# Supplementary material for: Plasma metabolomic profiling of hypertrophic cardiomyopathy patients before and after surgical myectomy suggests postoperative improvement in metabolic function
Source: BMC Cardiovasc Disord. 2021 Dec 28;21:617. doi: 10.1186/s12872-021-02437-0 (PMC8714427; doi:10.1186/s12872-021-02437-0)
Supplement: Supplementary file 2 — Additional file 2: Complete Metabolomic Profile of All Samples Tested. [file 12872_2021_2437_MOESM2_ESM.xlsx]

## Sheet: Sheet1
	Heat map of statistically significant biochemicals profiled in this study.
											Fold of Change		Statistical Values			Mean Values				% Filled Values
											Matched Pairs t-test		Matched Pairs t-test
											Post Pre		Avg ratio pre post			Pre	Post	Avg ratio pre post		Pre	Post		Super Pathway	Sub Pathway	Chemical ID	CAS	RI	Mass
	Pathway Sort Order	Super Pathway	Sub Pathway	Biochemical Name	Platform	Comp ID	KEGG	HMDB	PUBCHEM	X		X	p-value	q-value	X				X			X
	1	Amino Acid	Glycine, Serine and Threonine Metabolism	glycine	LC/MS pos early	58	C00037	HMDB0000123	750		1.01		0.8356	0.6635		1.0397	1.0342	1.0065		100	100		Amino Acid	Glycine, Serine and Threonine Metabolism	340	56-40-6	1375	76.0393
	2			N-acetylglycine	LC/MS pos early	27710		HMDB0000532	10972		0.92		0.0974	0.2777		1.3041	1.1124	0.925		100	100		Amino Acid	Glycine, Serine and Threonine Metabolism	100001006	543-24-8	826	118.05
	5			sarcosine	LC/MS pos early	1516	C00213	HMDB0000271	1088		1.36		0.2225	0.3921		1.0378	1.3547	1.3628		100	100		Amino Acid	Glycine, Serine and Threonine Metabolism	1023	107-97-1	1280	90.055
	6			dimethylglycine	LC/MS pos early	5086	C03626	HMDB0000092	673		1.04		0.6165	0.5952		0.9971	1.0224	1.0413		100	100		Amino Acid	Glycine, Serine and Threonine Metabolism	806	1118-68-9	1104	104.071
	7			betaine	LC/MS pos early	3141	C00719	HMDB0000043	247		1.06		0.2937	0.4438		0.9665	1.0206	1.0588		100	100		Amino Acid	Glycine, Serine and Threonine Metabolism	799	107-43-7	1064	118.086
	10			serine	LC/MS pos early	1648	C00065	HMDB0000187	5951		0.98		0.4778	0.5291		1.0577	1.031	0.9848		100	100		Amino Acid	Glycine, Serine and Threonine Metabolism	503	56-45-1	1239	106.05
	11			N-acetylserine	LC/MS polar	37076		HMDB0002931	65249		1		0.6556	0.6049		1.1029	1.0768	0.9956		100	100		Amino Acid	Glycine, Serine and Threonine Metabolism	100001851	97-14-3	2000	146.046
	17			threonine	LC/MS pos early	1284	C00188	HMDB0000167	6288		1		0.6688	0.6119		1.062	1.0484	1.0024		100	100		Amino Acid	Glycine, Serine and Threonine Metabolism	564	72-19-5	1514	120.066
	18			N-acetylthreonine	LC/MS polar	33939		HMDB0062557	152204		1.02		0.6118	0.5941		0.974	0.9792	1.0245		100	100		Amino Acid	Glycine, Serine and Threonine Metabolism	100001274	17093-74-2	1700	160.062
	19			allo-threonine	LC/MS polar	15142	C05519	HMDB0004041	99289		2.24		0.1355	0.3126		0.6081	0.8128	2.2377		67	78		Amino Acid	Glycine, Serine and Threonine Metabolism	100000272	28954-12-3	2511.1	118.051
	23			O-acetylhomoserine	LC/MS polar	31539	C01077	HMDB0029423	439389		1		0.3681	0.4787		2.5261	1.3588	0.9985		100	100		Amino Acid	Glycine, Serine and Threonine Metabolism	100001129	7540-67-2	1850	160.062
	29		Alanine and Aspartate Metabolism	alanine	LC/MS pos early	1126	C00041	HMDB0000161	5950		1.07		0.2139	0.3864		0.988	1.0402	1.068		100	100		Amino Acid	Alanine and Aspartate Metabolism	811	56-41-7	1700	90.055
	31			N-acetylalanine	LC/MS neg	1585	C02847	HMDB0000766	88064		0.99		0.6018	0.5876		0.9958	0.9858	0.9939		100	100		Amino Acid	Alanine and Aspartate Metabolism	1110	97-69-8	861	130.051
	33			N,N-dimethylalanine	LC/MS pos early	63151			5488191		1.19		0.9104	0.6851		1.0644	1.1995	1.1933		100	100		Amino Acid	Alanine and Aspartate Metabolism	100020371	2812-31-9	1370	118.086
	35			N-carbamoylalanine	LC/MS pos early	52340			426409		1.51		0.024	0.1753		0.8169	1.0799	1.5135		89	89		Amino Acid	Alanine and Aspartate Metabolism	100006369	77340-50-2	950	133.061
	36			aspartate	LC/MS pos early	443	C00049	HMDB0000191	5960		1.12		0.6105	0.5938		1.1337	1.1103	1.1232		100	100		Amino Acid	Alanine and Aspartate Metabolism	234	56-84-8	1165	134.045
	37			N-acetylaspartate (NAA)	LC/MS neg	22185	C01042	HMDB0000812	65065		1.04		0.8599	0.672		0.993	1.0079	1.0389		100	100		Amino Acid	Alanine and Aspartate Metabolism	100000787	997-55-7;997-55-7	620.5	174.041
	40			asparagine	LC/MS pos early	512	C00152	HMDB0000168	6267		0.98		0.4094	0.5027		1.0023	0.9673	0.9797		100	100		Amino Acid	Alanine and Aspartate Metabolism	917	70-47-3	1225	133.061
	42			N-acetylasparagine	LC/MS polar	33942		HMDB0006028	99715		1.19		0.1165	0.2976		1.0069	1.166	1.1936		100	100		Amino Acid	Alanine and Aspartate Metabolism	100001257	4033-40-3	2250	173.057
	43			hydroxyasparagine**	LC/MS pos early	62060	C20631	HMDB32332	15991574		1.02		0.5883	0.584		1.0393	1.0402	1.0215		100	100		Amino Acid	Alanine and Aspartate Metabolism	100020205		1149	149.056
	44		Glutamate Metabolism	glutamate	LC/MS pos early	57	C00025 C00217	HMDB0000148	33032		1		0.3897	0.4916		1.1596	1.0666	1.0006		100	100		Amino Acid	Glutamate Metabolism	561	56-86-0	1500	148.06
	45			glutamine	LC/MS pos early	53	C00064	HMDB0000641	5961		0.98		0.3619	0.4755		1.0304	1.0078	0.9817		100	100		Amino Acid	Glutamate Metabolism	563	56-85-9	1291	147.076
	46			alpha-ketoglutaramate*	LC/MS polar	62101	C00940	HMDB0001552	48		0.92		0.0158	0.1563		1.1555	1.0439	0.9166		100	100		Amino Acid	Glutamate Metabolism	100002397	18465-19-5	1916	144.03
	47			N-acetylglutamate	LC/MS polar	15720	C00624	HMDB0001138	70914		1.14		0.3301	0.4574		1.0022	1.1197	1.1373		100	100		Amino Acid	Glutamate Metabolism	100000282	5817-08-03	3106	188.056
	48			N-acetylglutamine	LC/MS polar	33943	C02716	HMDB0006029	182230		1.03		0.8583	0.6717		1.0499	1.076	1.0278		100	100		Amino Acid	Glutamate Metabolism	100001253	2490-97-3	2140	187.072
	51			4-hydroxyglutamate	LC/MS pos early	40499	C03079	HMDB0001344	439902		1.59		0.2064	0.3812		1.0382	1.2317	1.5949		89	94		Amino Acid	Glutamate Metabolism	100002544	2485-33-8	1141	164.055
	53			gamma-carboxyglutamate	LC/MS pos early	38754		HMDB0041900	40772		1.12		0.0292	0.1861		0.939	1.0202	1.1202		100	100		Amino Acid	Glutamate Metabolism	100002679	56271-99-9	903	192.05
	55			N-acetyl-aspartyl-glutamate (NAAG)	LC/MS pos early	35665	C12270	HMDB0001067	188803		0.87		0.0171	0.1647		1.1112	0.9582	0.8741		83	78		Amino Acid	Glutamate Metabolism	100001612	3106-85-2	1035	305.098
	56			beta-citrylglutamate	LC/MS neg	54923	C20775		189741		1.16		0.4469	0.5189		0.9562	1.1174	1.1602		100	100		Amino Acid	Glutamate Metabolism	100003271	73590-26-8	530	320.062
	58			carboxyethyl-GABA	LC/MS pos early	40007		HMDB0002201	2572		1.23		0.2475	0.4134		0.9355	1.0483	1.2316		94	100		Amino Acid	Glutamate Metabolism	100003260	4386-03-02	2085	176.092
	62			S-1-pyrroline-5-carboxylate	LC/MS pos early	42370	C04322	HMDB0001301	11966181		0.95		0.2154	0.3874		1.098	0.9797	0.9545		100	100		Amino Acid	Glutamate Metabolism	35	2906-39-0	1528	114.055
	70		Histidine Metabolism	histidine	LC/MS pos early	59	C00135	HMDB0000177	6274		1		0.8259	0.6604		0.9969	0.9929	1.0031		100	100		Amino Acid	Histidine Metabolism	355	5934-29-2	2707	156.077
	71			1-methylhistidine	LC/MS pos early	30460	C01152	HMDB0000001	92105		1		0.399	0.4959		1.1858	1.0594	1.0016		100	100		Amino Acid	Histidine Metabolism	100001051	332-80-9	2755	170.092
	72			3-methylhistidine	LC/MS neg	15677	C01152	HMDB0000479	64969		1.64		0.9181	0.6851		1.286	1.3097	1.6418		100	100		Amino Acid	Histidine Metabolism	100000042	368-16-1	906.3	168.078
	73			N-acetylhistidine	LC/MS polar	33946	C02997	HMDB0032055	75619		1.02		0.788	0.6468		0.9792	0.9967	1.0188		100	100		Amino Acid	Histidine Metabolism	100001293	39145-52-3	2088	196.073
	75			N-acetyl-3-methylhistidine*	LC/MS neg	43256			193270		1.25		0.6853	0.6184		1.042	1.1183	1.2537		94	100		Amino Acid	Histidine Metabolism	100002204	37841-04-6	1360	210.088
	76			N-acetyl-1-methylhistidine*	LC/MS pos early	43255			53859791		1.19		0.3208	0.4574		1.435	1.4318	1.1921		94	100		Amino Acid	Histidine Metabolism	100004299		2100	212.103
	77			hydantoin-5-propionate	LC/MS polar	40473	C05565	HMDB0001212	782		1.51		0.7549	0.6427		1.1826	1.5377	1.5131		100	100		Amino Acid	Histidine Metabolism	100002514	5624-26-0	2080	171.041
	78			trans-urocanate	LC/MS polar	607	C00785	HMDB0000301	736715		1.46		0.1361	0.3133		0.9886	1.1768	1.4645		100	100		Amino Acid	Histidine Metabolism	537	104-98-3	1882.5	137.036
	79			cis-urocanate	LC/MS polar	40410		HMDB0034174	1549103		1.39		0.4187	0.5075		1.0032	1.2289	1.3891		100	100		Amino Acid	Histidine Metabolism	100003425	7699-35-6	1195	137.036
	80			imidazole propionate	LC/MS pos early	40730		HMDB0002271	70630		1.18		0.717	0.6307		1.6897	1.5924	1.181		100	100		Amino Acid	Histidine Metabolism	100003434	1074-59-5	2263	141.066
	81			formiminoglutamate	LC/MS pos early	43493	C00439	HMDB0000854	439233		1.21		0.9184	0.6851		1.0923	1.1241	1.2111		100	100		Amino Acid	Histidine Metabolism	100002500	816-90-0	1880	175.071
	83			imidazole lactate	LC/MS pos early	15716	C05568	HMDB0002320	793		1.02		0.9151	0.6851		1.0817	1.0834	1.0175		100	100		Amino Acid	Histidine Metabolism	100000263	14403-45-3	2040	157.061
	86			N-acetylcarnosine	LC/MS neg	43488		HMDB0012881	9903482		1.03		0.4869	0.5339		1.2287	1.18	1.0294		100	100		Amino Acid	Histidine Metabolism	100004046	56353-15-2	1235	267.11
	87			anserine	LC/MS neg	15747	C01262	HMDB0000194	112072		1.63		0.3313	0.4574		0.1507	0.2451	1.626		6	6		Amino Acid	Histidine Metabolism	100000044	10030-52-1	1124.8	239.115
	91			1-methyl-4-imidazoleacetate	LC/MS pos early	32350	C05828	HMDB0002820	75810		1.07		0.7923	0.6468		1.1357	1.1533	1.0726		100	100		Amino Acid	Histidine Metabolism	100001208	2625-49-2	2064	141.066
	92			1-methyl-5-imidazoleacetate	LC/MS pos early	62946		HMDB04988	6451814		1.08		0.41	0.5027		1.0712	0.9648	1.0834		100	100		Amino Acid	Histidine Metabolism	100002910	4200-48-0	1989	141.066
	93			1-methyl-5-imidazolelactate	LC/MS neg	64596					1.18		0.9201	0.6851		1.0046	1.0825	1.1827		100	100		Amino Acid	Histidine Metabolism	100021478	2022510-60-5	1011	169.062
	96			1-ribosyl-imidazoleacetate*	LC/MS pos early	61868	C05131	HMDB0002331	440569		1.03		0.7957	0.6473		1.015	1.0274	1.0313		100	100		Amino Acid	Histidine Metabolism	100001668	29605-99-0	2006	259.092
	97			4-imidazoleacetate	LC/MS polar	32349	C02835	HMDB0002024	96215		1.08		0.2827	0.4352		1.032	1.1239	1.0808		100	100		Amino Acid	Histidine Metabolism	100001207	645-65-8	2236	125.036
	105		Lysine Metabolism	lysine	LC/MS pos early	1301	C00047 C00739	HMDB0003405	5962		0.92		0.012	0.1439		1.0232	0.9416	0.9219		100	100		Amino Acid	Lysine Metabolism	407	56-87-1	2850	147.113
	106			N2-acetyllysine	LC/MS polar	36751	C12989	HMDB0000446	92907		0.88		0.0408	0.2055		0.9163	0.7638	0.8783		89	61		Amino Acid	Lysine Metabolism	100001721	1946-82-3	3372.6	187.109
	107			N6-acetyllysine	LC/MS neg	36752	C02727	HMDB0000206	92832		1.02		0.9196	0.6851		1.0528	1.0696	1.0175		100	100		Amino Acid	Lysine Metabolism	100001734	692-04-6	1059	187.109
	109			N2-acetyl,N6-methyllysine	LC/MS pos early	62954					1.03		0.9692	0.6967		1.5677	1.4408	1.029		94	100		Amino Acid	Lysine Metabolism	100020546		2168	203.139
	110			N2-acetyl,N6,N6-dimethyllysine	LC/MS pos early	63254					1.09		0.3875	0.4906		1.3507	1.4211	1.087		94	94		Amino Acid	Lysine Metabolism	100020545		2172	217.155
	114			N6-methyllysine	LC/MS pos early	62860	C02728	HMDB0002038	164795		1.02		0.9755	0.6971		1.6731	1.5942	1.0197		100	100		Amino Acid	Lysine Metabolism	100003415	1188-07-4	2831	161.128
	115			N6,N6-dimethyllysine	LC/MS pos early	62862	C05545	HMDB0013287	193344		1.07		0.2895	0.4403		1.312	1.3879	1.0699		100	100		Amino Acid	Lysine Metabolism	100020417	2259-86-1	2831	175.144
	116			N6,N6,N6-trimethyllysine	LC/MS pos early	1498	C03793	HMDB0001325	440120		1.07		0.5221	0.5525		1.0725	1.1401	1.0738		100	100		Amino Acid	Lysine Metabolism	189	23284-33-5	2825	189.16
	117			hydroxy-N6,N6,N6-trimethyllysine*	LC/MS pos early	62959					1.03		0.8541	0.6703		0.9998	0.9934	1.0261		100	100		Amino Acid	Lysine Metabolism	100021123		2759	205.155
	119			5-hydroxylysine	LC/MS pos early	15685	C16741	HMDB0000450	3032849		1.73		0.3459	0.4693		1.059	1.4815	1.7327		100	100		Amino Acid	Lysine Metabolism	100000054	13204-98-3	2790	163.108
	120			5-(galactosylhydroxy)-L-lysine	LC/MS pos early	43582			66995551		1.24		0.0337	0.1948		0.91	1.0465	1.2417		94	100		Amino Acid	Lysine Metabolism	100002462	32448-36-5	2755	325.161
	121			fructosyllysine	LC/MS pos early	46227		HMDB0034879	9839580		0.92		0.1047	0.283		1.1019	0.9772	0.9189		100	100		Amino Acid	Lysine Metabolism	100005373	21291-40-7	2784	309.166
	123			2-aminoadipate	LC/MS polar	6146	C00956	HMDB0000510	92136		1.06		0.7284	0.6336		1.0397	0.9642	1.0623		100	100		Amino Acid	Lysine Metabolism	381	542-32-5;1118-90-7	3500	160.062
	127			glutarylcarnitine (C5-DC)	LC/MS pos early	44664		HMDB0013130	71317118		0.89		0.0267	0.1816		1.1603	0.985	0.8911		100	100		Amino Acid	Lysine Metabolism	100001593	102636-82-8	2393	276.144
	131			pipecolate	LC/MS pos early	1444	C00408	HMDB0000070	849		1.2		0.9716	0.6967		1.2017	1.1401	1.1973		100	100		Amino Acid	Lysine Metabolism	1025	4043-87-2	2200	130.086
	133			6-oxopiperidine-2-carboxylate	LC/MS neg	43231		HMDB0061705	3014237		1.11		0.9727	0.6967		1.0356	1.0232	1.1138		100	100		Amino Acid	Lysine Metabolism	100004499	34622-39-4	965	142.051
	138			N,N,N-trimethyl-5-aminovalerate	LC/MS pos early	57687			14274897		1.03		0.8925	0.6831		1.0502	1.0599	1.0286		100	100		Amino Acid	Lysine Metabolism	100015962		2186	160.133
	139			N-acetyl-2-aminoadipate	LC/MS polar	63920	C12986		443992		0.92		0.0277	0.1831		1.1014	1.0018	0.923		100	100		Amino Acid	Lysine Metabolism	100021760		2869	202.072
	140		Phenylalanine Metabolism	phenylalanine	LC/MS pos early	64	C00079	HMDB0000159	6140		1.02		0.9053	0.6851		0.9993	1.0125	1.0235		100	100		Amino Acid	Phenylalanine Metabolism	460	63-91-2	2878	166.086
	141			N-acetylphenylalanine	LC/MS neg	33950	C03519	HMDB0000512	74839		1.3		0.0015	0.0811		0.9144	1.1554	1.3027		100	100		Amino Acid	Phenylalanine Metabolism	100001256	2018-61-3	2597	206.082
	146			1-carboxyethylphenylalanine	LC/MS neg	62566			59100900		1.63		0.0177	0.1648		0.9277	1.2822	1.6296		100	100		Amino Acid	Phenylalanine Metabolism	100020419		2844	236.093
	150			phenylpyruvate	LC/MS neg	566	C00166	HMDB0000205	997		1.4		0.0039	0.1067		0.864	1.12	1.4019		100	100		Amino Acid	Phenylalanine Metabolism	241	156-06-9	2515	163.04
	151			phenyllactate (PLA)	LC/MS neg	22130	C05607	HMDB0000779 HMDB0000563	3848		1.15		0.9865	0.6994		1.2782	1.2665	1.1486		100	100		Amino Acid	Phenylalanine Metabolism	100000774	828-01-3	2208	165.056
	155			phenylacetate	LC/MS neg	57745	C07086	HMDB0000209	999		0.87		0.0491	0.2158		1.3595	1.0985	0.8742		94	94		Amino Acid	Phenylalanine Metabolism	100000011	103-82-2	2150	91.0554
	156			2-hydroxyphenylacetate	LC/MS polar	1432	C05852	HMDB0000669	11970		1.2		0.2367	0.4049		1.042	1.1676	1.203		100	100		Amino Acid	Phenylalanine Metabolism	235	614-75-5	858.6	151.04
	159			4-hydroxyphenylacetate	LC/MS neg	541	C00642	HMDB0000020	127		1.11		0.9027	0.6851		1.5793	1.746	1.1132		100	100		Amino Acid	Phenylalanine Metabolism	144	156-38-7	1361	151.04
	162		Tyrosine Metabolism	tyrosine	LC/MS pos early	1299	C00082	HMDB0000158	6057		1.07		0.4598	0.524		0.9971	1.0331	1.0674		100	100		Amino Acid	Tyrosine Metabolism	815	60-18-4	2430	182.081
	163			N-acetyltyrosine	LC/MS neg	32390		HMDB0000866	68310		1.17		0.0281	0.1831		0.928	1.0568	1.1746		100	100		Amino Acid	Tyrosine Metabolism	100001104	537-55-3	1680	222.077
	164			1-carboxyethyltyrosine	LC/MS neg	62564					1.6		0.0205	0.1659		0.9399	1.2635	1.6018		100	100		Amino Acid	Tyrosine Metabolism	100020421		1846	252.088
	171			m-tyramine sulfate	LC/MS neg	48417					1.84		0.9561	0.6947		1.1793	1.9523	1.8434		100	89		Amino Acid	Tyrosine Metabolism	100006104	175727-14-7	1723	216.034
	175			4-hydroxyphenylpyruvate	LC/MS neg	1669	C01179	HMDB0000707	979		1.35		0.0373	0.2012		0.9499	1.1731	1.3543		100	100		Amino Acid	Tyrosine Metabolism	1141	156-39-8	1690	179.035
	180			4-hydroxyphenylacetoylcarnitine	LC/MS pos early	52932					1.31		0.3544	0.4719		1.7992	2.054	1.3089		100	94		Amino Acid	Tyrosine Metabolism	100006619		2730	296.149
	181			3-(4-hydroxyphenyl)lactate	LC/MS neg	32197	C03672	HMDB0000755	9378		1.1		0.2047	0.3812		1.0186	1.1113	1.1023		100	100		Amino Acid	Tyrosine Metabolism	240	6482-98-0	1379	181.051
	190			phenol sulfate	LC/MS neg	32553	C02180	HMDB0060015	74426		1.13		0.6301	0.5994		1.4055	1.1215	1.1256		100	100		Amino Acid	Tyrosine Metabolism	100001510	937-34-8	2156	172.991
	191			phenol glucuronide	LC/MS neg	52747		HMDB0060014	87235		1.18		0.9032	0.6851		1.351	1.2279	1.1779		67	50		Amino Acid	Tyrosine Metabolism	100006679	17685-05-1	1800	269.067
	193			4-methoxyphenol sulfate	LC/MS neg	48457					1.7		0.0602	0.2321		1.0376	1.4471	1.7002		100	100		Amino Acid	Tyrosine Metabolism	100006262	3233-60-1	2412	203.002
	201			vanillactate	LC/MS neg	54910		HMDB0000913	160637		1.2		0.7561	0.6429		1.4203	1.2502	1.2006		100	100		Amino Acid	Tyrosine Metabolism	100006129	2475-56-1	1625	211.061
	202			vanillylmandelate (VMA)	LC/MS neg	1567	C05584	HMDB0000291	1245		1.21		0.0252	0.1792		1.0526	1.2903	1.2118		100	94		Amino Acid	Tyrosine Metabolism	1111	55-10-7	941	197.046
	204			3-methoxytyrosine	LC/MS pos early	12017		HMDB0001434	9307		1.09		0.1976	0.3754		0.9755	1.0501	1.0887		100	100		Amino Acid	Tyrosine Metabolism	1342	300-48-1	2555	212.092
	206			3-methoxytyramine sulfate	LC/MS neg	44618			54133459		0.97		0.2217	0.3916		1.1784	0.9864	0.9675		100	100		Amino Acid	Tyrosine Metabolism	100004634		1722	246.044
	219			gentisate	LC/MS polar	18280	C00628	HMDB0000152	3469		2.58		0.0157	0.1563		1.0073	2.1116	2.5818		100	100		Amino Acid	Tyrosine Metabolism	100000447	490-79-9	905	153.019
	223			dopamine 4-sulfate	LC/MS neg	48406	C13691	HMDB0004148	68517194		1.3		0.941	0.6911		1.2386	1.2561	1.2986		100	100		Amino Acid	Tyrosine Metabolism	100006360		1511	232.028
	224			dopamine 3-O-sulfate	LC/MS neg	48407	C13690	HMDB0006275	122136		1.24		0.575	0.5801		1.4554	1.3448	1.2443		100	100		Amino Acid	Tyrosine Metabolism	100006361		1556.2	232.028
	225			p-cresol glucuronide*	LC/MS neg	48841		HMDB0011686	154035		0.88		0.046	0.2118		2.9147	3.6961	0.8843		100	100		Amino Acid	Tyrosine Metabolism	100006191	17680-99-8	2420	283.082
	226			tyramine O-sulfate	LC/MS neg	48408		HMDB0006409	153005		1.72		0.1956	0.374		3.3905	2.8247	1.7157		94	100		Amino Acid	Tyrosine Metabolism	100006092	30223-92-8	1565	216.034
	227			N-formylphenylalanine	LC/MS neg	48433		HMDB0240317	7064571;759256		1.19		0.0722	0.2476		0.9261	1.0827	1.1919		100	100		Amino Acid	Tyrosine Metabolism	100006056	13200-85-6	2360	192.067
	228			vanillic alcohol sulfate	LC/MS neg	48733		HMDB0041788			12.26		0.2384	0.4061		2.7867	4.6443	12.2594		78	89		Amino Acid	Tyrosine Metabolism	100006125	754920-02-0	1808	233.013
	237			catechol glucuronide	LC/MS neg	53243			75124209		7.31		0.0463	0.2118		0.8273	1.7352	7.3093		72	89		Amino Acid	Tyrosine Metabolism	100009326		1742	285.062
	245			thyroxine	LC/MS neg	2761	C01829	HMDB0000248	5819		1.07		0.601	0.5876		0.9329	0.9743	1.0657		100	100		Amino Acid	Tyrosine Metabolism	1094	51-48-9	4808	775.679
	254		Tryptophan Metabolism	tryptophan	LC/MS pos early	54	C00078	HMDB0000929	6305		1.08		0.1284	0.3065		0.9738	1.0283	1.0822		100	100		Amino Acid	Tryptophan Metabolism	565	73-22-3	2986	205.097
	255			N-acetyltryptophan	LC/MS neg	33959	C03137	HMDB0013713	439917;700653		1.35		0.0012	0.0767		0.8615	1.1024	1.3522		100	100		Amino Acid	Tryptophan Metabolism	100001254	1218-34-4	2630	245.093
	261			C-glycosyltryptophan	LC/MS neg	48782		HMDB0240296	10981970		0.99		0.5977	0.5865		1.1194	1.104	0.9915		100	100		Amino Acid	Tryptophan Metabolism	100006379	180509-18-6	1777	365.135
	263			oxindolylalanine	LC/MS pos early	64568			20977764		1.25		0.0348	0.1957		0.9161	1.0813	1.2513		100	100		Amino Acid	Tryptophan Metabolism	100022120		2756	221.092
	264			tryptophan betaine	LC/MS pos early	37097	C09213	HMDB0061115	442106		1.42		0.1663	0.3491		1.6853	1.6575	1.4209		100	100		Amino Acid	Tryptophan Metabolism	100001743	20671-76-5	2673	247.144
	267			kynurenine	LC/MS pos early	15140	C00328	HMDB0000684	161166		1.22		0.004	0.1067		0.9319	1.0931	1.2154		100	100		Amino Acid	Tryptophan Metabolism	100000265	2922-83-0	2739	209.092
	270			N-acetylkynurenine (2)	LC/MS neg	48757			73817779		1.48		0.0677	0.2418		0.9392	1.1662	1.4843		100	100		Amino Acid	Tryptophan Metabolism	100006378		2378	249.088
	272			kynurenate	LC/MS neg	1417	C01717	HMDB0000715	3845		1.07		0.9468	0.6926		1.0974	1.112	1.0745		100	100		Amino Acid	Tryptophan Metabolism	98	492-27-3	2224	188.035
	274			N-formylanthranilic acid	LC/MS polar	43549	C05653	HMDB0004089	101399		1.19		0.0781	0.2527		1.0055	1.169	1.1931		100	100		Amino Acid	Tryptophan Metabolism	100004561	3342-77-6	900	164.035
	278			xanthurenate	LC/MS neg	15679	C02470	HMDB0000881	5699		1.49		0.3078	0.4535		1.0553	1.2789	1.4944		100	100		Amino Acid	Tryptophan Metabolism	100000015	59-007	1476	204.03
	279			8-methoxykynurenate	LC/MS neg	62955	C05830	HMDB0060426	76230		1.05		0.6191	0.5963		1.1497	1.1114	1.0491		94	94		Amino Acid	Tryptophan Metabolism	100020360	2929-14-8	2863	218.046
	282			picolinate	LC/MS pos early	1512	C10164	HMDB0002243	1018		1.7		0.0775	0.2527		0.8879	1.1319	1.7011		61	89		Amino Acid	Tryptophan Metabolism	1022	98-98-6	910	124.039
	287			serotonin	LC/MS pos early	2342	C00780	HMDB0000259	5202		13.09		0.3876	0.4906		1.421	1.8585	13.0853		72	83		Amino Acid	Tryptophan Metabolism	504	153-98-0	2550	177.102
	298			indolelactate	LC/MS neg	18349	C02043	HMDB0000671	92904		1.13		0.0931	0.2728		1.0124	1.138	1.1336		100	100		Amino Acid	Tryptophan Metabolism	100000463	832-97-3	2286	204.067
	299			indoleacetate	LC/MS neg	27513	C00954	HMDB0000197	802		1.29		0.8676	0.674		1.2162	1.2941	1.2943		100	100		Amino Acid	Tryptophan Metabolism	100001034	6505-45-9	2200	174.056
	305			indolepropionate	LC/MS neg	32405		HMDB0002302	3744		2.69		0.5404	0.5629		1.313	1.4116	2.6895		94	100		Amino Acid	Tryptophan Metabolism	100001083	830-96-6	2795	188.072
	307			indoleacetylglutamine	LC/MS neg	42087		HMDB0013240	25200879		1.33		0.655	0.6049		1.1679	1.1953	1.3304		94	94		Amino Acid	Tryptophan Metabolism	100001731		2535	302.115
	316			indole-3-carboxylate	LC/MS neg	38116	C19837	HMDB0003320	69867		1.38		0.4505	0.5208		0.8943	0.9058	1.3844		72	78		Amino Acid	Tryptophan Metabolism	100002185	771-50-6	1710	160.04
	319			indoleacetoylcarnitine*	LC/MS pos early	62279					1.12		0.1066	0.2856		1.9249	1.3538	1.117		100	100		Amino Acid	Tryptophan Metabolism	100020479		3114	319.165
	320			5-hydroxyindole sulfate	LC/MS neg	52914					1.04		0.312	0.4545		0.9014	0.814	1.0395		89	78		Amino Acid	Tryptophan Metabolism	100009042		1928	212.002
	321			7-hydroxyindole sulfate	LC/MS neg	52915					0.76		0.0057	0.1135		1.1973	0.7435	0.7619		83	50		Amino Acid	Tryptophan Metabolism	100009043		1765	212.002
	322			3-indoxyl sulfate	LC/MS neg	27672		HMDB0000682	10258		1.06		0.6293	0.5994		1.1963	1.1722	1.0602		100	100		Amino Acid	Tryptophan Metabolism	100000467	2642-37-7	2222.2	212.002
	327			6-bromotryptophan	LC/MS neg	62503			9856996		1.13		0.0419	0.2077		0.9733	1.0682	1.1348		100	100		Amino Acid	Tryptophan Metabolism	100020414		3565	280.993
	332		Leucine, Isoleucine and Valine Metabolism	leucine	LC/MS pos early	60	C00123	HMDB0000687	6106		1		0.5712	0.5787		0.9687	0.9412	0.998		100	100		Amino Acid	Leucine, Isoleucine and Valine Metabolism	397	61-90-5	2864	132.102
	336			N-acetylleucine	LC/MS neg	1587	C02710	HMDB0011756	70912		1.32		0.0108	0.1439		0.8923	1.1444	1.3171		100	100		Amino Acid	Leucine, Isoleucine and Valine Metabolism	1082	1188-21-2	2400	172.098
	340			1-carboxyethylleucine	LC/MS neg	62559					1.41		0.1185	0.2985		0.9395	1.0947	1.4121		100	100		Amino Acid	Leucine, Isoleucine and Valine Metabolism	100020425		2663	202.108
	343			4-methyl-2-oxopentanoate	LC/MS neg	22116	C00233	HMDB0000695	70		1.02		0.6442	0.6031		1.0244	0.9958	1.0159		100	100		Amino Acid	Leucine, Isoleucine and Valine Metabolism	100000551	816-66-0	2170	129.056
	347			alpha-hydroxyisocaproate	LC/MS neg	22132	C03264	HMDB0000665 HMDB0000624 HMDB00746	92779;83697;439960		1.03		0.6932	0.6208		1.0206	0.9691	1.0348		100	100		Amino Acid	Leucine, Isoleucine and Valine Metabolism	100000706	10303-64-7	1840	131.071
	348			2-ketocaprylate	LC/MS neg	63120		HMDB13211	67600		1.35		0.1006	0.2821		0.8884	1.0275	1.3469		100	100		Amino Acid	Leucine, Isoleucine and Valine Metabolism	100020833	328-51-8	3951	157.087
	351			isovalerate (i5:0)	LC/MS neg	44656	C08262	HMDB0000718	10430		1.39		0.2553	0.42		1.0212	1.1466	1.3913		100	100		Amino Acid	Leucine, Isoleucine and Valine Metabolism	100000708	503-74-2	1564	101.061
	353			isovalerylglycine	LC/MS neg	35107		HMDB00678	546304		1.29		0.1176	0.2976		1.0655	1.2627	1.2948		100	100		Amino Acid	Leucine, Isoleucine and Valine Metabolism	100001452	16284-60-9	1950	158.082
	354			isovalerylcarnitine (C5)	LC/MS pos early	34407	C20826	HMDB0000688	169235		1.24		0.379	0.4854		1.0647	1.0921	1.2414		100	100		Amino Acid	Leucine, Isoleucine and Valine Metabolism	100001393	31023-24-2	3085	246.17
	363			beta-hydroxyisovalerate	LC/MS neg	12129		HMDB0000754	69362		1.07		0.767	0.6451		0.9924	0.9831	1.066		100	100		Amino Acid	Leucine, Isoleucine and Valine Metabolism	1442	625-08-1	1027	117.056
	364			beta-hydroxyisovaleroylcarnitine	LC/MS pos early	35433					0.99		0.3539	0.4719		1.1091	1.0137	0.9867		100	100		Amino Acid	Leucine, Isoleucine and Valine Metabolism	100001594	99159-87-2	2584	262.165
	367			3-methylglutaconate	LC/MS polar	57747		HMDB0000522	1551553		0.99		0.5854	0.5831		1.125	1.1027	0.9913		100	100		Amino Acid	Leucine, Isoleucine and Valine Metabolism	100002458	5746-90-7	2700	99.0452
	375			3-methylglutarylcarnitine (2)	LC/MS pos early	46548		HMDB0000552	128145		1.01		0.5954	0.5859		1.0812	1.0643	1.0138		100	100		Amino Acid	Leucine, Isoleucine and Valine Metabolism	100005850		2687	290.16
	385			isoleucine	LC/MS pos early	1125	C16424 C00407 C06418	HMDB0000172	6306		1.04		0.9594	0.6948		0.9865	0.991	1.0443		100	100		Amino Acid	Leucine, Isoleucine and Valine Metabolism	376	73-32-5	2800	132.102
	387			N-acetylisoleucine	LC/MS neg	33967		HMDB0061684	306109		1.29		0.0331	0.1948		0.904	1.1206	1.2905		100	100		Amino Acid	Leucine, Isoleucine and Valine Metabolism	100001276	3077-46-1	2325	172.098
	391			1-carboxyethylisoleucine	LC/MS neg	62558					1.61		0.0156	0.1563		0.9507	1.2548	1.6148		100	100		Amino Acid	Leucine, Isoleucine and Valine Metabolism	100020427		2628	202.108
	394			3-methyl-2-oxovalerate	LC/MS neg	15676	C00671 C06008 C03465	HMDB0000491	440877;439286		1.05		0.9784	0.6983		1.0541	1.0553	1.0496		100	100		Amino Acid	Leucine, Isoleucine and Valine Metabolism	100000036	1460-34-0;51829-07-3	2064.2	129.056
	395			2-hydroxy-3-methylvalerate	LC/MS neg	36746		HMDB0000317	164623		1.23		0.5436	0.5657		1.0029	1.0827	1.2294		100	100		Amino Acid	Leucine, Isoleucine and Valine Metabolism	100001541	488-15-3	1800	131.071
	397			2-methylbutyrylcarnitine (C5)	LC/MS pos early	45095		HMDB0000378	6426901		1.06		0.6727	0.6143		1.0005	1.0384	1.0617		100	100		Amino Acid	Leucine, Isoleucine and Valine Metabolism	100001509	31023-25-3	3050	246.17
	400			tiglylcarnitine (C5:1-DC)	LC/MS pos early	35428		HMDB0002366	22833596		1.03		0.5331	0.5597		1.1851	1.0715	1.0253		100	100		Amino Acid	Leucine, Isoleucine and Valine Metabolism	100001597	64191-86-2	2962	244.154
	405			3-hydroxy-2-ethylpropionate	LC/MS polar	32397		HMDB0000396	188979		0.94		0.1402	0.318		1.035	0.9211	0.9368		100	100		Amino Acid	Leucine, Isoleucine and Valine Metabolism	100001170	4374-62-3	1443.3	117.056
	407			ethylmalonate	LC/MS polar	15765		HMDB0000622	11756		0.91		0.0608	0.2321		1.2458	1.0519	0.9144		100	100		Amino Acid	Leucine, Isoleucine and Valine Metabolism	2054	601-75-2	2785	131.035
	410			methylsuccinate	LC/MS polar	15745		HMDB0001844	10349		1.22		0.1373	0.3136		0.9049	1.0293	1.2202		100	100		Amino Acid	Leucine, Isoleucine and Valine Metabolism	2051	498-21-5	2800	131.035
	416			valine	LC/MS neg	1649	C00183	HMDB0000883	6287		1.04		0.9116	0.6851		0.9972	1.0051	1.0436		100	100		Amino Acid	Leucine, Isoleucine and Valine Metabolism	566	72-18-4	909.4	116.072
	417			N-acetylvaline	LC/MS neg	1591		HMDB0011757	66789		1.07		0.0339	0.1948		0.9635	1.0303	1.0738		100	100		Amino Acid	Leucine, Isoleucine and Valine Metabolism	1084	96-81-1	1704	158.082
	420			1-carboxyethylvaline	LC/MS neg	62562					1.36		0.0465	0.2118		0.9152	1.125	1.3557		100	100		Amino Acid	Leucine, Isoleucine and Valine Metabolism	100020423		2008	188.093
	423			3-methyl-2-oxobutyrate	LC/MS polar	44526	C00141	HMDB0000019	49		1.02		0.7873	0.6468		1.0538	1.0644	1.0245		100	100		Amino Acid	Leucine, Isoleucine and Valine Metabolism	100000936	3715-29-5	911	115.04
	424			alpha-hydroxyisovalerate	LC/MS polar	46537		HMDB0000407	99823		1.11		0.1522	0.33		1.0998	1.2335	1.1138		100	100		Amino Acid	Leucine, Isoleucine and Valine Metabolism	100001300	600-37-3	1052	117.056
	426			isobutyrylcarnitine (C4)	LC/MS pos early	33441		HMDB0000736	168379		1.29		0.4451	0.5189		1.2607	1.3921	1.2927		100	100		Amino Acid	Leucine, Isoleucine and Valine Metabolism	100001055	25518-49-4	2810	232.154
	427			isobutyrylglycine	LC/MS neg	35437		HMDB0000730	10855600		1.24		0.0345	0.1948		0.9463	1.0853	1.2406		100	100		Amino Acid	Leucine, Isoleucine and Valine Metabolism	100001590	15926-18-8	1420	144.067
	428			3-hydroxyisobutyrate	LC/MS polar	1549	C01188 C06001	HMDB0000023 HMDB0000336	11966314		1.06		0.4657	0.5269		1.0514	0.9669	1.0573		100	100		Amino Acid	Leucine, Isoleucine and Valine Metabolism	111	2068-83-9	1619	103.04
	429			2,3-dihydroxy-2-methylbutyrate	LC/MS neg	57547		HMDB0029576	301941		1.35		0.0079	0.133		0.9048	1.1064	1.3468		100	100		Amino Acid	Leucine, Isoleucine and Valine Metabolism	100010869	14868-24-7	787	133.051
	434		Methionine, Cysteine, SAM and Taurine Metabolism	methionine	LC/MS pos early	1302	C00073	HMDB0000696	6137		0.96		0.2838	0.4352		1.0431	0.9758	0.9648		100	100		Amino Acid	Methionine, Cysteine, SAM and Taurine Metabolism	415	63-68-3	2526	150.058
	435			N-acetylmethionine	LC/MS neg	1589	C02712	HMDB0011745	448580		1.07		0.7674	0.6451		0.914	0.9624	1.0694		100	100		Amino Acid	Methionine, Cysteine, SAM and Taurine Metabolism	1083	65-82-7	1787	190.054
	437			N-formylmethionine	LC/MS neg	2829	C03145	HMDB0001015	439750		1.07		0.1369	0.3135		0.953	1.016	1.0707		100	100		Amino Acid	Methionine, Cysteine, SAM and Taurine Metabolism	194	4289-98-9	1543.8	176.039
	438			S-methylmethionine	LC/MS pos early	38127	C05319	HMDB0038670	458		7.94		0.4959	0.537		1.0269	0.9987	7.9362		50	78		Amino Acid	Methionine, Cysteine, SAM and Taurine Metabolism	100002183	3493-12-07	2555	164.074
	439			methionine sulfone	LC/MS pos early	44878		HMDB0062174	69961		1.18		0.2664	0.4238		1.0747	1.1885	1.1816		100	100		Amino Acid	Methionine, Cysteine, SAM and Taurine Metabolism	100004635	820-10-0	1250	182.048
	440			methionine sulfoxide	LC/MS pos early	18374	C02989	HMDB0002005	158980		1.09		0.7931	0.6468		1.0465	1.0672	1.0926		100	100		Amino Acid	Methionine, Cysteine, SAM and Taurine Metabolism	100000039	3226-65-1	1272	166.053
	446			S-adenosylhomocysteine (SAH)	LC/MS neg	42382	C00021	HMDB00939	439155		1.12		0.436	0.5152		1.0184	1.0989	1.116		94	100		Amino Acid	Methionine, Cysteine, SAM and Taurine Metabolism	197	979-92-0	1832.4	383.114
	448			2,3-dihydroxy-5-methylthio-4-pentenoate (DMTPA)*	LC/MS neg	62805		HMDB0240388			1.03		0.4824	0.5322		1.0734	1.0943	1.0319		100	100		Amino Acid	Methionine, Cysteine, SAM and Taurine Metabolism	100020893		1156	177.023
	449			2-hydroxy-4-(methylthio)butanoic acid	LC/MS polar	63739		HMDB0037115	11427		1.25		0.2587	0.4221		1.0892	1.2256	1.2463		100	100		Amino Acid	Methionine, Cysteine, SAM and Taurine Metabolism	100021372	583-91-5	1065	149.028
	453			cystathionine	LC/MS pos early	15705	C02291	HMDB0000099	439258		1.27		0.82	0.6594		1.1733	1.279	1.2679		100	100		Amino Acid	Methionine, Cysteine, SAM and Taurine Metabolism	310	535-34-2	2270	223.075
	454			alpha-ketobutyrate	LC/MS polar	4968	C00109	HMDB0000005	58		0.97		0.1946	0.3733		1.2223	1.0086	0.9673		100	100		Amino Acid	Methionine, Cysteine, SAM and Taurine Metabolism	796	600-18-0	940	101.024
	455			cysteine	LC/MS pos early	1868	C00097	HMDB0000574	5862		1		0.6767	0.6155		1.0418	1.0261	0.9955		100	100		Amino Acid	Methionine, Cysteine, SAM and Taurine Metabolism	800	52-90-4;56-89-3	1475	122.027
	457			S-methylcysteine	LC/MS neg	39592		HMDB0002108	88180;7058174;24417		1.05		0.7721	0.6456		1.0508	1.1034	1.0461		100	100		Amino Acid	Methionine, Cysteine, SAM and Taurine Metabolism	100002749	1187-84-4	880	134.028
	458			S-methylcysteine sulfoxide	LC/MS pos early	43378		HMDB0029432	82142		1.26		0.1787	0.3629		1.0326	1.1804	1.2563		100	100		Amino Acid	Methionine, Cysteine, SAM and Taurine Metabolism	100002927	6853-87-8	900	152.038
	460			S-carboxyethylcysteine	LC/MS pos early	64177					1.46		0.7583	0.6432		1.7304	1.2145	1.4571		100	100		Amino Acid	Methionine, Cysteine, SAM and Taurine Metabolism	100021530	4033-46-9	1785	194.048
	461			cysteine s-sulfate	LC/MS polar	22176	C05824	HMDB0000731	115015		0.88		0.0783	0.2527		1.3432	0.9932	0.8824		100	100		Amino Acid	Methionine, Cysteine, SAM and Taurine Metabolism	100000808	1637-71-4	2273	199.969
	462			cystine	LC/MS pos early	56	C00491	HMDB0000192	67678		1.34		0.9161	0.6851		1.3035	1.2948	1.3374		100	100		Amino Acid	Methionine, Cysteine, SAM and Taurine Metabolism	279	56-89-3	2000	241.031
	466			lanthionine	LC/MS pos early	42002			98504		4.01		0.0519	0.222		0.9512	2.1434	4.0101		61	72		Amino Acid	Methionine, Cysteine, SAM and Taurine Metabolism	100003892	3183-08-02	1730	209.059
	468			cysteine sulfinic acid	LC/MS pos early	37443	C00606	HMDB0000996	109		0.83		0.0229	0.1753		1.1981	0.8214	0.8307		78	72		Amino Acid	Methionine, Cysteine, SAM and Taurine Metabolism	100002113	207121-48-0	597	154.017
	470			hypotaurine	LC/MS polar	590	C00519	HMDB0000965	107812		1.35		0.3692	0.4787		1.0396	1.3441	1.3524		100	100		Amino Acid	Methionine, Cysteine, SAM and Taurine Metabolism	358	300-84-5	2763.4	108.012
	471			taurine	LC/MS pos early	2125	C00245	HMDB0000251	1123		1.22		0.1239	0.3026		1.0236	1.2143	1.219		100	100		Amino Acid	Methionine, Cysteine, SAM and Taurine Metabolism	512	107-35-7	660	126.022
	472			N-methyltaurine	LC/MS polar	42989			7882		2.37		0.4456	0.5189		1.256	1.23	2.3652		78	89		Amino Acid	Methionine, Cysteine, SAM and Taurine Metabolism	100004056	107-68-6	1650	138.023
	473			N-acetyltaurine	LC/MS neg	48187		HMDB0240253	159864		1.09		0.1446	0.321		1.0909	1.1556	1.0875		100	100		Amino Acid	Methionine, Cysteine, SAM and Taurine Metabolism	100005466		800	166.018
	476			succinoyltaurine	LC/MS polar	63678					1.03		0.7463	0.6404		0.9928	0.9945	1.0304		100	100		Amino Acid	Methionine, Cysteine, SAM and Taurine Metabolism	100021220		2572	224.023
	483		Urea cycle; Arginine and Proline Metabolism	arginine	LC/MS pos early	1638	C00062	HMDB0000517	6322		0.96		0.1784	0.3629		1.0564	0.9897	0.9553		100	100		Amino Acid	Urea cycle; Arginine and Proline Metabolism	231	1119-34-2	2825	175.119
	485			urea	LC/MS pos early	1670	C00086	HMDB0000294	1176		1		0.5682	0.5776		1.0042	0.979	0.9966		100	100		Amino Acid	Urea cycle; Arginine and Proline Metabolism	533	57-13-6	700	121.072
	487			ornithine	LC/MS pos early	1493	C00077	HMDB0000214	6262		1.04		0.9805	0.6983		1.0518	1.0853	1.0421		100	100		Amino Acid	Urea cycle; Arginine and Proline Metabolism	444	3184-13-2	2800	133.097
	489			3-amino-2-piperidone	LC/MS pos early	62853		HMDB0000323	5200225		1.24		0.0064	0.1182		0.9645	1.2036	1.2427		100	100		Amino Acid	Urea cycle; Arginine and Proline Metabolism	100020361	1892-22-4	2065	115.087
	491			2-oxoarginine*	LC/MS pos early	55072	C03771	HMDB0004225	558		1.64		0.0248	0.1779		0.967	1.4716	1.638		100	100		Amino Acid	Urea cycle; Arginine and Proline Metabolism	100002784	3715-10-04	1760	174.087
	492			citrulline	LC/MS pos early	2132	C00327	HMDB0000904	9750		1.06		0.3332	0.4578		1.0039	1.0487	1.062		100	100		Amino Acid	Urea cycle; Arginine and Proline Metabolism	391	372-75-8	1520	176.103
	493			homoarginine	LC/MS pos early	22137	C01924	HMDB0000670	9085		0.9		0.0296	0.1861		1.0366	0.8982	0.8961		100	100		Amino Acid	Urea cycle; Arginine and Proline Metabolism	100000961	156-86-5	2882	189.135
	494			homocitrulline	LC/MS polar	22138	C02427	HMDB0000679	65072		1.36		0.0834	0.2609		1.0779	1.4612	1.3576		100	100		Amino Acid	Urea cycle; Arginine and Proline Metabolism	100000963	1190-49-4	3006.8	188.104
	495			proline	LC/MS pos early	1898	C00148 C000763	HMDB0000162 HMDB0003411	145742;614;8988		1.05		0.5578	0.5744		0.9835	1.0216	1.0523		100	100		Amino Acid	Urea cycle; Arginine and Proline Metabolism	480	147-85-3	1603	116.071
	498			dimethylarginine (SDMA + ADMA)	LC/MS pos early	36808	C21189 C03626	HMDB0003334 HMDB0001539	123831;169148		0.95		0.0397	0.2048		1.0443	0.9828	0.9467		100	100		Amino Acid	Urea cycle; Arginine and Proline Metabolism	100001810	102783-24-4	2850	203.15
	499			N-acetylarginine	LC/MS pos early	33953	C02562	HMDB0004620	67427		1.03		0.833	0.6629		0.9925	1.0162	1.0273		100	100		Amino Acid	Urea cycle; Arginine and Proline Metabolism	100001266	155-84-0	2245	217.13
	504			N-acetylcitrulline	LC/MS neg	48434	C15532 C02851	HMDB0000856	656979		1.35		0.0436	0.2094		1.1855	1.5918	1.3545		100	100		Amino Acid	Urea cycle; Arginine and Proline Metabolism	100001577	33965-42-3	940	216.099
	508			N-delta-acetylornithine	LC/MS neg	43249	C00437	HMDB0003357	9920500		1.64		0.0742	0.2513		0.8827	1.3253	1.6389		100	100		Amino Acid	Urea cycle; Arginine and Proline Metabolism	100004523		858	173.093
	509			N-alpha-acetylornithine	LC/MS pos early	32984	C00437	HMDB0003357	439232		1.67		0.0986	0.2786		0.8313	1.2027	1.6695		67	78		Amino Acid	Urea cycle; Arginine and Proline Metabolism	100000285	6205-08-09	2000	175.108
	510			N2,N5-diacetylornithine	LC/MS neg	43591			65977		1.62		0.1168	0.2976		0.9312	1.5174	1.6163		100	100		Amino Acid	Urea cycle; Arginine and Proline Metabolism	100004575	39825-23-5	1367	215.104
	512			N-methylhydroxyproline**	LC/MS pos early	62068			9860390		5.01		0.1516	0.33		1.1704	2.0516	5.009		78	94		Amino Acid	Urea cycle; Arginine and Proline Metabolism	100020215		1145	146.081
	513			trans-4-hydroxyproline	LC/MS pos early	32306	C01157	HMDB0000725	5810		1.13		0.6325	0.6011		1.0779	1.1768	1.1296		100	100		Amino Acid	Urea cycle; Arginine and Proline Metabolism	1001	51-35-4	1064	132.066
	515			pro-hydroxy-pro	LC/MS pos early	35127		HMDB0006695	11902893		1.38		0.0055	0.1135		0.9833	1.291	1.3809		100	100		Amino Acid	Urea cycle; Arginine and Proline Metabolism	100001167	18684-24-7	2128	229.118
	518			N-methylproline	LC/MS pos early	37431		HMDB0094696	643474		3.84		0.277	0.4323		1.8764	2.8897	3.8361		100	100		Amino Acid	Urea cycle; Arginine and Proline Metabolism	100001956	475-11-6	1335	130.086
	519			N,N,N-trimethyl-alanylproline betaine (TMAP)	LC/MS pos early	62947		HMDB0240365			0.89		0.1024	0.283		1.2374	0.9819	0.8924		100	100		Amino Acid	Urea cycle; Arginine and Proline Metabolism	100020217		2470	229.155
	522			argininate*	LC/MS pos early	57461		HMDB0003148	160437		1.28		0.3105	0.4544		1.1571	1.2362	1.2842		100	100		Amino Acid	Urea cycle; Arginine and Proline Metabolism	100002769	157-07-3	2150	176.103
	527		Creatine Metabolism	guanidinoacetate	LC/MS polar	43802	C00581	HMDB0000128	763		1.03		0.919	0.6851		0.9907	1.0115	1.0325		100	100		Amino Acid	Creatine Metabolism	344	352-97-6	2884	116.047
	528			creatine	LC/MS pos early	27718	C00300	HMDB0000064	586		1.06		0.9032	0.6851		0.9582	0.9493	1.0611		100	100		Amino Acid	Creatine Metabolism	1221	57-00-1	1947	132.077
	529			creatinine	LC/MS pos early	513	C00791	HMDB0000562	588		0.99		0.63	0.5994		1.0344	1.0219	0.9933		100	100		Amino Acid	Creatine Metabolism	275	60-27-5	2055	114.066
	538		Polyamine Metabolism	N-acetylputrescine	LC/MS pos early	37496	C02714	HMDB0002064	122356		1.07		0.2787	0.4324		1.0988	1.1329	1.0678		100	100		Amino Acid	Polyamine Metabolism	192	18233-70-0	2230	131.118
	544			N-acetyl-isoputreanine	LC/MS pos early	62309			131802901		1.05		0.9373	0.6911		0.945	0.9594	1.0462		100	100		Amino Acid	Polyamine Metabolism	100020487		2305	203.139
	545			spermidine	LC/MS pos early	485	C00315	HMDB0001257	1102		1.76		0.0443	0.2112		1.1064	1.576	1.7564		100	100		Amino Acid	Polyamine Metabolism	50	124-20-9	3355	146.165
	550			(N(1) + N(8))-acetylspermidine	LC/MS pos early	57814	C00612 C01029	HMDB0001276 HMDB0002189	123689;496		0.98		0.4	0.4959		1.096	1.0102	0.9793		100	100		Amino Acid	Polyamine Metabolism	100016038		3080	188.176
	551			acisoga	LC/MS neg	43258		HMDB0061384	129397		1.01		0.6147	0.5951		1.1639	1.065	1.0131		100	100		Amino Acid	Polyamine Metabolism	100004541	106692-36-8	2297	183.114
	556			5-methylthioadenosine (MTA)	LC/MS pos early	1419	C00170	HMDB0001173	439176		0.97		0.2903	0.4408		1.0576	1.0026	0.9677		100	100		Amino Acid	Polyamine Metabolism	212	2457-80-9	2752	298.097
	560			4-acetamidobutanoate	LC/MS neg	1558	C02946	HMDB0003681	18189		1.04		0.5359	0.5607		1.1242	1.1447	1.0436		100	100		Amino Acid	Polyamine Metabolism	1113	3025-96-5	894	144.067
	563		Guanidino and Acetamido Metabolism	4-guanidinobutanoate	LC/MS pos early	15681	C01035	HMDB0003464	500		1.94		0.2453	0.4134		1.0998	1.6145	1.9372		94	94		Amino Acid	Guanidino and Acetamido Metabolism	100000096	463-003;463-00-3	2320	146.092
	564			guanidinosuccinate	LC/MS polar	32446	C03139	HMDB0003157	439918		0.95		0.208	0.3825		1.272	1.1055	0.9549		89	94		Amino Acid	Guanidino and Acetamido Metabolism	100001212	6133-30-8	3550	174.052
	573		Glutathione Metabolism	cysteine-glutathione disulfide	LC/MS pos early	35159	R00900	HMDB0000656	3080690		1.21		0.2631	0.4236		0.9226	1.119	1.2087		100	100		Amino Acid	Glutathione Metabolism	100001437	13081-14-6	2465	427.095
	576			cysteinylglycine	LC/MS pos early	35637	C01419	HMDB0000078	439498		1.01		0.6513	0.6044		1.0829	1.0352	1.0103		100	100		Amino Acid	Glutathione Metabolism	278	19246-18-5	2132	179.048
	577			cysteinylglycine disulfide*	LC/MS pos early	62103		HMDB0000709	22833544		1.04		0.1689	0.3507		0.9699	1.0086	1.0408		100	100		Amino Acid	Glutathione Metabolism	100002466	70555-24-7	2547	298.053
	578			cys-gly, oxidized	LC/MS pos early	18368			333293		1.14		0.0928	0.2728		1.0852	1.2205	1.1421		100	100		Amino Acid	Glutathione Metabolism	1224	7729-20-6	2947	355.074
	579			5-oxoproline	LC/MS neg	1494	C01879 C02237	HMDB0000267	439685;7405		1.04		0.9446	0.6917		1.0772	1.0583	1.0364		100	100		Amino Acid	Glutathione Metabolism	1021	98-79-3	738.5	128.035
	580			2-aminobutyrate	LC/MS pos early	42374	C02356	HMDB0000452	80283		0.96		0.2156	0.3874		1.1676	1.0152	0.9553		100	100		Amino Acid	Glutathione Metabolism	1128	1492-24-6	2059	104.071
	582			2-hydroxybutyrate/2-hydroxyisobutyrate	LC/MS polar	52281	C21297 C05984	HMDB0000729 HMDB00008	4277439;440864		0.92		0.115	0.2976		1.1541	0.9476	0.9208		100	100		Amino Acid	Glutathione Metabolism	100008928		1258	103.04
	632	Peptide	Gamma-glutamyl Amino Acid	gamma-glutamylalanine	LC/MS pos early	37063	C03738	HMDB0029142	440103		1.85		0.6569	0.6049		0.6755	0.6739	1.847		56	50		Peptide	Gamma-glutamyl Amino Acid	100001843	5875-41-2	1986	219.098
	634			gamma-glutamylglutamate	LC/MS pos early	36738	C05282	HMDB0011737	92865		0.99		0.4568	0.5226		1.0292	0.9679	0.9942		100	100		Peptide	Gamma-glutamyl Amino Acid	331	1116-22-9	1775	277.103
	635			gamma-glutamylglutamine	LC/MS pos early	2730	C05283	HMDB0011738	150914		0.97		0.2759	0.4317		1.0465	1.0004	0.9658		100	100		Peptide	Gamma-glutamyl Amino Acid	1140	10148-81-9	1430	276.119
	636			gamma-glutamylglycine	LC/MS pos early	33949		HMDB0011667	100099		0.97		0.3152	0.457		1.0573	1.0085	0.971		100	100		Peptide	Gamma-glutamyl Amino Acid	100001294	1948-29-4	1535	205.082
	637			gamma-glutamylhistidine	LC/MS pos early	18245		HMDB0029151	7017195		1.02		0.7783	0.6468		0.9964	1.0044	1.0201		100	100		Peptide	Gamma-glutamyl Amino Acid	1235	37460-15-4	2740	285.119
	638			gamma-glutamylisoleucine*	LC/MS pos early	34456		HMDB0011170	22885096		1.11		0.3504	0.4715		0.946	1.0043	1.1067		100	100		Peptide	Gamma-glutamyl Amino Acid	100001485		2940	261.144
	639			gamma-glutamylleucine	LC/MS pos early	18369		HMDB0011171	151023		1.04		0.8639	0.6733		1.0299	1.0311	1.0361		100	100		Peptide	Gamma-glutamyl Amino Acid	1268	2566-39-4	2991	261.144
	640			gamma-glutamyl-alpha-lysine	LC/MS pos early	55015			65254		0.91		0.0197	0.1648		1.0734	0.9652	0.9065		100	100		Peptide	Gamma-glutamyl Amino Acid	100010901		2784	276.155
	641			gamma-glutamyl-epsilon-lysine	LC/MS pos early	33934		HMDB0003869	7015685		0.88		0.0175	0.1648		1.1202	0.9744	0.8796		100	100		Peptide	Gamma-glutamyl Amino Acid	100001262	17105-15-6	2725	276.155
	642			gamma-glutamylmethionine	LC/MS pos early	44872		HMDB0029155	7009567		1		0.3604	0.4755		1.0875	0.9968	0.997		100	100		Peptide	Gamma-glutamyl Amino Acid	100001313	17663-87-5	2640	279.101
	643			gamma-glutamylphenylalanine	LC/MS neg	33422		HMDB0000594	111299		1.05		0.6782	0.6155		1.021	1.0601	1.0495		100	100		Peptide	Gamma-glutamyl Amino Acid	100000491	7432-24-8	1825	293.114
	644			gamma-glutamylthreonine	LC/MS pos early	33364		HMDB0029159	76078708		0.95		0.2096	0.3825		1.1232	1.046	0.9532		100	100		Peptide	Gamma-glutamyl Amino Acid	100001314	5652-48-2	1750	249.108
	645			gamma-glutamyltryptophan	LC/MS neg	33947		HMDB0029160	3989307		0.98		0.4206	0.5085		1.0241	0.9868	0.9797		100	100		Peptide	Gamma-glutamyl Amino Acid	100001295	66471-20-3	1960	332.125
	646			gamma-glutamyltyrosine	LC/MS neg	2734		HMDB0011741	94340		1.19		0.4377	0.5162		0.9829	1.0364	1.191		100	100		Peptide	Gamma-glutamyl Amino Acid	1102	7432-23-7	1240	309.109
	647			gamma-glutamylvaline	LC/MS pos early	43829		HMDB0011172	7015683		1.09		0.3163	0.4574		0.9338	0.9736	1.0895		100	100		Peptide	Gamma-glutamyl Amino Acid	100001126	2746-34-1	2700	247.129
	649			gamma-glutamylcitrulline*	LC/MS pos early	62104					1.05		0.5806	0.582		1.0221	1.0597	1.0464		100	100		Peptide	Gamma-glutamyl Amino Acid	100020241		1644	305.146
	650			gamma-glutamyl-2-aminobutyrate	LC/MS pos early	37092					1.05		0.5686	0.5776		1.1924	1.0206	1.0456		83	83		Peptide	Gamma-glutamyl Amino Acid	100001502	16869-42-4	2380	233.113
	745		Dipeptide	cyclo(gly-pro)	LC/MS pos early	37077			193540		1.33		0.3238	0.4574		1.1747	1.3723	1.3286		89	83		Peptide	Dipeptide	100001946	3705-27-9	1349	155.082
	853			isoleucylglycine	LC/MS neg	40008		HMDB0028907	342532		1.13		0.9429	0.6911		1.2678	1.0835	1.1324		100	100		Peptide	Dipeptide	100003169	868-28-0	1992	187.109
	872			leucylglycine	LC/MS neg	40045		HMDB0028929	79070		1.42		0.5717	0.5787		1.1155	1.2914	1.4151		100	100		Peptide	Dipeptide	100003185	686-50-0	2050	187.109
	947			prolylglycine	LC/MS pos early	40703		HMDB0011178	6426709		1.54		0.5446	0.566		0.9904	1.125	1.5415		94	100		Peptide	Dipeptide	100003674	2578-57-6	2136	173.092
	1033			valylglutamine	LC/MS neg	42079		HMDB0029125	5253209		1.64		0.1813	0.3655		0.9545	1.273	1.6391		61	94		Peptide	Dipeptide	100003640	42854-54-6	1484	244.13
	1034			valylglycine	LC/MS neg	40475		HMDB0029127	136487		2.53		0.056	0.2276		0.939	1.5905	2.5283		100	100		Peptide	Dipeptide	100003641	686-43-1	1506	173.093
	1157		Fibrinogen Cleavage Peptide	Fibrinopeptide A*	LC/MS neg	57709			25081464		1.38		0.6722	0.6143		1.7986	0.438	1.3812		17	17		Peptide	Fibrinogen Cleavage Peptide	100001322	25422-31-5	2474	766.835
	1165			Fibrinopeptide A, des-ala(1)*	LC/MS neg	31548			132993922		1.27		0.5473	0.5682		4.3516	0.5254	1.2747		28	22		Peptide	Fibrinogen Cleavage Peptide	100001323		2535	731.317
	1166			Fibrinopeptide A, phosphono-ser(3)*	LC/MS neg	57712			132993923		1					1	1	1		6	0		Peptide	Fibrinogen Cleavage Peptide	100001324	886023-52-5	2016	806.818
	1180			Fibrinopeptide B (1-13)**	LC/MS neg	62813					0.95		0.3313	0.4574		0.1695	0.0657	0.9463		6	6		Peptide	Fibrinogen Cleavage Peptide	100020908		2482	696.772
	1184		Acetylated Peptides	phenylacetylcarnitine	LC/MS pos early	48425			101724840		0.87		0.0422	0.2077		1.3063	1.0432	0.8662		100	94		Peptide	Acetylated Peptides	100006108	287108-21-8	3092	280.154
	1186			phenylacetylglutamate	LC/MS neg	52925		HMDB0059772	11579826		0.8		0.0106	0.1439		1.8658	1.4938	0.8018		100	100		Peptide	Acetylated Peptides	100009045		1570	264.088
	1187			phenylacetylglutamine	LC/MS neg	35126	C04148	HMDB0006344	92258		0.8		0.0119	0.1439		1.1605	0.9511	0.8006		100	100		Peptide	Acetylated Peptides	100001417	28047-15-6	2330	263.104
	1189			4-hydroxyphenylacetylglutamine	LC/MS neg	55017					1.09		0.973	0.6967		1.2973	1.4165	1.0861		100	100		Peptide	Acetylated Peptides	100010850		1650	279.099
	1190			phenylacetylglycine	LC/MS neg	33945	C05598	HMDB0000821	68144		1.59		0.3505	0.4715		0.8382	0.8998	1.5928		61	78		Peptide	Acetylated Peptides	100001275	500-98-1	2375	192.067
	1219		Modified Peptides	N,N-dimethyl-pro-pro	LC/MS pos early	64571					0.91		0.0921	0.2728		1.1483	1.0028	0.9141		100	100		Peptide	Modified Peptides	100022041		2500	241.155
	1220	Carbohydrate	Glycolysis, Gluconeogenesis, and Pyruvate Metabolism	1,5-anhydroglucitol (1,5-AG)	LC/MS neg	20675	C07326	HMDB0002712	64960		0.99		0.4942	0.537		0.9662	0.9316	0.9866		100	100		Carbohydrate	Glycolysis, Gluconeogenesis, and Pyruvate Metabolism	100000580	154-58-5	802	163.061
	1223			glucose	LC/MS polar	48152	C00031	HMDB0000122	5793		0.98		0.4448	0.5189		1.0334	1.0123	0.9843		100	100		Carbohydrate	Glycolysis, Gluconeogenesis, and Pyruvate Metabolism	572	50-99-7	2342	225.062
	1237			3-phosphoglycerate	LC/MS pos early	1414	C00597	HMDB0000807	724		1.53		0.6961	0.6222		1.0904	1.2707	1.5273		100	100		Carbohydrate	Glycolysis, Gluconeogenesis, and Pyruvate Metabolism	132	80731-10-8	590	187
	1239			pyruvate	LC/MS polar	48990	C00022	HMDB0000243	1060		1.09		0.517	0.5509		1.0042	1.0444	1.0875		100	100		Carbohydrate	Glycolysis, Gluconeogenesis, and Pyruvate Metabolism	823	127-17-3	1083	87.0088
	1240			lactate	LC/MS polar	527	C00186	HMDB0000190	612		1.11		0.6347	0.6019		1.0943	1.1547	1.1111		100	100		Carbohydrate	Glycolysis, Gluconeogenesis, and Pyruvate Metabolism	482	79-33-4	1469	89.0244
	1243			glycerate	LC/MS polar	1572	C00258	HMDB0006372 HMDB0000139	752;439194		0.94		0.1482	0.3267		1.0156	0.9414	0.9447		100	100		Carbohydrate	Glycolysis, Gluconeogenesis, and Pyruvate Metabolism	1052	600-19-1	2070.4	105.019
	1262		Pentose Metabolism	ribitol	LC/MS polar	15772	C00532 C01904 C00474 C00379	HMDB0002917 HMDB0000508 HMDB0001851 HMDB0000568	6912		1.02		0.8004	0.6495		1.0543	1.0416	1.0181		100	100		Carbohydrate	Pentose Metabolism	100000406	488-81-3	1789.6	151.061
	1263			ribonate	LC/MS polar	27731	C01685	HMDB0000867	5460677		1.12		0.177	0.3619		0.9725	1.0714	1.121		100	100		Carbohydrate	Pentose Metabolism	100001007	5336-08-03	2425	165.04
	1267			xylose	LC/MS polar	15581	C00181	HMDB0000098	135191		1.57		0.4619	0.5249		1.862	1.8978	1.5718		100	100		Carbohydrate	Pentose Metabolism	826	609-06-3	1727	195.051
	1269			arabinose	LC/MS polar	575	C00216	HMDB0029942	66308		1.39		0.436	0.5152		0.9566	1.0482	1.3927		100	100		Carbohydrate	Pentose Metabolism	828	28697-53-2	1804.5	195.051
	1277			arabitol/xylitol	LC/MS polar	48885	C00542 C01904 C00379	HMDB0002917 HMDB0001851 HMDB0000568	6912;94154		1.12		0.0661	0.2395		1.0328	1.1404	1.1157		100	100		Carbohydrate	Pentose Metabolism	100006430		1932.4	151.061
	1283			arabonate/xylonate	LC/MS polar	48255	C00502 C05411	HMDB0000539	122045;6602431		1.07		0.5396	0.5627		1.1773	1.177	1.0715		100	100		Carbohydrate	Pentose Metabolism	100006115		2700	165.04
	1287			sedoheptulose	LC/MS polar	53237	C02076	HMDB0003219	5459879		0.98		0.3997	0.4959		0.9058	0.8345	0.9833		50	50		Carbohydrate	Pentose Metabolism	100002619	3019-74-7	2255	209.067
	1289			lyxonate	LC/MS polar	61858					1.23		0.8219	0.6594		1.0515	1.0751	1.2289		94	94		Carbohydrate	Pentose Metabolism	100019968		2350	165.04
	1294		Glycogen Metabolism	maltotetraose	LC/MS neg	15910	C02052	HMDB0001296	439639		1.44		0.3313	0.4574		0.2032	0.2917	1.4358		6	6		Carbohydrate	Glycogen Metabolism	100000275	34612-38-9	910	665.215
	1299			maltose	LC/MS polar	15586	C00208	HMDB0000163	10991489		3.73		0.4024	0.4976		1.2106	1.6794	3.7309		100	100		Carbohydrate	Glycogen Metabolism	913	6363-53-7	3329.4	387.114
	1325		Disaccharides and Oligosaccharides	sucrose	LC/MS neg	1519	C00089	HMDB0000258	5988		2.07		0.0622	0.2321		1.0632	1.513	2.0692		100	100		Carbohydrate	Disaccharides and Oligosaccharides	935	57-50-1	865	341.109
	1346		Fructose, Mannose and Galactose Metabolism	fructose	LC/MS polar	48195	C00095	HMDB0000660	2723872		1.36		0.5675	0.5776		1.538	1.5928	1.3561		100	100		Carbohydrate	Fructose, Mannose and Galactose Metabolism	878	57-48-7	2065	225.062
	1351			mannitol/sorbitol	LC/MS polar	46142	C00392 C00794	HMDB0000247 HMDB0000765	6251;5780		1.4		0.7284	0.6336		2.4036	1.62	1.402		100	100		Carbohydrate	Fructose, Mannose and Galactose Metabolism	100001740		2320	181.072
	1352			mannose	LC/MS polar	48153	C00159 C02209 C00936	HMDB0000169	185698;82308;18950;439680		0.93		0.1155	0.2976		1.0697	0.9294	0.9279		100	100		Carbohydrate	Fructose, Mannose and Galactose Metabolism	803	3458-28-4	2200	225.062
	1372			galactonate	LC/MS polar	27719	C15930 C00880	HMDB0000565	12310779;128869		1.83		0.5136	0.5488		1.3336	1.3632	1.8304		100	100		Carbohydrate	Fructose, Mannose and Galactose Metabolism	100001026	299-28-5	3085	195.051
	1406		Aminosugar Metabolism	glucuronate	LC/MS polar	15443	C16245	HMDB0000127	441478;94715;23677976;65041;444791		0.96		0.2441	0.4134		1.1195	1.0296	0.9563		100	100		Carbohydrate	Aminosugar Metabolism	100000257	207300-70-7	3233.3	193.035
	1418			N-acetylneuraminate	LC/MS pos early	32377	C00270	HMDB0000230	439197		1.1		0.1043	0.283		1.0077	1.098	1.1017		100	100		Carbohydrate	Aminosugar Metabolism	1162	131-48-6	660	310.113
	1430			N-acetylglucosaminylasparagine	LC/MS pos early	48149	C04540	HMDB0000489	123826		1.05		0.7703	0.6453		1.0959	1.0959	1.0482		100	100		Carbohydrate	Aminosugar Metabolism	1215	2776-93-4	1212	336.14
	1431			erythronate*	LC/MS polar	42420		HMDB0000613	2781043		1.02		0.7236	0.6336		1.0372	1.048	1.0186		100	100		Carbohydrate	Aminosugar Metabolism	100001320	88759-55-1	2186	135.03
	1433			N-acetylglucosamine/N-acetylgalactosamine	LC/MS pos early	46539	C01074	HMDB0000212 HMDB0000215	84265;439174		1.34		0.9383	0.6911		1.054	1.0389	1.3431		100	100		Carbohydrate	Aminosugar Metabolism	100006435		715	222.097
	1435		Advanced Glycation End-product	N6-carboxymethyllysine	LC/MS pos early	36713		HMDB0240347	123800		1.12		0.8686	0.6743		1.0021	0.9939	1.1242		94	94		Carbohydrate	Advanced Glycation End-product	100001768	5746-04-03	2500	205.118
	1439	Energy	TCA Cycle	citrate	LC/MS neg	1564	C00158	HMDB0000094	311		1.02		0.6142	0.5951		0.9818	0.9979	1.0174		100	100		Energy	TCA Cycle	1124	77-92-9	582	191.02
	1441			aconitate [cis or trans]	LC/MS neg	46173	C02341 C004174	HMDB0000958 HMDB000072	643757;444212		0.95		0.1922	0.371		1.0417	0.9755	0.9541		100	100		Energy	TCA Cycle	100001359		580	173.009
	1444			isocitric lactone	LC/MS polar	54724			98259		0.94		0.2037	0.3812		1.313	0.9172	0.9405		100	100		Energy	TCA Cycle	100009239	4702-32-3	2970	173.009
	1445			alpha-ketoglutarate	LC/MS polar	528	C00026	HMDB0000208	51		0.99		0.5914	0.5842		1.0181	1.0129	0.9913		100	100		Energy	TCA Cycle	93	305-72-6;328-50-7;22202-68-2	2700	145.014
	1447			succinylcarnitine (C4-DC)	LC/MS pos early	37058		HMDB0061717	71464481		1.07		0.7831	0.6468		1.0316	1.1024	1.0714		100	100		Energy	TCA Cycle	100001948	256928-74-2	2291	262.129
	1448			succinate	LC/MS polar	1437	C00042	HMDB0000254	1110		1.02		0.8431	0.6653		1.0349	1.0438	1.0162		100	100		Energy	TCA Cycle	252	110-15-6	3149	117.019
	1449			fumarate	LC/MS polar	1643	C00122	HMDB0000134	444972		1.01		0.6458	0.6031		1.0573	1.0509	1.0076		100	100		Energy	TCA Cycle	330	100-17-8	3084	115.004
	1451			malate	LC/MS neg	1303	C00497 C00149 C00711	HMDB0000744 HMDB0031518 HMDB0000156	525		1.04		0.9081	0.6851		1.0455	1.0759	1.0445		100	100		Energy	TCA Cycle	409	6915-15-7	615.6	133.014
	1460			2-methylcitrate/homocitrate	LC/MS neg	52282	C01251	HMDB0003518 HMDB0000379	515;439459		1.26		0.1917	0.371		0.9832	0.7597	1.2579		83	83		Energy	TCA Cycle	100008929		575	205.035
	1462			citraconate/glutaconate	LC/MS polar	47076	C02226 C02214	HMDB0000620 HMDB0000634	643798;5280498		6.98		0.0039	0.1067		0.7785	1.8468	6.9769		100	100		Energy	TCA Cycle	100006438		2600	129.019
	1468		Oxidative Phosphorylation	phosphate	LC/MS pos early	42109	C00009	HMDB0001429	1061		1.03		0.1786	0.3629		0.9679	0.9983	1.0341		100	100		Energy	Oxidative Phosphorylation	461	7664-38-2	576	98.9842
	1472	Lipid	Fatty Acid Synthesis	malonate	LC/MS polar	15872	C00383	HMDB0000691	867		1.19		0.8963	0.6831		0.9722	1.0039	1.1908		100	100		Lipid	Fatty Acid Synthesis	818	141-82-2;26522-22-85-0	3447	103.004
	1487		Short Chain Fatty Acid	butyrate/isobutyrate (4:0)	LC/MS neg	40605	C00246	HMDB0000039	264		0.97		0.2917	0.4422		1.0752	0.959	0.9657		100	100		Lipid	Short Chain Fatty Acid	1143	109-92-6	1062	87.0452
	1488			valerate (5:0)	LC/MS neg	33443	C00803	HMDB0000892	7991		1.31		0.2588	0.4221		0.7659	0.9039	1.3131		61	72		Lipid	Short Chain Fatty Acid	1136	109-52-4	1718	101.061
	1489		Medium Chain Fatty Acid	caproate (6:0)	LC/MS neg	32489	C01585	HMDB0000535	8892		1.02		0.7089	0.6267		1.1299	1.0601	1.0212		100	100		Lipid	Medium Chain Fatty Acid	926	142-62-1	2713.7	115.076
	1490			heptanoate (7:0)	LC/MS neg	1644	C17714	HMDB0000666	8094		1.09		0.3551	0.4722		1.0091	1.0866	1.0925		100	100		Lipid	Medium Chain Fatty Acid	925	111-14-8	3670	129.092
	1491			caprylate (8:0)	LC/MS neg	32492	C06423	HMDB0000482	379		1.26		0.7597	0.6432		1.4232	1.2191	1.2574		100	100		Lipid	Medium Chain Fatty Acid	932	124-07-2	4362	143.108
	1494			caprate (10:0)	LC/MS neg	1642	C01571	HMDB0000511	2969		1.31		0.5139	0.5488		1.2889	1.3513	1.3088		100	100		Lipid	Medium Chain Fatty Acid	888	334-48-5	5090.7	171.139
	1495			cis-4-decenoate (10:1n6)*	LC/MS neg	62873		HMDB0004980	5282726		1		0.34	0.4637		1.1772	1.1194	1.0001		100	100		Lipid	Medium Chain Fatty Acid	100002796	505-90-8	4890	169.123
	1498			(2 or 3)-decenoate (10:1n7 or n8)	LC/MS neg	63436					0.99		0.2391	0.4061		1.2145	0.9761	0.989		94	94		Lipid	Medium Chain Fatty Acid	100021502		4990	169.123
	1500			10-undecenoate (11:1n1)	LC/MS neg	32497	C13910	HMDB0033724	14891		1.11		0.786	0.6468		1.0969	1.0274	1.1118		100	100		Lipid	Medium Chain Fatty Acid	100001197	1333-28-4	5085.8	183.139
	1502			laurate (12:0)	LC/MS neg	1645	C02679	HMDB0000638	3893		1.52		0.7418	0.6386		1.1377	1.2615	1.5248		100	100		Lipid	Medium Chain Fatty Acid	181	143-07-7	5300	199.17
	1504			5-dodecenoate (12:1n7)	LC/MS neg	33968		HMDB0000529	5312378		1.74		0.7028	0.6259		1.7204	1.5423	1.74		100	100		Lipid	Medium Chain Fatty Acid	100001232	2430-94-6	5224	197.155
	1507		Long Chain Saturated Fatty Acid	myristate (14:0)	LC/MS neg	1365	C06424	HMDB0000806	11005		1.71		0.8304	0.6622		1.2667	1.3736	1.7082		100	100		Lipid	Long Chain Saturated Fatty Acid	519	544-63-8	5440	227.202
	1509			pentadecanoate (15:0)	LC/MS neg	1361	C16537	HMDB0000826	13849		1.63		0.6062	0.5905		1.1242	1.3242	1.6292		94	100		Lipid	Long Chain Saturated Fatty Acid	980	1002-84-2;10002-84-2	5521	241.217
	1510			palmitate (16:0)	LC/MS neg	1336	C00249	HMDB0000220	985		1.55		0.7897	0.6468		1.1302	1.2815	1.5463		100	100		Lipid	Long Chain Saturated Fatty Acid	424	57-10-3	5618	255.233
	1512			margarate (17:0)	LC/MS neg	1121		HMDB0002259	10465		1.71		0.8455	0.6653		1.0809	1.2339	1.7145		100	100		Lipid	Long Chain Saturated Fatty Acid	891	506-12-7	5731	269.249
	1514			stearate (18:0)	LC/MS neg	1358	C01530	HMDB0000827	5281		1.45		0.5901	0.584		0.9977	1.1742	1.4486		100	100		Lipid	Long Chain Saturated Fatty Acid	439	57-11-4	5872	283.264
	1516			nonadecanoate (19:0)	LC/MS neg	1356	C16535	HMDB0000772	12591		1.5		0.4474	0.5189		1.0286	1.274	1.5029		100	100		Lipid	Long Chain Saturated Fatty Acid	892	646-30-0	6068	297.28
	1517			arachidate (20:0)	LC/MS neg	1118	C06425	HMDB0002212	10467		1.48		0.2835	0.4352		0.997	1.2849	1.477		100	100		Lipid	Long Chain Saturated Fatty Acid	893	506-30-9	6240	311.296
	1519			behenate (22:0)*	LC/MS neg	12125	C08281	HMDB0000944	8215		1.76		0.1164	0.2976		0.9434	1.4557	1.7567		100	100		Lipid	Long Chain Saturated Fatty Acid	314	112-85-6	6745	339.327
	1526		Long Chain Monounsaturated Fatty Acid	myristoleate (14:1n5)	LC/MS neg	32418	C08322	HMDB0002000	5281119		1.34		0.3591	0.4749		1.835	1.475	1.3356		100	100		Lipid	Long Chain Monounsaturated Fatty Acid	100001198	544-64-9	5346.9	225.186
	1529			palmitoleate (16:1n7)	LC/MS neg	33447	C08362	HMDB0003229	445638		1.65		0.4712	0.5283		2.2243	1.7088	1.6459		100	100		Lipid	Long Chain Monounsaturated Fatty Acid	452	373-49-9	5475	253.217
	1531			10-heptadecenoate (17:1n7)	LC/MS neg	33971		HMDB0060038	5312435		1.7		0.7188	0.6316		1.5556	1.4408	1.7011		100	100		Lipid	Long Chain Monounsaturated Fatty Acid	100001278	29743-97-3	5555	267.233
	1533			oleate/vaccenate (18:1)	LC/MS neg	52285	C01712 C08367 C00712 C21944	HMDB0000207 HMDB0000573 HMDB0003231 HMDB0240219	637517;445639;5281127;5282761		1.6		0.8764	0.6769		1.1398	1.1646	1.6028		100	100		Lipid	Long Chain Monounsaturated Fatty Acid	100008930		5655	281.249
	1540			10-nonadecenoate (19:1n9)	LC/MS neg	33972		HMDB0013622	5312513		1.66		0.8814	0.6786		1.2595	1.3177	1.6594		100	100		Lipid	Long Chain Monounsaturated Fatty Acid	100001277	73033-09-7	5780	295.264
	1543			eicosenoate (20:1)	LC/MS neg	33587	C16526	HMDB0002231 HMDB0062436	5282769;5282768;94159		1.59		0.9274	0.6878		1.2741	1.2718	1.5938		100	100		Lipid	Long Chain Monounsaturated Fatty Acid	100001335		5950	309.28
	1547			erucate (22:1n9)	LC/MS neg	1552	C08316	HMDB0002068	8216;5281116		1.32		0.9758	0.6971		1.1648	1.293	1.3177		100	100		Lipid	Long Chain Monounsaturated Fatty Acid	1087	112-86-7	6355.6	337.311
	1550		Long Chain Polyunsaturated Fatty Acid (n3 and n6)	tetradecadienoate (14:2)*	LC/MS neg	62850		HMDB0000560	5312409		1.13		0.3455	0.4693		1.3949	1.179	1.1253		100	100		Lipid	Long Chain Polyunsaturated Fatty Acid (n3 and n6)	100020343	39039-37-7	5292	223.17
	1557			stearidonate (18:4n3)	LC/MS neg	33969	C16300	HMDB0006547	5312508		1.63		0.6109	0.5938		1.5038	1.3909	1.6316		100	100		Lipid	Long Chain Polyunsaturated Fatty Acid (n3 and n6)	100001229	111174-40-4	5395	275.202
	1560			eicosapentaenoate (EPA; 20:5n3)	LC/MS neg	18467	C06428	HMDB0001999	446284		1.63		0.7275	0.6336		1.499	1.6097	1.6317		100	100		Lipid	Long Chain Polyunsaturated Fatty Acid (n3 and n6)	2050	10-2005-9;10417-94-4	5450	301.217
	1561			heneicosapentaenoate (21:5n3)	LC/MS neg	57658			11998573		7.21		0.4078	0.5015		0.9677	2.5886	7.2089		50	61		Lipid	Long Chain Polyunsaturated Fatty Acid (n3 and n6)	100015797	24257-10-1	5514	315.233
	1562			docosapentaenoate (n3 DPA; 22:5n3)	LC/MS neg	32504	C16513	HMDB0001976 HMDB0006528	6441454		1.87		0.9644	0.6962		1.5385	1.6902	1.8659		100	100		Lipid	Long Chain Polyunsaturated Fatty Acid (n3 and n6)	100001181	2234-74-4	5571	329.249
	1563			docosahexaenoate (DHA; 22:6n3)	LC/MS neg	44675	C06429	HMDB0002183	445580		2		0.7067	0.6265		1.1884	1.6134	1.9963		100	100		Lipid	Long Chain Polyunsaturated Fatty Acid (n3 and n6)	100000665	6217-54-5	5525	327.233
	1564			docosatrienoate (22:3n3)	LC/MS neg	32417	C16534	HMDB0002823	5312556		1.74		0.8812	0.6786		1.3426	1.3242	1.7391		94	100		Lipid	Long Chain Polyunsaturated Fatty Acid (n3 and n6)	100001195	59708-86-0	5823	333.28
	1565			nisinate (24:6n3)	LC/MS neg	57810		HMDB0013025	11792612		2.73		0.6916	0.6199		1.0439	1.6457	2.7344		61	67		Lipid	Long Chain Polyunsaturated Fatty Acid (n3 and n6)	100015785	68378-49-4	5657	355.264
	1566			hexadecadienoate (16:2n6)	LC/MS neg	57652		HMDB0000477	13932172		1.15		0.2218	0.3916		1.9722	1.2805	1.146		100	100		Lipid	Long Chain Polyunsaturated Fatty Acid (n3 and n6)	100009394	28290-73-5	5398	251.202
	1567			linoleate (18:2n6)	LC/MS neg	1105	C01595	HMDB0000673 HMDB0006270	5280450		1.56		0.763	0.6443		1.2376	1.2726	1.5581		100	100		Lipid	Long Chain Polyunsaturated Fatty Acid (n3 and n6)	180	60-33-3	5535	279.233
	1569			linolenate [alpha or gamma; (18:3n3 or 6)]	LC/MS neg	34035	C06426 C06427	HMDB0001388 HMDB0003073	5280933;5280934		1.38		0.4784	0.5291		1.2733	1.1733	1.3843		100	100		Lipid	Long Chain Polyunsaturated Fatty Acid (n3 and n6)	100001337		5450	277.217
	1570			dihomo-linoleate (20:2n6)	LC/MS neg	17805	C16525	HMDB0005060	6439848		1.67		0.9753	0.6971		1.4191	1.3958	1.6749		100	100		Lipid	Long Chain Polyunsaturated Fatty Acid (n3 and n6)	1231	2091-39-6	5730	307.264
	1572			dihomo-linolenate (20:3n3 or n6)	LC/MS neg	35718	C03242	HMDB0002925	5280581		1.39		0.8446	0.6653		1.1251	1.1352	1.3922		100	100		Lipid	Long Chain Polyunsaturated Fatty Acid (n3 and n6)	100001739	17046-59-2	5596	305.249
	1573			arachidonate (20:4n6)	LC/MS neg	1110	C00219	HMDB0001043	444899		1.39		0.771	0.6453		1.2931	1.2992	1.3898		100	100		Lipid	Long Chain Polyunsaturated Fatty Acid (n3 and n6)	229	506-32-1	5535	303.233
	1574			docosatrienoate (22:3n6)*	LC/MS neg	57467			75955220		3.78		0.469	0.5281		0.7204	1.0729	3.7849		50	67		Lipid	Long Chain Polyunsaturated Fatty Acid (n3 and n6)	100015762		5850	333.28
	1575			adrenate (22:4n6)	LC/MS neg	32980	C16527	HMDB0002226	5497181;5282844		1.83		0.8914	0.6831		1.6534	1.699	1.834		100	100		Lipid	Long Chain Polyunsaturated Fatty Acid (n3 and n6)	100001193	2091-25-0	5678	331.264
	1576			docosapentaenoate (n6 DPA; 22:5n6)	LC/MS neg	37478	C16513	HMDB0001976	6441454		1.81		0.6813	0.6166		1.0604	1.263	1.8114		100	100		Lipid	Long Chain Polyunsaturated Fatty Acid (n3 and n6)	100001580	25182-74-5	5624.5	329.249
	1577			docosadienoate (22:2n6)	LC/MS neg	32415	C16533	HMDB0061714	5282807		1.54		0.5915	0.5842		1.2391	1.5042	1.5384		100	100		Lipid	Long Chain Polyunsaturated Fatty Acid (n3 and n6)	100001182	7370-49-2	6034	335.296
	1579			mead acid (20:3n9)	LC/MS neg	35174		HMDB0010378	5312531		1.37		0.6359	0.6019		1.6391	1.4942	1.3711		100	100		Lipid	Long Chain Polyunsaturated Fatty Acid (n3 and n6)	100001472	20590-32-3	5650	305.249
	1637		Fatty Acid, Branched	(12 or 13)-methylmyristate (a15:0 or i15:0)	LC/MS neg	38293		HMDB0061707	151014		1.81		0.6509	0.6044		1.1828	1.6423	1.8148		100	100		Lipid	Fatty Acid, Branched	100002344	2485-71-4	5499	241.217
	1642			(14 or 15)-methylpalmitate (a17:0 or i17:0)	LC/MS neg	38768	C16995	HMDB0061859	8181;17903417		1.61		0.8944	0.6831		1.2346	1.4224	1.6065		100	100		Lipid	Fatty Acid, Branched	100002945		5695	269.249
	1643			cis-3,4-methyleneheptanoate	LC/MS neg	64390					1.16		0.3378	0.4624		1.0653	1.1338	1.1562		100	100		Lipid	Fatty Acid, Branched	100021727		3679	141.092
	1648			(16 or 17)-methylstearate (a19:0 or i19:0)	LC/MS neg	38296		HMDB0037397	3083779		1.53		0.7412	0.6386		1.0774	1.2188	1.5272		100	100		Lipid	Fatty Acid, Branched	100002356	2724-59-6	5993	297.28
	1652			pristanate	LC/MS neg	38271		HMDB0000795	123929		2.03		0.095	0.2742		0.8815	1.4097	2.0281		94	94		Lipid	Fatty Acid, Branched	477	1189-37-3	5773	297.28
	1654			2-hydroxyphytanate*	LC/MS neg	61702		HMDB0061666	189026		1.96		0.0045	0.1067		0.8319	1.4258	1.9632		100	100		Lipid	Fatty Acid, Branched	100004414	14721-68-7	5751	327.29
	1659		Fatty Acid, Dicarboxylate	glutarate (C5-DC)	LC/MS polar	396	C00489	HMDB0000661	743;4418048		0.93		0.1189	0.2988		1.4343	1.2193	0.9281		100	100		Lipid	Fatty Acid, Dicarboxylate	339	110-94-1	2900	131.035
	1662			3-methylglutarate/2-methylglutarate	LC/MS polar	54676		HMDB0000752 HMDB0000422	12046;12284		1.03		0.7923	0.6468		1.056	1.065	1.032		100	100		Lipid	Fatty Acid, Dicarboxylate	100010834		2832	145.051
	1663			2-hydroxyglutarate	LC/MS pos early	37253	C02630	HMDB0059655	43		1.51		0.0097	0.1418		0.8765	1.2235	1.5089		100	100		Lipid	Fatty Acid, Dicarboxylate	100002070	40951-21-1	958	131.034
	1664			4-hydroxy-2-oxoglutaric acid	LC/MS polar	40062	C01127	HMDB0002070	599		1.13		0.5613	0.5744		1.0182	1.0546	1.128		100	100		Lipid	Fatty Acid, Dicarboxylate	100002537	1187-99-1	3073	161.009
	1667			2-hydroxyadipate	LC/MS polar	31934	C02360	HMDB0000321	193530		0.99		0.2304	0.4015		1.7284	0.9042	0.9944		78	56		Lipid	Fatty Acid, Dicarboxylate	100001153	18294-85-4	3000	161.046
	1668			3-hydroxyadipate	LC/MS polar	62069		HMDB0000345	151913		0.99		0.3394	0.4637		1.1144	0.9813	0.9862		94	100		Lipid	Fatty Acid, Dicarboxylate	100004396		3131	161.046
	1669			3-methyladipate	LC/MS polar	36749		HMDB0000555	12292		1.49		0.2058	0.3812		1.0363	1.4219	1.4867		100	100		Lipid	Fatty Acid, Dicarboxylate	100001765	3058-01-03	2865	159.066
	1671			maleate	LC/MS polar	20676	C01384	HMDB0000176	444266		1.94		0.0904	0.2718		1.0955	1.6318	1.9446		100	100		Lipid	Fatty Acid, Dicarboxylate	100000707	110-16-7	2640	115.004
	1673			pimelate (C7-DC)	LC/MS polar	15704	C02656	HMDB0000857	385		1.33		0.2506	0.4157		1.1473	1.2462	1.3323		100	100		Lipid	Fatty Acid, Dicarboxylate	100000101	111-16-0	2745	159.066
	1674			heptenedioate (C7:1-DC)*	LC/MS polar	61866					1.04		0.6951	0.6219		1.0864	1.0102	1.0411		100	100		Lipid	Fatty Acid, Dicarboxylate	100019981		2816	157.051
	1676			suberate (C8-DC)	LC/MS polar	15730	C08278	HMDB0000893	10457		1.08		0.7379	0.6375		1.1952	1.0479	1.0777		100	100		Lipid	Fatty Acid, Dicarboxylate	100000016	505-48-6	2577.6	173.082
	1679			azelate (C9-DC)	LC/MS neg	18362	C08261	HMDB0000784	2266		1.44		0.2958	0.4459		1.0829	1.3108	1.4411		100	100		Lipid	Fatty Acid, Dicarboxylate	2029	123-99-9	1276	187.098
	1681			sebacate (C10-DC)	LC/MS neg	32398	C08277	HMDB0000792	5192		1.11		0.8419	0.6653		1.1447	1.1827	1.1053		100	100		Lipid	Fatty Acid, Dicarboxylate	100001211	111-20-6	1788	201.113
	1682			decadienedioic acid (C10:2-DC)**	LC/MS polar	63685			17789717		1.04		0.4743	0.529		1.3439	1.1042	1.0406		100	100		Lipid	Fatty Acid, Dicarboxylate	100021711		2329.7	197.082
	1683			undecanedioate (C11-DC)	LC/MS neg	42395		HMDB0000888	15816		1.08		0.7778	0.6468		1.2331	1.1381	1.0793		100	100		Lipid	Fatty Acid, Dicarboxylate	100001617	1852-04-6	2440	215.129
	1686			dodecanedioate (C12-DC)	LC/MS neg	32388	C02678	HMDB0000623	12736		1.25		0.7359	0.6375		1.1261	1.1194	1.2518		100	100		Lipid	Fatty Acid, Dicarboxylate	100001102	693-23-2	2990	229.145
	1687			3-hydroxydodecanedioate*	LC/MS neg	62915		HMDB0000413	16663321		0.96		0.1819	0.3655		1.3444	1.1699	0.9573		100	100		Lipid	Fatty Acid, Dicarboxylate	100001454	34574-69-1	2252	245.139
	1688			dodecenedioate (C12:1-DC)*	LC/MS neg	61864		HMDB0000933	5283028		1.34		0.8097	0.6547		1.1682	1.2583	1.3402		100	100		Lipid	Fatty Acid, Dicarboxylate	100019972		2700	227.129
	1689			dodecadienoate (12:2)*	LC/MS neg	62276			25480		1.04		0.4565	0.5226		1.1588	1.0406	1.0444		100	100		Lipid	Fatty Acid, Dicarboxylate	100020478		5146	195.139
	1690			tridecenedioate (C13:1-DC)*	LC/MS neg	62919					1.1		0.6998	0.6243		1.2495	1.0581	1.1025		100	100		Lipid	Fatty Acid, Dicarboxylate	100002199		3051	241.145
	1691			tetradecanedioate (C14-DC)	LC/MS neg	35669		HMDB0000872	13185		0.93		0.1354	0.3126		1.5684	1.3334	0.9302		100	100		Lipid	Fatty Acid, Dicarboxylate	100001613	821-38-5	3985	257.176
	1693			branched chain 14:0 dicarboxylic acid**	LC/MS neg	63191					1.29		0.9414	0.6911		1.0801	1.1146	1.2879		89	94		Lipid	Fatty Acid, Dicarboxylate	100021374		3849	257.176
	1694			tetradecadienedioate (C14:2-DC)*	LC/MS neg	62918			86018718		0.88		0.0516	0.2216		1.4534	1.1627	0.8811		100	100		Lipid	Fatty Acid, Dicarboxylate	100021100		3148	253.145
	1695			hexadecanedioate (C16-DC)	LC/MS neg	35678	C19615	HMDB0000672	10459		0.91		0.1018	0.2826		1.5594	1.3744	0.9104		100	100		Lipid	Fatty Acid, Dicarboxylate	100001614	505-54-4	4615	285.207
	1696			hexadecenedioate (C16:1-DC)*	LC/MS neg	61862					0.99		0.4402	0.5182		1.1857	1.1448	0.9946		100	100		Lipid	Fatty Acid, Dicarboxylate	100019975		4380	283.191
	1698			octadecanedioate (C18-DC)	LC/MS neg	36754		HMDB0000782	70095		1.09		0.7092	0.6267		1.3468	1.3052	1.0893		100	100		Lipid	Fatty Acid, Dicarboxylate	100001615	871-70-5	5043	313.238
	1699			octadecenedioate (C18:1-DC)	LC/MS neg	61861			9543674		1.2		0.1214	0.3019		1.0907	1.2822	1.2008		100	100		Lipid	Fatty Acid, Dicarboxylate	100019978		4875	311.223
	1700			octadecadienedioate (C18:2-DC)*	LC/MS neg	61860					1.55		0.093	0.2728		1.0373	1.357	1.5521		100	100		Lipid	Fatty Acid, Dicarboxylate	100019982		4676	309.207
	1702			eicosanedioate (C20-DC)	LC/MS neg	39831			75502		1.04		0.7527	0.6415		1.0649	0.9995	1.0369		100	100		Lipid	Fatty Acid, Dicarboxylate	100002951	2424-92-2	5200.9	341.27
	1703			eicosenedioate (C20:1-DC)*	LC/MS neg	62923					0.99		0.3534	0.4719		1.2277	1.0642	0.9914		100	100		Lipid	Fatty Acid, Dicarboxylate	100021105		5095	339.254
	1704			docosadioate (C22-DC)	LC/MS neg	39837	C14240	HMDB0061714	7641		1.21		0.7242	0.6336		1.0725	1.1286	1.2123		100	100		Lipid	Fatty Acid, Dicarboxylate	100002952	505-56-6	5291.8	369.301
	1705			3-carboxy-4-methyl-5-propyl-2-furanpropanoate (CMPF)	LC/MS neg	31787		HMDB0061112	123979		1.05		0.329	0.4574		1.4162	1.3415	1.0532		100	100		Lipid	Fatty Acid, Dicarboxylate	100001178	86879-39-2	2800	239.092
	1706			hydroxy-CMPF*	LC/MS polar	62277					0.84		0.0041	0.1067		1.2507	1.0388	0.8368		100	100		Lipid	Fatty Acid, Dicarboxylate	100019794		2153	255.087
	1707			3-carboxy-4-methyl-5-pentyl-2-furanpropionate (3-CMPFP)**	LC/MS neg	61871		HMDB0061643	194501		1.12		0.1979	0.3754		1.0519	1.1286	1.1174		100	100		Lipid	Fatty Acid, Dicarboxylate	100020004		4000	267.124
	1709			2-hydroxysebacate	LC/MS neg	63357		HMDB0000424	128458		1.4		0.0541	0.2243		0.9966	1.3247	1.4004		100	100		Lipid	Fatty Acid, Dicarboxylate	100020378	103963-71-9	1324	217.108
	1750		Fatty Acid, Amino	2-aminoheptanoate	LC/MS pos early	43761		HMDB0094649	227939		1.1		0.6792	0.6155		1.1129	1.1566	1.0976		100	100		Lipid	Fatty Acid, Amino	100004542	1115-90-8	3160	146.118
	1755			2-aminooctanoate	LC/MS pos late	43343		HMDB0000991	69522		1.13		0.8965	0.6831		0.9936	1.0222	1.1283		100	100		Lipid	Fatty Acid, Amino	100004227	644-90-6	750	160.133
	1756			N-acetyl-2-aminooctanoate*	LC/MS neg	62059		HMDB0059745	95555		1.21		0.2448	0.4134		1.011	1.1361	1.2125		100	100		Lipid	Fatty Acid, Amino	100020204		3943	200.129
	1768		Fatty Acid Metabolism (also BCAA Metabolism)	butyrylcarnitine (C4)	LC/MS pos early	32412	C02862	HMDB0002013	439829		0.99		0.4628	0.5249		1.2018	1.1572	0.9916		100	100		Lipid	Fatty Acid Metabolism (also BCAA Metabolism)	100001054	25576-40-3	2860	232.154
	1769			butyrylglycine	LC/MS neg	31850		HMDB0000808	88412		1.28		0.1258	0.3037		1.1946	1.3307	1.2798		100	100		Lipid	Fatty Acid Metabolism (also BCAA Metabolism)	100001151	20208-73-5	1470	144.067
	1771			propionylcarnitine (C3)	LC/MS pos early	32452	C03017	HMDB0000824	107738		1.11		0.4232	0.5085		1.06	1.1388	1.111		100	100		Lipid	Fatty Acid Metabolism (also BCAA Metabolism)	100001162	17298-37-2	2590	218.139
	1772			propionylglycine	LC/MS polar	31932		HMDB0000783	98681		1.25		0.1416	0.3185		1.0957	1.1712	1.2461		94	100		Lipid	Fatty Acid Metabolism (also BCAA Metabolism)	100001150	21709-90-0	1502.5	130.051
	1774			methylmalonate (MMA)	LC/MS polar	1496	C02170	HMDB0000202	487		0.98		0.467	0.5271		1.357	1.2792	0.9829		100	100		Lipid	Fatty Acid Metabolism (also BCAA Metabolism)	418	516-05-2	3078.4	117.019
	1781		Fatty Acid Metabolism (Acyl Glutamine)	hexanoylglutamine	LC/MS neg	54907					1.02		0.2693	0.4256		1.1788	1.0477	1.0245		100	100		Lipid	Fatty Acid Metabolism (Acyl Glutamine)	100001733		2780	243.135
	1784			4-methylhexanoylglutamine	LC/MS neg	62735					0.99		0.1838	0.3678		1.1846	0.9854	0.9894		100	94		Lipid	Fatty Acid Metabolism (Acyl Glutamine)	100020631		3390	257.151
	1805		Fatty Acid Metabolism (Acyl Glycine)	hexanoylglycine	LC/MS neg	35436		HMDB0000701	99463		1.13		0.7366	0.6375		1.3305	1.3321	1.1319		100	100		Lipid	Fatty Acid Metabolism (Acyl Glycine)	100001527	24003-67-6	2900	172.098
	1811			trans-2-hexenoylglycine	LC/MS neg	61798					0.88		0.0379	0.203		1.5327	1.0675	0.881		94	89		Lipid	Fatty Acid Metabolism (Acyl Glycine)	100019884		2707	170.082
	1814			cis-3,4-methyleneheptanoylglycine	LC/MS neg	64386					1.3		0.3857	0.4906		1.2612	1.3881	1.3015		100	100		Lipid	Fatty Acid Metabolism (Acyl Glycine)	100021992		3731	198.114
	1817			N-octanoylglycine	LC/MS neg	43502		HMDB0000832	84290		1.09		0.7504	0.6404		1.3907	1.3379	1.0948		100	100		Lipid	Fatty Acid Metabolism (Acyl Glycine)	100003940	14246-53-8	4335.4	200.129
	1823			N-palmitoylglycine	LC/MS neg	42092		HMDB0013034	151008		1.65		0.1612	0.3427		1.0783	1.4656	1.6538		100	100		Lipid	Fatty Acid Metabolism (Acyl Glycine)	100003686	2441-41-0	5580	312.254
	1827			N-linoleoylglycine	LC/MS neg	32462			6433346		1.61		0.7389	0.6378		1.0387	1.2735	1.6147		89	89		Lipid	Fatty Acid Metabolism (Acyl Glycine)	1506	2764-03-06	5510	336.254
	1831			3-hydroxybutyroylglycine**	LC/MS pos early	62064					0.78		0.0091	0.1346		1.284	0.9447	0.7792		100	100		Lipid	Fatty Acid Metabolism (Acyl Glycine)	100020211		978	162.076
	1837			picolinoylglycine	LC/MS neg	63057		HMDB0059766	11788622		1.43		0.0796	0.255		0.9249	1.1586	1.4308		100	100		Lipid	Fatty Acid Metabolism (Acyl Glycine)	100021198	5616-29-5	1867	179.046
	1840		Fatty Acid Metabolism (Acyl Carnitine, Short Chain)	acetylcarnitine (C2)	LC/MS pos early	32198	C02571	HMDB0000201	7045767		0.91		0.0343	0.1948		1.1743	1.053	0.9146		100	100		Lipid	Fatty Acid Metabolism (Acyl Carnitine, Short Chain)	100000802	5080-50-2	2282	204.123
	1844		Fatty Acid Metabolism (Acyl Carnitine, Medium Chain)	hexanoylcarnitine (C6)	LC/MS pos early	32328		HMDB0000756	6426853		0.9		0.0624	0.2321		1.3244	1.1204	0.8961		100	100		Lipid	Fatty Acid Metabolism (Acyl Carnitine, Medium Chain)	100000781	6920-35-0	3358	260.186
	1852			octanoylcarnitine (C8)	LC/MS pos late	33936	C02838	HMDB0000791	11953814;123701		1		0.3952	0.4958		1.4277	1.2846	1.0012		100	100		Lipid	Fatty Acid Metabolism (Acyl Carnitine, Medium Chain)	100001247	3671-77-0	950	288.217
	1856			cis-3,4-methyleneheptanoylcarnitine	LC/MS pos late	64389					1.13		0.5121	0.5488		1.1816	1.2471	1.1322		100	100		Lipid	Fatty Acid Metabolism (Acyl Carnitine, Medium Chain)	100021728		845	286.201
	1857			nonanoylcarnitine (C9)	LC/MS pos late	61775		HMDB0013288	91825642		0.94		0.1885	0.3708		1.1971	1.0216	0.9413		94	83		Lipid	Fatty Acid Metabolism (Acyl Carnitine, Medium Chain)	100006620		1010	302.233
	1860			decanoylcarnitine (C10)	LC/MS pos late	33941		HMDB0000651	10245190		1.11		0.7508	0.6404		1.2593	1.2067	1.1134		100	100		Lipid	Fatty Acid Metabolism (Acyl Carnitine, Medium Chain)	100001251	1492-27-9	1130	316.248
	1861			laurylcarnitine (C12)	LC/MS pos late	34534		HMDB000225	168381		1.07		0.691	0.6199		1.2284	1.1521	1.0661		100	100		Lipid	Fatty Acid Metabolism (Acyl Carnitine, Medium Chain)	100001392	25518-54-1	1235	344.28
	1862		Fatty Acid Metabolism (Acyl Carnitine, Long Chain Saturated)	myristoylcarnitine (C14)	LC/MS pos late	33952		HMDB000506	6426854		0.97		0.3621	0.4755		1.0978	1.0615	0.9736		100	100		Lipid	Fatty Acid Metabolism (Acyl Carnitine, Long Chain Saturated)	100001270	18822-89-4	1350	372.311
	1864			palmitoylcarnitine (C16)	LC/MS pos late	44681	C02990	HMDB0000222	461		0.97		0.3535	0.4719		1.0798	1.0312	0.9738		100	100		Lipid	Fatty Acid Metabolism (Acyl Carnitine, Long Chain Saturated)	100000776	6865-14-1	1425	400.342
	1865			margaroylcarnitine (C17)*	LC/MS pos late	57512		HMDB0006210	53477803		0.96		0.2822	0.4352		1.0184	0.9631	0.9647		100	100		Lipid	Fatty Acid Metabolism (Acyl Carnitine, Long Chain Saturated)	100004054	106182-29-0	1424	414.358
	1866			stearoylcarnitine (C18)	LC/MS pos late	34409		HMDB0000848	3006797		1.03		0.9186	0.6851		1.001	1.0162	1.0274		100	100		Lipid	Fatty Acid Metabolism (Acyl Carnitine, Long Chain Saturated)	100001391	18822-91-8	1485	428.373
	1867			arachidoylcarnitine (C20)*	LC/MS pos late	57513		HMDB0006460	53477833		1.15		0.0938	0.2739		1.0802	1.2424	1.1505		100	100		Lipid	Fatty Acid Metabolism (Acyl Carnitine, Long Chain Saturated)	100015833		1512	456.405
	1868			behenoylcarnitine (C22)*	LC/MS pos late	57514		HMDB0062468	71464577		1.34		0.0629	0.2321		0.9455	1.2157	1.338		100	100		Lipid	Fatty Acid Metabolism (Acyl Carnitine, Long Chain Saturated)	100015832		1561	484.436
	1869			lignoceroylcarnitine (C24)*	LC/MS pos late	57515					1.18		0.0583	0.2303		0.9689	1.1129	1.1752		100	100		Lipid	Fatty Acid Metabolism (Acyl Carnitine, Long Chain Saturated)	100015834		1603	512.467
	1870			cerotoylcarnitine (C26)*	LC/MS pos late	57516		HMDB0006347	53477828		1.07		0.5375	0.5612		1.0946	1.1017	1.0745		100	100		Lipid	Fatty Acid Metabolism (Acyl Carnitine, Long Chain Saturated)	100015835		1649	540.499
	1876		Fatty Acid Metabolism (Acyl Carnitine, Monounsaturated)	trans-3,4-methyleneheptanoylcarnitine	LC/MS neg	52929					1.32		0.6446	0.6031		1.0643	1.2289	1.3158		67	78		Lipid	Fatty Acid Metabolism (Acyl Carnitine, Monounsaturated)	100009234		4096	346.187
	1879			3-decenoylcarnitine	LC/MS pos late	63361					1.16		0.6776	0.6155		0.9907	1.0463	1.1584		100	100		Lipid	Fatty Acid Metabolism (Acyl Carnitine, Monounsaturated)	100021136		1045	314.233
	1880			cis-4-decenoylcarnitine (C10:1)	LC/MS pos late	38178		HMDB0013205	57357170		1.07		0.9865	0.6994		1.1888	1.1872	1.0676		100	100		Lipid	Fatty Acid Metabolism (Acyl Carnitine, Monounsaturated)	100002259	98930-66-6	1057	314.233
	1881			undecenoylcarnitine (C11:1)	LC/MS pos late	63613					1.29		0.2191	0.3897		0.9544	1.0467	1.2904		100	100		Lipid	Fatty Acid Metabolism (Acyl Carnitine, Monounsaturated)	100021131		1069	328.248
	1882			5-dodecenoylcarnitine (C12:1)	LC/MS pos late	61769		HMDB13326	91825571		1.07		0.8212	0.6594		1.3903	1.2934	1.0716		100	100		Lipid	Fatty Acid Metabolism (Acyl Carnitine, Monounsaturated)	100016069		1135	342.264
	1884			myristoleoylcarnitine (C14:1)*	LC/MS pos late	48182		HMDB0240588	129691961		1		0.3274	0.4574		1.3894	1.1821	1.0001		100	100		Lipid	Fatty Acid Metabolism (Acyl Carnitine, Monounsaturated)	100006051	889848-55-9	1316	370.295
	1885			palmitoleoylcarnitine (C16:1)*	LC/MS pos late	53223			71464547		0.9		0.0777	0.2527		1.3367	1.1373	0.904		100	100		Lipid	Fatty Acid Metabolism (Acyl Carnitine, Monounsaturated)	100009406		1357	398.326
	1886			oleoylcarnitine (C18:1)	LC/MS pos late	35160		HMDB0005065	6441392		0.89		0.0241	0.1753		1.1814	1.0291	0.8877		100	100		Lipid	Fatty Acid Metabolism (Acyl Carnitine, Monounsaturated)	100001501	38677-66-6	1423	426.358
	1887			eicosenoylcarnitine (C20:1)*	LC/MS pos late	57519					0.91		0.0544	0.2243		1.1524	1.0014	0.9089		100	100		Lipid	Fatty Acid Metabolism (Acyl Carnitine, Monounsaturated)	100015838		1484	454.389
	1889			nervonoylcarnitine (C24:1)*	LC/MS pos late	57531					1.02		0.8742	0.6769		1.0317	1.0044	1.0187		100	100		Lipid	Fatty Acid Metabolism (Acyl Carnitine, Monounsaturated)	100015846		1602	510.452
	1890			ximenoylcarnitine (C26:1)*	LC/MS pos late	57517					1		0.6635	0.6088		1.0942	1.0359	1.0003		100	100		Lipid	Fatty Acid Metabolism (Acyl Carnitine, Monounsaturated)	100015836		1607	538.483
	1891		Fatty Acid Metabolism (Acyl Carnitine, Polyunsaturated)	linoleoylcarnitine (C18:2)*	LC/MS pos late	46223		HMDB0006469	6450015		0.97		0.2998	0.448		1.1375	1.0927	0.9672		100	100		Lipid	Fatty Acid Metabolism (Acyl Carnitine, Polyunsaturated)	100003151	36816-10-1	1430	424.342
	1892			linolenoylcarnitine (C18:3)*	LC/MS pos late	57511					1.02		0.7841	0.6468		1.0925	1.1249	1.021		100	100		Lipid	Fatty Acid Metabolism (Acyl Carnitine, Polyunsaturated)	100015831		1310	422.326
	1893			dihomo-linoleoylcarnitine (C20:2)*	LC/MS pos late	57520					0.93		0.1228	0.302		1.2678	1.1502	0.9271		100	100		Lipid	Fatty Acid Metabolism (Acyl Carnitine, Polyunsaturated)	100015839		1436	452.373
	1894			arachidonoylcarnitine (C20:4)	LC/MS pos late	57518		HMDB0006455	136212424		0.88		0.039	0.2044		1.2832	1.0901	0.8754		100	100		Lipid	Fatty Acid Metabolism (Acyl Carnitine, Polyunsaturated)	100015837		1353	448.342
	1895			dihomo-linolenoylcarnitine (C20:3n3 or 6)*	LC/MS pos late	57521					0.9		0.0574	0.2277		1.2113	1.0538	0.8977		100	100		Lipid	Fatty Acid Metabolism (Acyl Carnitine, Polyunsaturated)	100015840		1392	450.358
	1899			adrenoylcarnitine (C22:4)*	LC/MS pos late	57528					0.99		0.3212	0.4574		1.0996	1.0205	0.9935		89	83		Lipid	Fatty Acid Metabolism (Acyl Carnitine, Polyunsaturated)	100015850		1415	476.373
	1900			docosapentaenoylcarnitine (C22:5n3)*	LC/MS pos late	57529			71464594		1.03		0.3283	0.4574		1.1634	1.2006	1.0322		83	83		Lipid	Fatty Acid Metabolism (Acyl Carnitine, Polyunsaturated)	100015851		1387	474.358
	1902			docosahexaenoylcarnitine (C22:6)*	LC/MS pos late	57523					1.36		0.5765	0.5801		0.9955	1.2735	1.3594		89	78		Lipid	Fatty Acid Metabolism (Acyl Carnitine, Polyunsaturated)	100015845		1349	472.342
	1907		Fatty Acid Metabolism (Acyl Carnitine, Dicarboxylate)	adipoylcarnitine (C6-DC)	LC/MS pos early	52988		HMDB0061677	71296139		0.94		0.1602	0.3418		1.1017	0.9428	0.9403		100	100		Lipid	Fatty Acid Metabolism (Acyl Carnitine, Dicarboxylate)	100006614		2570	290.16
	1914			pimeloylcarnitine/3-methyladipoylcarnitine (C7-DC)	LC/MS pos early	53224					1.41		0.6019	0.5876		0.7659	0.7693	1.4149		72	89		Lipid	Fatty Acid Metabolism (Acyl Carnitine, Dicarboxylate)	100009407		2773	304.175
	1915			suberoylcarnitine (C8-DC)	LC/MS pos early	52990					0.92		0.1019	0.2826		1.0702	0.9186	0.9214		78	83		Lipid	Fatty Acid Metabolism (Acyl Carnitine, Dicarboxylate)	100006627		2964	318.191
	1917			octadecanedioylcarnitine (C18-DC)*	LC/MS pos late	61867					1.02		0.8294	0.662		1.007	0.967	1.0222		100	100		Lipid	Fatty Acid Metabolism (Acyl Carnitine, Dicarboxylate)	100005998	123233-50-1	1227	458.348
	1918			octadecenedioylcarnitine (C18:1-DC)*	LC/MS pos late	61865					1.01		0.6173	0.5952		1.1733	1.0889	1.0054		100	100		Lipid	Fatty Acid Metabolism (Acyl Carnitine, Dicarboxylate)	100005996	251981-06-3	1180	456.332
	1919		Fatty Acid Metabolism (Acyl Carnitine, Hydroxy)	(R)-3-hydroxybutyrylcarnitine	LC/MS pos early	43264		HMDB0013127	53481617		0.8		0.0114	0.1439		1.86	1.0724	0.8017		100	89		Lipid	Fatty Acid Metabolism (Acyl Carnitine, Hydroxy)	100003926		2400	248.149
	1920			(S)-3-hydroxybutyrylcarnitine	LC/MS pos early	52984		HMDB0013127	71464477		0.88		0.0593	0.2321		1.2059	0.9551	0.8753		100	100		Lipid	Fatty Acid Metabolism (Acyl Carnitine, Hydroxy)	100009271		2340	248.149
	1921			3-hydroxyhexanoylcarnitine (1)	LC/MS pos early	62557					0.88		0.0722	0.2476		1.3198	0.9949	0.8801		100	100		Lipid	Fatty Acid Metabolism (Acyl Carnitine, Hydroxy)	100020825		2918	276.181
	1924			3-hydroxyoctanoylcarnitine (1)	LC/MS pos early	64393					1.16		0.6873	0.6188		1.0851	1.1035	1.1603		100	100		Lipid	Fatty Acid Metabolism (Acyl Carnitine, Hydroxy)	100021990		3445	304.212
	1925			3-hydroxyoctanoylcarnitine (2)	LC/MS pos early	64394					1.01		0.5568	0.5744		1.0362	0.9791	1.0054		94	100		Lipid	Fatty Acid Metabolism (Acyl Carnitine, Hydroxy)	100021991		3497	304.212
	1927			3-hydroxydecanoylcarnitine	LC/MS pos late	63358		HMDB0061636	121454166		1.18		0.9149	0.6851		1.1429	1.0891	1.179		100	100		Lipid	Fatty Acid Metabolism (Acyl Carnitine, Hydroxy)	100021141		961	332.243
	1929			3-hydroxyoleoylcarnitine	LC/MS pos late	61840			129637446		0.96		0.2135	0.3864		1.2706	1.0854	0.9554		100	100		Lipid	Fatty Acid Metabolism (Acyl Carnitine, Hydroxy)	100019801		1406	442.353
	1931		Carnitine Metabolism	deoxycarnitine	LC/MS pos early	36747	C01181	HMDB0001161	22620		0.93		0.0643	0.2348		1.036	0.9711	0.9339		100	100		Lipid	Carnitine Metabolism	100001662	6249-56-5	2052	146.118
	1932			carnitine	LC/MS pos early	15500	C00487 C00308	HMDB0000062	288		0.96		0.092	0.2728		1.0383	0.9916	0.9561		100	100		Lipid	Carnitine Metabolism	100000007	461-05-2	1978	162.112
	1938		Ketone Bodies	3-hydroxybutyrate (BHBA)	LC/MS polar	542	C03197 C01089	HMDB0000011 HMDB0000357 HMDB0000442	441;94318;92135		0.91		0.0397	0.2048		2.0996	1.3318	0.9095		100	100		Lipid	Ketone Bodies	254	625-72-9	1480	103.04
	1943		Fatty Acid Metabolism (Acyl Choline)	palmitoylcholine	LC/MS pos late	52944		HMDB0240592	151731		1.11		0.0604	0.2321		1.9497	1.35	1.1122		100	100		Lipid	Fatty Acid Metabolism (Acyl Choline)	100009233		1482	342.337
	1944			oleoylcholine	LC/MS pos late	53260		HMDB0240596	59040790		1.15		0.0606	0.2321		1.6339	1.123	1.1467		100	94		Lipid	Fatty Acid Metabolism (Acyl Choline)	100009331		1449	368.352
	1945			palmitoloelycholine	LC/MS pos late	53257					1.13		0.2778	0.4323		1.0174	0.8104	1.1251		56	50		Lipid	Fatty Acid Metabolism (Acyl Choline)	100009334		1385	340.321
	1947			dihomo-linolenoyl-choline	LC/MS pos late	53262					1.33		0.1427	0.319		1.3317	1.0833	1.3341		100	61		Lipid	Fatty Acid Metabolism (Acyl Choline)	100009335		1424	392.352
	1948			linoleoylcholine*	LC/MS pos late	57463		HMDB0013213	53481656		1.29		0.1045	0.283		1.8082	1.4172	1.2852		100	100		Lipid	Fatty Acid Metabolism (Acyl Choline)	100015760		1388	366.337
	1950			stearoylcholine*	LC/MS pos late	57464			90111		1.28		0.0949	0.2742		1.2942	1.0193	1.2802		100	78		Lipid	Fatty Acid Metabolism (Acyl Choline)	100015759		1520	370.368
	1951			docosahexaenoylcholine	LC/MS pos late	53263					1.09		0.0573	0.2277		1.7635	1.273	1.0923		100	83		Lipid	Fatty Acid Metabolism (Acyl Choline)	100009333		1378	414.337
	1952			arachidonoylcholine	LC/MS pos late	53261		HMDB0240583	122198216		0.96		0.0734	0.2496		1.6278	1.1868	0.9578		100	100		Lipid	Fatty Acid Metabolism (Acyl Choline)	100009332		1390	390.337
	1953			eicosapentaenoylcholine	LC/MS pos late	53258					1.61		0.6456	0.6031		1.1426	1.1992	1.6132		61	44		Lipid	Fatty Acid Metabolism (Acyl Choline)	100009336		1343	388.321
	1958		Fatty Acid, Monohydroxy	alpha-hydroxycaproate	LC/MS neg	37073		HMDB0001624	99824		1.1		0.9657	0.6963		1.1092	1.0378	1.096		83	83		Lipid	Fatty Acid, Monohydroxy	100001723	6064-63-7	1920	131.071
	1960			2-hydroxyoctanoate	LC/MS neg	22036		HMDB0002264	5312860;6995013;94180		1.33		0.1681	0.3499		1.0034	1.0829	1.3299		100	100		Lipid	Fatty Acid, Monohydroxy	100000743	617-73-2	3736.8	159.103
	1962			2-hydroxydecanoate	LC/MS neg	42489		HMDB0094656	21488		1.26		0.3321	0.4574		1.0978	1.1333	1.2589		100	100		Lipid	Fatty Acid, Monohydroxy	100004089	5393-81-7	4840	187.134
	1966			2-hydroxylaurate	LC/MS neg	52916			97783		0.85		6.5766e-05	0.0088		1.1503	0.9744	0.8514		100	100		Lipid	Fatty Acid, Monohydroxy	100008934	2984-55-6	5211	215.165
	1968			2-hydroxypalmitate	LC/MS neg	35675		HMDB0031057	12575964;92836;11065598		1.52		0.0902	0.2718		0.944	1.3343	1.5223		100	100		Lipid	Fatty Acid, Monohydroxy	100001579	764-67-0	5511.2	271.228
	1970			2-hydroxyoleate	LC/MS neg	54920			9796304		1.5		0.4249	0.5098		1.185	1.4727	1.497		100	100		Lipid	Fatty Acid, Monohydroxy	100010866	56472-29-8	5560	297.244
	1971			2-hydroxystearate	LC/MS neg	17945	C03045 C03042	HMDB0062549	69417;439885;439887		1.47		0.0561	0.2276		0.8859	1.2471	1.4687		100	100		Lipid	Fatty Acid, Monohydroxy	1239	629-22-1	5695	299.259
	1973			2-hydroxyarachidate*	LC/MS neg	61700			5225199		1.73		0.0406	0.2055		1.1133	1.62	1.7316		100	100		Lipid	Fatty Acid, Monohydroxy	100019892		5990	327.29
	1974			2-hydroxybehenate	LC/MS neg	57663		HMDB0061660	193484		1.47		0.0183	0.1648		1.0082	1.4708	1.4678		100	100		Lipid	Fatty Acid, Monohydroxy	100015637		6384	355.322
	1976			2-hydroxynervonate*	LC/MS neg	61698			5312783		1.5		0.2097	0.3825		1.0397	1.4576	1.496		100	100		Lipid	Fatty Acid, Monohydroxy	100015638		6345	381.337
	1979			3-hydroxyhexanoate	LC/MS neg	53230		HMDB0061652 HMDB0010718	151492		0.98		0.3478	0.4699		1.1536	1.032	0.9837		100	100		Lipid	Fatty Acid, Monohydroxy	100006367	10191-24-9	1725	131.071
	1980			3-hydroxyoctanoate	LC/MS neg	22001	C20793	HMDB0001954	26613		1.11		0.9549	0.6944		1.0436	1.0895	1.1143		100	100		Lipid	Fatty Acid, Monohydroxy	100000773	88930-08-9	3446	159.103
	1982			3-hydroxydecanoate	LC/MS neg	22053		HMDB0002203	26612		1.03		0.3872	0.4906		1.1261	1.0857	1.026		100	100		Lipid	Fatty Acid, Monohydroxy	100000997	5561-87-5	4634.7	187.134
	1984			3-hydroxysebacate	LC/MS polar	31943		HMDB0000350	3017884		1.02		0.5607	0.5744		1.3425	1.296	1.0235		100	100		Lipid	Fatty Acid, Monohydroxy	100001145	73141-46-5	2411	217.108
	1985			3-hydroxylaurate	LC/MS neg	32457		HMDB0000387	94216		1.1		0.3402	0.4637		1.1729	1.042	1.0953		100	100		Lipid	Fatty Acid, Monohydroxy	100001112	53941-38-1	5175	215.165
	1986			3-hydroxymyristate	LC/MS neg	21158			16064		1.26		0.7047	0.6265		1.0243	1.0408	1.2553		100	100		Lipid	Fatty Acid, Monohydroxy	100000882	3422-31-9	5335	243.197
	1989			3-hydroxystearate	LC/MS neg	52938		HMDB10737	5282907		1.71		0.0269	0.182		0.9905	1.6035	1.7135		100	100		Lipid	Fatty Acid, Monohydroxy	100008933	45261-96-9	5674	299.259
	1990			3-hydroxyoleate*	LC/MS neg	61843					1.59		0.9145	0.6851		1.1874	1.4204	1.5906		100	100		Lipid	Fatty Acid, Monohydroxy	100019966		5508	297.244
	1995			5-hydroxyhexanoate	LC/MS neg	31938		HMDB0000525 HMDB0000409	170748		1.06		0.9649	0.6962		1.2119	1.2052	1.0574		94	94		Lipid	Fatty Acid, Monohydroxy	100001148	44843-89-2	1267	131.071
	2002			9-hydroxystearate	LC/MS neg	47120		HMDB0061661	9570127		2.09		0.4008	0.4962		1.0191	1.3089	2.0891		89	100		Lipid	Fatty Acid, Monohydroxy	100005834	25498-28-6	5384	299.259
	2010			16-hydroxypalmitate	LC/MS neg	39609	C18218	HMDB0006294	10466		1.05		0.552	0.5718		1.1634	1.0848	1.0459		100	100		Lipid	Fatty Acid, Monohydroxy	100002953	506-13-8	5236.2	271.228
	2014			13-HODE + 9-HODE	LC/MS neg	37752	C14767 C14762	HMDB0004667 HMDB0004670	5312830;1424;5282947;5282944;5282945		1.45		0.918	0.6851		1.1932	1.2533	1.4521		100	100		Lipid	Fatty Acid, Monohydroxy	100002196		5275	295.228
	2030		Fatty Acid, Dihydroxy	12,13-DiHOME	LC/MS neg	38395	C14829	HMDB0004705	10236635		1.91		0.4412	0.5187		0.9792	1.2271	1.9117		100	100		Lipid	Fatty Acid, Dihydroxy	62	263399-35-5	5137	313.238
	2031			9,10-DiHOME	LC/MS neg	38399	C14828	HMDB0004704	9966640		1.84		0.5596	0.5744		1.1348	1.3253	1.84		100	100		Lipid	Fatty Acid, Dihydroxy	179	263399-34-4	5180	313.238
	2033			2S,3R-dihydroxybutyrate	LC/MS polar	62950		HMDB0002453	10964471		0.99		0.3811	0.4867		1.1157	1.0179	0.9852		100	100		Lipid	Fatty Acid, Dihydroxy	100002284	5057-93-2	1660	119.035
	2034			2R,3R-dihydroxybutyrate	LC/MS polar	63109		HMDB0000498	13120901		1.08		0.6877	0.6188		1.0614	1.0918	1.0792		100	100		Lipid	Fatty Acid, Dihydroxy	100002367	759-06-8	1543	119.035
	2037			3,4-dihydroxybutyrate	LC/MS polar	62952		HMDB0000337	150929		1.16		0.0117	0.1439		0.9663	1.1176	1.1587		100	100		Lipid	Fatty Acid, Dihydroxy	100001730	51267-44-8	2204	119.035
	2135		Eicosanoid	5-HETE	LC/MS neg	37372	C04805	HMDB0011134	5280733		1.75		0.3515	0.4719		0.9593	1.2905	1.7464		89	100		Lipid	Eicosanoid	100002137	73307-52-5	5382	319.228
	2159		Endocannabinoid	oleoyl ethanolamide	LC/MS neg	38102		HMDB0002088	5283454		1.51		0.3719	0.4796		1.0892	1.3888	1.5129		100	100		Lipid	Endocannabinoid	1137	11-58-0;111-58-0	6450	324.291
	2162			palmitoyl ethanolamide	LC/MS pos late	38165	C16512	HMDB0002100	4671		0.97		0.2594	0.4221		1.2563	1.4428	0.9699		100	100		Lipid	Endocannabinoid	1489	544-31-0	1643	300.29
	2163			stearoyl ethanolamide	LC/MS pos late	38625		HMDB0013078	27902		0.94		0.1821	0.3655		1.1993	1.2121	0.9407		100	100		Lipid	Endocannabinoid	100002254	111-57-9	1787	328.321
	2172			N-oleoyltaurine	LC/MS neg	39732			6437033		1.68		0.3992	0.4959		1.1634	1.5208	1.6793		100	100		Lipid	Endocannabinoid	100003119	52514-04-2	5610	388.253
	2173			N-stearoyltaurine	LC/MS neg	39730			168274		1.93		0.0428	0.2077		0.9052	1.5015	1.9256		100	100		Lipid	Endocannabinoid	100003240	63155-80-6	5782	390.268
	2174			N-palmitoyltaurine	LC/MS neg	39835			14504290		2.47		0.0766	0.2527		0.8884	1.6855	2.4706		94	89		Lipid	Endocannabinoid	100003239	83982-06-3	5560	362.237
	2177			N-linoleoyltaurine*	LC/MS neg	61826			52922081		1.84		0.2622	0.4236		1.0129	1.5975	1.8384		83	89		Lipid	Endocannabinoid	100005814		5505	386.237
	2182			linoleoyl ethanolamide	LC/MS neg	52608		HMDB0012252	5283446		1.43		0.5922	0.5842		1.2269	1.5183	1.4312		100	100		Lipid	Endocannabinoid	100006726	68171-52-8	6150	322.275
	2196			N-oleoylserine	LC/MS neg	57664			44190514		1.46		0.0816	0.2579		0.9472	1.3013	1.4561		100	100		Lipid	Endocannabinoid	100015641		5600	368.281
	2197			N-stearoylserine*	LC/MS neg	61822					1.74		0.0974	0.2777		0.9587	1.4509	1.7422		100	94		Lipid	Endocannabinoid	100019957		5777	370.296
	2201		Inositol Metabolism	myo-inositol	LC/MS polar	1124	C00137	HMDB0000211	892		0.96		0.265	0.4237		1.1107	1.0147	0.9608		100	100		Lipid	Inositol Metabolism	363	87-89-8	3506.3	225.062
	2202			chiro-inositol	LC/MS polar	37112	C19891	HMDB0240209			2.12		0.309	0.4543		0.9101	1.3002	2.1242		50	56		Lipid	Inositol Metabolism	100001859	643-12-9	3191.2	225.062
	2232		Phospholipid Metabolism	choline	LC/MS pos early	15506	C00114	HMDB0000097	305		1.08		0.2065	0.3812		1.0273	1.0938	1.0786		100	100		Lipid	Phospholipid Metabolism	1256	67-48-1	1961	104.107
	2233			choline phosphate	LC/MS pos early	34396	C00588	HMDB0001565	1014		1.35		0.2517	0.4169		1.0091	1.1584	1.3491		100	100		Lipid	Phospholipid Metabolism	267	72556-74-2	700	184.073
	2236			glycerophosphorylcholine (GPC)	LC/MS pos early	15990	C00670	HMDB0000086	71920		0.98		0.2357	0.4042		1.1514	1.0237	0.9817		100	100		Lipid	Phospholipid Metabolism	100000269	28319-77-9	672	258.11
	2238			phosphoethanolamine	LC/MS pos early	1600	C00346	HMDB0000224	1015		1.61		0.3173	0.4574		0.965	1.2446	1.6104		100	100		Lipid	Phospholipid Metabolism	1026	1071-23-4	700	142.026
	2240			glycerophosphoethanolamine	LC/MS pos early	37455	C01233	HMDB0000114	123874		1.24		0.6745	0.6152		0.9887	1.0489	1.2414		100	100		Lipid	Phospholipid Metabolism	100001620	33049-08-0	659	216.063
	2243			trimethylamine N-oxide	LC/MS pos early	40406	C01104	HMDB0000925	1145		1.2		0.9208	0.6851		1.1668	1.2098	1.2049		100	100		Lipid	Phospholipid Metabolism	100003397	1184-78-7	2100	76.0757
	2262		Phosphatidylcholine (PC)	1-myristoyl-2-palmitoyl-GPC (14:0/16:0)	LC/MS pos late	19258		HMDB0007869	129657		1.25		0.3112	0.4545		1.2885	1.4183	1.2548		100	100		Lipid	Phosphatidylcholine (PC)	100000672	69525-80-0	2250	706.538
	2266			1-myristoyl-2-arachidonoyl-GPC (14:0/20:4)*	LC/MS pos late	53195		HMDB0007883	24778634		1.08		0.8195	0.6594		1.2482	1.2385	1.0819		100	100		Lipid	Phosphatidylcholine (PC)	100009139		1950	754.538
	2278			1,2-dipalmitoyl-GPC (16:0/16:0)	LC/MS pos late	19130	D03585	HMDB0000564	452110		1.06		0.1013	0.2826		0.9737	1.0224	1.0628		100	100		Lipid	Phosphatidylcholine (PC)	100000657	63-89-8	2450	734.569
	2279			1-palmitoyl-2-palmitoleoyl-GPC (16:0/16:1)*	LC/MS pos late	52470		HMDB0007969	6443788		1.06		0.8761	0.6769		1.2633	1.3582	1.0625		100	100		Lipid	Phosphatidylcholine (PC)	100008984		2200	732.554
	2281			1-palmitoyl-2-stearoyl-GPC (16:0/18:0)	LC/MS pos late	52616	C03889	HMDB0007970	24778686		1.12		0.0089	0.1346		0.9506	1.0524	1.1182		100	100		Lipid	Phosphatidylcholine (PC)	100008921	59403-51-9	2750	762.601
	2283			1-palmitoyl-2-oleoyl-GPC (16:0/18:1)	LC/MS pos late	52461	C13875	HMDB0007972	6436017		1.02		0.6288	0.5994		1.0473	1.0659	1.0211		100	100		Lipid	Phosphatidylcholine (PC)	1539	26853-31-6;26853-31-6	2450	760.585
	2286			1-palmitoyl-2-linoleoyl-GPC (16:0/18:2)	LC/MS pos late	42446		HMDB0007973	5287971		1.06		0.0663	0.2395		0.9687	1.0143	1.055		100	100		Lipid	Phosphatidylcholine (PC)	1537	40811-94-7	2160	758.569
	2293			1-palmitoyl-2-dihomo-linolenoyl-GPC (16:0/20:3n3 or 6)*	LC/MS pos late	52454					1.01		0.7874	0.6468		1.032	1.035	1.009		100	100		Lipid	Phosphatidylcholine (PC)	100008985		2285	784.585
	2297			1-palmitoyl-2-arachidonoyl-GPC (16:0/20:4n6)	LC/MS pos late	52462	C05208	HMDB0007982	10747814		0.99		0.6765	0.6155		0.9723	0.958	0.9947		100	100		Lipid	Phosphatidylcholine (PC)	100008914	35418-58-7	2200	782.569
	2303			1-palmitoyl-2-docosahexaenoyl-GPC (16:0/22:6)	LC/MS pos late	52610		HMDB0007991	6441886		0.95		0.049	0.2158		1.0458	0.9854	0.9457		100	100		Lipid	Phosphatidylcholine (PC)	100008915	59403-54-2	2055	806.569
	2310			1-palmitoleoyl-2-linolenoyl-GPC (16:1/18:3)*	LC/MS pos late	53180		HMDB0008008	52922452		1.28		0.1028	0.283		1.054	1.2302	1.2776		100	100		Lipid	Phosphatidylcholine (PC)	100009345		1900	754.538
	2322			1-stearoyl-2-oleoyl-GPC (18:0/18:1)	LC/MS pos late	52438		HMDB0008038	24778825		1.12		0.0197	0.1648		0.9708	1.0734	1.1153		100	100		Lipid	Phosphatidylcholine (PC)	100008904	56421-10-4	2644	788.616
	2325			1-stearoyl-2-linoleoyl-GPC (18:0/18:2)*	LC/MS pos late	52452		HMDB0008039	6441487		1.09		0.0014	0.0811		0.9443	1.0287	1.0948		100	100		Lipid	Phosphatidylcholine (PC)	100008980		2450	786.601
	2333			1-stearoyl-2-arachidonoyl-GPC (18:0/20:4)	LC/MS pos late	42450		HMDB0008048	16219824		1		0.9729	0.6967		0.9766	0.969	1.0041		100	100		Lipid	Phosphatidylcholine (PC)	100001869	35418-59-8	2400	810.601
	2339			1-stearoyl-2-docosahexaenoyl-GPC (18:0/22:6)	LC/MS pos late	52611		HMDB0008057	24778876		0.97		0.2663	0.4238		0.9984	0.9612	0.967		100	100		Lipid	Phosphatidylcholine (PC)	100008916	59403-52-0	2300	834.601
	2348			1-oleoyl-2-linoleoyl-GPC (18:1/18:2)*	LC/MS pos late	52453		HMDB0008105	24778939		1.36		0.0498	0.2165		0.9812	1.2122	1.3561		100	100		Lipid	Phosphatidylcholine (PC)	100008981		2250	784.585
	2358			1-oleoyl-2-docosahexaenoyl-GPC (18:1/22:6)*	LC/MS pos late	52697		HMDB0008123	24778955		0.97		0.2775	0.4323		1.0564	1.0109	0.9661		100	100		Lipid	Phosphatidylcholine (PC)	100009130		2100	832.585
	2359			1,2-dilinoleoyl-GPC (18:2/18:2)	LC/MS pos late	52603		HMDB0008138	5288075		1.25		0.0294	0.1861		0.9733	1.1635	1.2489		100	100		Lipid	Phosphatidylcholine (PC)	100008903	998-06-1	2100	782.569
	2360			1-linoleoyl-2-linolenoyl-GPC (18:2/18:3)*	LC/MS pos late	53176		HMDB0008141	52922731		1.75		0.0078	0.133		0.8449	1.2476	1.753		100	100		Lipid	Phosphatidylcholine (PC)	100009343		1939	780.554
	2365			1-linoleoyl-2-arachidonoyl-GPC (18:2/20:4n6)*	LC/MS pos late	52710	C05208	HMDB0008147	24778979		1.08		0.0608	0.2321		0.972	1.0428	1.0837		100	100		Lipid	Phosphatidylcholine (PC)	100009131		2000	806.569
	2404		Phosphatidylethanolamine (PE)	1,2-dipalmitoyl-GPE (16:0/16:0)*	LC/MS pos late	57341		HMDB0008923	445468		1.54		0.227	0.3985		0.9193	1.057	1.5406		78	78		Lipid	Phosphatidylethanolamine (PE)	100009204		2498	692.522
	2407			1-palmitoyl-2-stearoyl-GPE (16:0/18:0)*	LC/MS pos late	57388		HMDB08925	5326793		2.11		0.1176	0.2976		0.7199	0.9607	2.106		61	78		Lipid	Phosphatidylethanolamine (PE)	100009205		2850	720.554
	2408			1-palmitoyl-2-oleoyl-GPE (16:0/18:1)	LC/MS pos late	19263		HMDB0005320	5283496		1.21		0.2129	0.3861		0.9801	1.07	1.2105		100	100		Lipid	Phosphatidylethanolamine (PE)	1526	26662-94-2	2600	718.538
	2410			1-palmitoyl-2-linoleoyl-GPE (16:0/18:2)	LC/MS pos late	42449		HMDB0005322	9546747		1.33		0.0689	0.2433		1.0628	1.2596	1.3283		100	100		Lipid	Phosphatidylethanolamine (PE)	100001870		2350	716.522
	2416			1-palmitoyl-2-arachidonoyl-GPE (16:0/20:4)*	LC/MS pos late	52464	C05210	HMDB0005323	9546800		1.16		0.2468	0.4134		1.021	1.1174	1.162		100	100		Lipid	Phosphatidylethanolamine (PE)	100008990		2250	740.522
	2418			1-palmitoyl-2-docosahexaenoyl-GPE (16:0/22:6)*	LC/MS pos late	52465		HMDB0008946	9546799		1.06		0.8436	0.6653		1.0186	1.0243	1.0622		100	100		Lipid	Phosphatidylethanolamine (PE)	100008991		2160	764.522
	2425			1-stearoyl-2-oleoyl-GPE (18:0/18:1)	LC/MS pos late	42448		HMDB0008993	9546742		1.49		0.0538	0.2243		0.8829	1.0827	1.4904		100	100		Lipid	Phosphatidylethanolamine (PE)	100001856		2950	746.569
	2429			1-stearoyl-2-linoleoyl-GPE (18:0/18:2)*	LC/MS pos late	52446		HMDB0008994	9546749		1.48		0.0354	0.1977		0.9142	1.1433	1.4754		100	100		Lipid	Phosphatidylethanolamine (PE)	100008976		2575	744.554
	2438			1-stearoyl-2-arachidonoyl-GPE (18:0/20:4)	LC/MS pos late	52447	C05210	HMDB0009003	5289133		1.15		0.2157	0.3874		0.9824	1.0567	1.1468		100	100		Lipid	Phosphatidylethanolamine (PE)	100008977		2475	768.554
	2442			1-stearoyl-2-docosahexaenoyl-GPE (18:0/22:6)*	LC/MS pos late	52466		HMDB0009012	9546798		1.08		0.6573	0.6049		1.0173	1.0295	1.0811		100	100		Lipid	Phosphatidylethanolamine (PE)	100008992		2375	792.554
	2444			1-oleoyl-2-linoleoyl-GPE (18:1/18:2)*	LC/MS pos late	52687		HMDB0005349	9546753		1.85		0.0194	0.1648		0.8924	1.145	1.8464		94	100		Lipid	Phosphatidylethanolamine (PE)	100009078		2270	742.538
	2447			1-oleoyl-2-arachidonoyl-GPE (18:1/20:4)*	LC/MS pos late	55041		HMDB0009069	348281223		1.15		0.5136	0.5488		1.1315	1.2414	1.146		94	100		Lipid	Phosphatidylethanolamine (PE)	100009219		2200	766.538
	2451			1-oleoyl-2-docosahexaenoyl-GPE (18:1/22:6)*	LC/MS pos late	53209		HMDB0009078	52922113		1.25		0.3489	0.4707		0.973	1.0651	1.2471		78	100		Lipid	Phosphatidylethanolamine (PE)	100009220		2119	790.538
	2452			1,2-dilinoleoyl-GPE (18:2/18:2)*	LC/MS pos late	53174		HMDB0009093	9546812		3.15		0.0596	0.2321		1.2357	1.6232	3.1531		72	94		Lipid	Phosphatidylethanolamine (PE)	100009217		2150	740.522
	2505		Phosphatidylserine (PS)	1-stearoyl-2-oleoyl-GPS (18:0/18:1)	LC/MS pos late	19265		HMDB0010163	9547087		4.5		0.6667	0.6106		1.652	2.8088	4.5043		100	100		Lipid	Phosphatidylserine (PS)	100000639		3000	790.559
	2508			1-stearoyl-2-arachidonoyl-GPS (18:0/20:4)	LC/MS pos late	52235		HMDB0012383	24779545		4.24		0.8319	0.6629		0.3886	0.7827	4.241		22	28		Lipid	Phosphatidylserine (PS)	100001872		2565	812.544
	2534		Phosphatidylinositol (PI)	1-palmitoyl-2-oleoyl-GPI (16:0/18:1)*	LC/MS polar	52669		HMDB0009783	71296232		1.24		0.0335	0.1948		1.0041	1.2024	1.235		100	100		Lipid	Phosphatidylinositol (PI)	100009066		893	835.534
	2536			1-palmitoyl-2-linoleoyl-GPI (16:0/18:2)	LC/MS polar	52450		HMDB0009784	46891795		1.26		0.0091	0.1346		0.9749	1.201	1.2551		100	100		Lipid	Phosphatidylinositol (PI)	1528		910	833.518
	2539			1-palmitoyl-2-arachidonoyl-GPI (16:0/20:4)*	LC/MS pos late	52467		HMDB0009789			1.29		0.1528	0.3304		0.9096	1.0625	1.2924		100	100		Lipid	Phosphatidylinositol (PI)	100008993		2567	876.56
	2542			1-stearoyl-2-oleoyl-GPI (18:0/18:1)*	LC/MS pos late	52726					1.2		0.3613	0.4755		1.043	1.1175	1.2035		100	100		Lipid	Phosphatidylinositol (PI)	100009181		3711	882.607
	2543			1-stearoyl-2-linoleoyl-GPI (18:0/18:2)	LC/MS pos late	52468		HMDB0009809			1.22		0.0114	0.1439		0.9087	1.0916	1.2183		100	100		Lipid	Phosphatidylinositol (PI)	100008994		3185	880.591
	2556			1-stearoyl-2-arachidonoyl-GPI (18:0/20:4)	LC/MS pos late	52449		HMDB0009815			1.05		0.4218	0.5085		0.9942	1.0301	1.0514		100	100		Lipid	Phosphatidylinositol (PI)	100000616	383907-33-3	3000	904.591
	2600		Lysophospholipid	1-palmitoyl-GPC (16:0)	LC/MS pos late	33955	C04102	HMDB0010382	86554		1		0.7868	0.6468		1.0276	1.0208	0.9991		100	100		Lipid	Lysophospholipid	100001263	17364-16-8	1525	496.34
	2601			2-palmitoyl-GPC (16:0)*	LC/MS neg	35253		HMDB0061702	15061532		1.64		0.0726	0.2479		0.9399	1.423	1.6377		100	100		Lipid	Lysophospholipid	100001562		6215	570.341
	2602			1-palmitoleoyl-GPC (16:1)*	LC/MS pos late	33230		HMDB0010383	24779461		0.98		0.4549	0.5226		1.1316	1.0974	0.9822		100	100		Lipid	Lysophospholipid	100001511		1450	494.324
	2603			2-palmitoleoyl-GPC (16:1)*	LC/MS neg	47118		HMDB10383	122164832		1.51		0.219	0.3897		1.1658	1.4575	1.5069		100	100		Lipid	Lysophospholipid	100001561		5720	568.326
	2611			1-stearoyl-GPC (18:0)	LC/MS pos late	33961		HMDB0010384	497300		1.04		0.6253	0.5994		1.0065	1.0361	1.0352		100	100		Lipid	Lysophospholipid	100001271	19420-57-6	1606	524.371
	2613			1-oleoyl-GPC (18:1)	LC/MS pos late	48258	C03916	HMDB0002815	16081932		0.99		0.5966	0.5861		1.073	1.0447	0.9931		100	100		Lipid	Lysophospholipid	100001272	19420-56-5	1540	522.355
	2616			1-linoleoyl-GPC (18:2)	LC/MS pos late	34419	C04100	HMDB0010386	11988421		1.07		0.5674	0.5776		1.0811	1.1124	1.0661		100	100		Lipid	Lysophospholipid	100001395		1465	520.34
	2618			1-linolenoyl-GPC (18:3)*	LC/MS pos late	45951	C04100	HMDB0010388			1.18		0.4561	0.5226		1.0454	1.0781	1.1764		100	100		Lipid	Lysophospholipid	100005350		1410	518.324
	2635			1-arachidonoyl-GPC (20:4n6)*	LC/MS neg	34061	C05208	HMDB0010395	24779476		1.34		0.5896	0.584		1.1291	1.329	1.3375		100	100		Lipid	Lysophospholipid	100001551		6074	618.341
	2649			1-lignoceroyl-GPC (24:0)	LC/MS pos late	49617		HMDB0010405	24779481		1.29		0.0017	0.082		0.9133	1.1217	1.2895		100	100		Lipid	Lysophospholipid	100002873	325171-59-3	1907	608.465
	2657			1-cerotoyl-GPC (26:0)*	LC/MS pos late	61505		HMDB29205			1.15		0.7649	0.6448		0.7583	0.7655	1.1541		44	56		Lipid	Lysophospholipid	100015772		1990	636.496
	2662			1-palmitoyl-GPE (16:0)	LC/MS pos late	35631		HMDB0011503	9547069		1		0.7743	0.6463		0.9921	0.9701	1.0047		100	100		Lipid	Lysophospholipid	100001567	53862-35-4	1544	454.293
	2669			1-stearoyl-GPE (18:0)	LC/MS pos late	42398		HMDB0011130	9547068		1.04		0.6422	0.6031		0.9815	1.0031	1.0394		100	100		Lipid	Lysophospholipid	100001461	69747-55-3	1626	482.324
	2670			2-stearoyl-GPE (18:0)*	LC/MS neg	41220		HMDB0011129	90658453;53480667		1.36		0.6794	0.6155		1.3443	1.3556	1.3629		100	100		Lipid	Lysophospholipid	100003901		6350	480.31
	2671			1-oleoyl-GPE (18:1)	LC/MS pos late	35628		HMDB0011506	9547071		1.16		0.3588	0.4749		0.9715	1.0252	1.1642		100	100		Lipid	Lysophospholipid	100001569	89576-29-4	1554	480.308
	2673			1-linoleoyl-GPE (18:2)*	LC/MS neg	32635		HMDB0011507	52925130		1.65		0.0222	0.1749		0.9471	1.3786	1.6467		100	100		Lipid	Lysophospholipid	100001570		5900	476.278
	2686			1-arachidonoyl-GPE (20:4n6)*	LC/MS pos late	35186		HMDB0011517	42607465		0.99		0.5853	0.5831		0.9949	0.9746	0.9901		100	100		Lipid	Lysophospholipid	100001571		1470	502.293
	2708			1-palmitoyl-GPG (16:0)*	LC/MS neg	45970			3300276		1.72		0.0176	0.1648		0.9485	1.5087	1.7244		100	100		Lipid	Lysophospholipid	100005717		5570	483.273
	2711			1-stearoyl-GPG (18:0)	LC/MS neg	34437					1.63		0.047	0.2118		0.9431	1.4831	1.6314		100	100		Lipid	Lysophospholipid	100001462		5816	511.304
	2713			1-oleoyl-GPG (18:1)*	LC/MS neg	45968					1.93		0.0157	0.1563		0.8792	1.4505	1.934		100	100		Lipid	Lysophospholipid	100005716		5610	509.288
	2715			1-linoleoyl-GPG (18:2)*	LC/MS neg	54885					1.71		0.1845	0.3684		0.9862	1.4066	1.7074		100	100		Lipid	Lysophospholipid	100009227		5516	507.273
	2717			1-palmitoyl-GPI (16:0)	LC/MS neg	35305		HMDB0061695	71296207		1.17		0.714	0.6291		1.2622	1.1999	1.1686		100	100		Lipid	Lysophospholipid	100001655		5564	571.289
	2721			1-stearoyl-GPI (18:0)	LC/MS neg	19324		HMDB0240261	71581135;42607495		1.15		0.6284	0.5994		1.1387	1.1158	1.1533		100	100		Lipid	Lysophospholipid	100000656	796963-93-4	5794	599.32
	2723			1-oleoyl-GPI (18:1)	LC/MS neg	36602		HMDB0061693	86289645		1.38		0.2482	0.4134		1.0915	1.2826	1.3813		100	100		Lipid	Lysophospholipid	100001777		5599	597.305
	2725			1-linoleoyl-GPI (18:2)*	LC/MS neg	36594			11124828		1.35		0.2589	0.4221		1.0659	1.3082	1.3527		100	100		Lipid	Lysophospholipid	100001778		5494	595.289
	2731			1-arachidonoyl-GPI (20:4)*	LC/MS neg	34214		HMDB0061690	121596217		1.16		0.8456	0.6653		1.0994	1.1748	1.1574		100	100		Lipid	Lysophospholipid	100001654		5482	619.289
	2800		Plasmalogen	1-(1-enyl-palmitoyl)-2-oleoyl-GPE (P-16:0/18:1)*	LC/MS pos late	52477		HMDB0011342	52925128		1.03		0.8771	0.6769		1.0082	1.0096	1.0328		100	100		Lipid	Plasmalogen	100009005		2750	702.543
	2801			1-(1-enyl-palmitoyl)-2-linoleoyl-GPE (P-16:0/18:2)*	LC/MS pos late	52677		HMDB0011343	52925127		1.16		0.2047	0.3812		0.9813	1.0787	1.1637		100	100		Lipid	Plasmalogen	100009069		2400	700.528
	2802			1-(1-enyl-palmitoyl)-2-palmitoyl-GPC (P-16:0/16:0)*	LC/MS pos late	52716		HMDB0011206	11146967		1.04		0.4857	0.5336		0.9691	0.9872	1.0382		100	100		Lipid	Plasmalogen	100009162		2550	718.575
	2803			1-(1-enyl-palmitoyl)-2-palmitoleoyl-GPC (P-16:0/16:1)*	LC/MS pos late	52713		HMDB0011207	52923882		1.02		0.9833	0.6983		1.0711	1.0772	1.0202		100	100		Lipid	Plasmalogen	100009160		2218	716.559
	2804			1-(1-enyl-palmitoyl)-2-arachidonoyl-GPE (P-16:0/20:4)*	LC/MS pos late	52673		HMDB0011352	52925126		1.05		0.9798	0.6983		1.1261	1.1072	1.0486		100	100		Lipid	Plasmalogen	100009002		2300	724.528
	2806			1-(1-enyl-palmitoyl)-2-oleoyl-GPC (P-16:0/18:1)*	LC/MS pos late	52478		HMDB0007996	34779384		1.04		0.3321	0.4574		1.0378	1.0688	1.045		100	100		Lipid	Plasmalogen	100009007		2550	744.59
	2809			1-(1-enyl-stearoyl)-2-oleoyl-GPE (P-18:0/18:1)	LC/MS pos late	52614		HMDB0011375	42607457		1.14		0.1587	0.3401		0.9325	1.0103	1.1437		100	100		Lipid	Plasmalogen	100008919	144371-68-6	3100	730.575
	2810			1-(1-enyl-stearoyl)-2-linoleoyl-GPE (P-18:0/18:2)*	LC/MS pos late	52748		HMDB0011376			1.17		0.0996	0.2805		0.9368	1.0491	1.1657		100	100		Lipid	Plasmalogen	100009225		2750	728.559
	2813			1-(1-enyl-palmitoyl)-2-arachidonoyl-GPC (P-16:0/20:4)*	LC/MS pos late	52689		HMDB0011220			1		0.721	0.6329		1.0174	0.9773	1.0016		100	100		Lipid	Plasmalogen	100009014		2200	766.575
	2814			1-(1-enyl-palmitoyl)-2-linoleoyl-GPC (P-16:0/18:2)*	LC/MS pos late	52682		HMDB0011211	24779386		1.09		0.4224	0.5085		1.0175	1.0482	1.0909		100	100		Lipid	Plasmalogen	100009009		2300	742.575
	2818			1-(1-enyl-stearoyl)-2-arachidonoyl-GPE (P-18:0/20:4)*	LC/MS pos late	52475		HMDB0005779	9547058		1.09		0.713	0.6288		1.054	1.0498	1.0863		100	100		Lipid	Plasmalogen	100008999		2550	752.559
	2833		Lysoplasmalogen	1-(1-enyl-palmitoyl)-GPC (P-16:0)*	LC/MS pos late	52474		HMDB0010407	10917802		1		0.6134	0.5951		1.0835	1.0484	0.9998		100	100		Lipid	Lysoplasmalogen	100002875		1547	480.345
	2834			1-(1-enyl-palmitoyl)-GPE (P-16:0)*	LC/MS pos late	39270		HMDB0011152			1.06		0.634	0.6019		1.1404	1.112	1.0573		100	100		Lipid	Lysoplasmalogen	100003000		1558	438.298
	2836			1-(1-enyl-oleoyl)-GPE (P-18:1)*	LC/MS pos late	44621					1.07		0.4163	0.5059		1.1689	1.0819	1.0679		100	100		Lipid	Lysoplasmalogen	100005372		1566	464.314
	2838			1-(1-enyl-stearoyl)-GPE (P-18:0)*	LC/MS pos late	39271					1.07		0.7763	0.6468		1.1622	1.1459	1.0742		100	100		Lipid	Lysoplasmalogen	100003001		1649	466.329
	2841		Glycerolipid Metabolism	glycerol	LC/MS neg	15122	C00116	HMDB0000131	753		1.05		0.4119	0.5033		1.452	1.2298	1.0478		100	100		Lipid	Glycerolipid Metabolism	1254	56-81-5	758	91.0401
	2842			glycerol 3-phosphate	LC/MS pos early	43847	C0093	HMDB0000126	754		1.16		0.4429	0.5189		0.9607	1.0784	1.1637		100	100		Lipid	Glycerolipid Metabolism	100000258	29849-82-9	580	173.021
	2848		Monoacylglycerol	1-myristoylglycerol (14:0)	LC/MS neg	35625	C01885	HMDB0011561	10957631		1.47		0.1475	0.3259		0.9731	1.3908	1.4747		89	83		Lipid	Monoacylglycerol	100001618	75685-84-6	6353.3	227.202
	2851			1-palmitoylglycerol (16:0)	LC/MS neg	21127		HMDB0011564	14900		2.34		0.56	0.5744		1.2726	1.6928	2.3443		100	100		Lipid	Monoacylglycerol	100000827	542-44-9	6550	255.233
	2852			1-palmitoleoylglycerol (16:1)*	LC/MS neg	52431					1.99		0.6481	0.6031		1.2301	1.2338	1.988		83	78		Lipid	Monoacylglycerol	100008952		6094	253.217
	2855			1-oleoylglycerol (18:1)	LC/MS neg	21184		HMDB0011567	5283468		1.63		0.9512	0.694		1.1682	1.55	1.6349		100	100		Lipid	Monoacylglycerol	100000924	111-03-5	6650	281.249
	2856			1-linoleoylglycerol (18:2)	LC/MS neg	27447		HMDB0011568	5283469		1.66		0.6641	0.6088		1.0121	1.2346	1.6567		100	100		Lipid	Monoacylglycerol	100001040	2277-28-3	6477	279.233
	2857			1-linolenoylglycerol (18:3)	LC/MS neg	34393		HMDB0011569	53480978		2.22		0.5846	0.5831		0.8874	1.3774	2.2179		94	72		Lipid	Monoacylglycerol	100001435	124151-74-2	6214	277.217
	2861			1-dihomo-linolenylglycerol (20:3)	LC/MS neg	48341					1.84		0.6889	0.6188		1.1273	1.3627	1.8386		94	100		Lipid	Monoacylglycerol	100006121		6400	305.249
	2862			1-arachidonylglycerol (20:4)	LC/MS neg	34397	C13857	HMDB11578	16019980;5282281		1.35		0.5989	0.5871		1.6208	1.124	1.3502		100	94		Lipid	Monoacylglycerol	100001433	35474-99-8	6250	303.233
	2871			2-oleoylglycerol (18:1)	LC/MS neg	21232		HMDB0011537	5319879		3.88		0.5798	0.5818		0.7976	1.1679	3.881		56	72		Lipid	Monoacylglycerol	100000943	3443-84-3	6500	281.249
	2872			2-linoleoylglycerol (18:2)	LC/MS neg	32506		HMDB0011538	5365676		1.3		0.7914	0.6468		1.4357	1.3791	1.3032		100	100		Lipid	Monoacylglycerol	100000987	3443-82-1	6250	279.233
	2873			2-arachidonoylglycerol (20:4)	LC/MS neg	19266	C13856	HMDB0004666	5282280		1.48		0.6549	0.6049		0.9719	0.9952	1.4779		78	61		Lipid	Monoacylglycerol	100000584	53847-30-6	6170	303.233
	2889		Diacylglycerol	diacylglycerol (16:1/18:2 [2], 16:0/18:3 [1])*	LC/MS pos late	54966					2.15		0.0123	0.1439		0.6559	0.8844	2.1457		44	67		Lipid	Diacylglycerol	100010940		2733	608.525
	2911			palmitoleoyl-linoleoyl-glycerol (16:1/18:2) [1]*	LC/MS pos late	54967		HMDB0007132	9543699		1.61		0.4287	0.5117		1.0258	1.1937	1.6059		94	89		Lipid	Diacylglycerol	100010930		2664	608.525
	2914			palmitoyl-arachidonoyl-glycerol (16:0/20:4) [2]*	LC/MS pos late	54958		HMDB0007112	9543736		1.68		0.1711	0.3537		0.8171	0.9955	1.6762		56	78		Lipid	Diacylglycerol	100010925		3015	634.541
	2915			palmitoleoyl-arachidonoyl-glycerol (16:1/20:4) [2]*	LC/MS pos late	57406					1.15		0.8106	0.6549		1.0624	1.0249	1.1515		67	67		Lipid	Diacylglycerol	100015681		2528	632.525
	2926			oleoyl-linoleoyl-glycerol (18:1/18:2) [1]	LC/MS pos late	46798		HMDB0007219	14275396		1.15		0.9286	0.6881		1.1891	1.164	1.1517		100	100		Lipid	Diacylglycerol	100002989	106292-55-1	3115	636.556
	2927			oleoyl-linoleoyl-glycerol (18:1/18:2) [2]	LC/MS pos late	46799		HMDB0007219	71433693		1.14		0.6174	0.5952		0.9988	1.0607	1.1441		100	100		Lipid	Diacylglycerol	100002990	104346-53-4	3223	636.556
	2931			linoleoyl-linoleoyl-glycerol (18:2/18:2) [1]*	LC/MS pos late	54968		HMDB0007248	9543729		1.31		0.5256	0.5541		1.0452	1.1713	1.3128		100	100		Lipid	Diacylglycerol	100010941		2720	634.541
	2932			linoleoyl-linoleoyl-glycerol (18:2/18:2) [2]*	LC/MS pos late	54969		HMDB0007248	9543729		1.51		0.7345	0.6369		0.9282	0.9672	1.5129		78	83		Lipid	Diacylglycerol	100010942		2790	634.541
	2934			linoleoyl-linolenoyl-glycerol (18:2/18:3) [2]*	LC/MS pos late	54964		HMDB0007250	9543737		1.9		0.0884	0.271		0.919	1.3054	1.8981		89	94		Lipid	Diacylglycerol	100010927		2478	632.525
	2939			oleoyl-arachidonoyl-glycerol (18:1/20:4) [1]*	LC/MS pos late	54960		HMDB0007228	9543786		2.39		0.2309	0.4015		0.825	0.993	2.3861		83	89		Lipid	Diacylglycerol	100010936		2907	660.556
	2940			oleoyl-arachidonoyl-glycerol (18:1/20:4) [2]*	LC/MS pos late	54961		HMDB0007228	9543786		2.28		0.1331	0.3103		0.9116	1.1359	2.2797		83	100		Lipid	Diacylglycerol	100010937		2990	660.556
	2941			linoleoyl-arachidonoyl-glycerol (18:2/20:4) [1]*	LC/MS pos late	54955		HMDB0007257	9543796		1.55		0.8376	0.6644		0.9243	0.8337	1.552		78	67		Lipid	Diacylglycerol	100010922		2590	658.541
	2942			linoleoyl-arachidonoyl-glycerol (18:2/20:4) [2]*	LC/MS pos late	54956		HMDB0007257	9543796		1.58		0.2792	0.4324		1.1196	1.3974	1.5758		100	100		Lipid	Diacylglycerol	100010923		2650	658.541
	2945			linoleoyl-docosahexaenoyl-glycerol (18:2/22:6) [1]*	LC/MS pos late	54949		HMDB0007266	9543899		1.68		0.4577	0.5226		0.9626	1.27	1.6828		44	61		Lipid	Diacylglycerol	100010928		2450	682.541
	2946			linoleoyl-docosahexaenoyl-glycerol (18:2/22:6) [2]*	LC/MS pos late	54950		HMDB0007266	9543899		1.28		0.9825	0.6983		1.2869	1.5035	1.2838		89	100		Lipid	Diacylglycerol	100010929		2500	682.541
	2999		Sphingolipid Synthesis	3-ketosphinganine	LC/MS pos late	34381	C02934	HMDB01480	631		0.84		0.032	0.1946		1.0224	0.8105	0.8407		78	44		Lipid	Sphingolipid Synthesis	100001436	18944-28-0	1400	300.29
	3000			sphinganine	LC/MS pos late	17769	C00836	HMDB0000269	3126		1.25		0.5104	0.5482		1.1259	1.2651	1.2482		100	100		Lipid	Sphingolipid Synthesis	313	3102-56-5	1413	302.305
	3001			sphinganine-1-phosphate	LC/MS pos late	52605		HMDB0001383	520		1.14		0.855	0.6703		1.0855	1.1449	1.1435		100	100		Lipid	Sphingolipid Synthesis	100001876	19794-97-9	1431	382.272
	3009		Dihydroceramides	N-palmitoyl-sphinganine (d18:0/16:0)	LC/MS pos late	52604		HMDB11760	5283572		1.49		0.0831	0.2607		0.9171	1.1867	1.4943		100	100		Lipid	Dihydroceramides	100009028	5966-29-0	3090	540.535
	3012			N-stearoyl-sphinganine (d18:0/18:0)*	LC/MS pos late	1759			5283573		1.13		0.6408	0.6031		0.9092	0.9168	1.1303		94	94		Lipid	Dihydroceramides	922	2304-80-5	3526	568.566
	3021		Ceramides	N-palmitoyl-sphingosine (d18:1/16:0)	LC/MS pos late	44877		HMDB0004949	5283564		1.13		0.0452	0.2112		0.9552	1.0651	1.1259		100	100		Lipid	Ceramides	1518	24696-26-2	2893	538.519
	3025			N-stearoyl-sphingosine (d18:1/18:0)*	LC/MS pos late	54979		HMDB0004950	5283565		1		0.6479	0.6031		1.0067	0.973	1.0046		100	100		Lipid	Ceramides	1547	104404-17-3	3392	566.551
	3031			N-palmitoyl-sphingadienine (d18:2/16:0)*	LC/MS pos late	57416					1.11		0.9691	0.6967		0.9314	0.95	1.1127		100	100		Lipid	Ceramides	100015609		2490	536.504
	3032			N-stearoyl-sphingadienine (d18:2/18:0)*	LC/MS pos late	57417			132282053		0.96		0.2529	0.4172		1.0753	0.9699	0.9586		100	100		Lipid	Ceramides	100015632		2846	564.535
	3043			N-palmitoyl-heptadecasphingosine (d17:1/16:0)*	LC/MS pos late	57430					1.1		0.2676	0.4244		0.9426	1.0131	1.1046		100	100		Lipid	Ceramides	100015731		2645	524.504
	3047			ceramide (d18:1/14:0, d16:1/16:0)*	LC/MS pos late	57432					1.3		0.797	0.6478		0.957	0.9639	1.304		67	83		Lipid	Ceramides	100015735		2477	510.488
	3048			ceramide (d18:1/17:0, d17:1/18:0)*	LC/MS pos late	57434					1.3		0.7127	0.6288		1.0984	1.0257	1.2966		83	89		Lipid	Ceramides	100015737		3055	552.535
	3052			ceramide (d18:2/24:1, d18:1/24:2)*	LC/MS pos late	57443					1.35		0.1679	0.3499		0.9569	1.0715	1.3545		100	100		Lipid	Ceramides	100015744		3858	646.613
	3057		Hexosylceramides (HCER)	glycosyl-N-palmitoyl-sphingosine (d18:1/16:0)	LC/MS pos late	53013					1.09		0.0201	0.1648		0.9662	1.0368	1.0912		100	100		Lipid	Hexosylceramides (HCER)	100009272		2623	700.572
	3058			glycosyl-N-stearoyl-sphingosine (d18:1/18:0)	LC/MS pos late	52234					1.08		0.8956	0.6831		1.0475	1.0548	1.0799		100	100		Lipid	Hexosylceramides (HCER)	100001882		3053	728.604
	3064			glycosyl-N-(2-hydroxynervonoyl)-sphingosine (d18:1/24:1(2OH))*	LC/MS pos late	57444					1.22		0.7925	0.6468		0.9204	1.0467	1.225		100	100		Lipid	Hexosylceramides (HCER)	100015752		3839	826.677
	3078			glycosyl ceramide (d18:1/20:0, d16:1/22:0)*	LC/MS pos late	57595					1.14		0.2975	0.4459		0.9411	1.0261	1.141		100	100		Lipid	Hexosylceramides (HCER)	100015882		3414	756.635
	3082			glycosyl ceramide (d18:2/24:1, d18:1/24:2)*	LC/MS pos late	57453					1.08		0.4722	0.5283		0.9406	0.958	1.0828		100	100		Lipid	Hexosylceramides (HCER)	100015745		3380	808.666
	3087		Lactosylceramides (LCER)	lactosyl-N-palmitoyl-sphingosine (d18:1/16:0)	LC/MS pos late	53010			53477895		1.02		0.9425	0.6911		1.0186	1.0289	1.0232		100	100		Lipid	Lactosylceramides (LCER)	100009030	4201-62-1	2527	862.625
	3090			lactosyl-N-behenoyl-sphingosine (d18:1/22:0)*	LC/MS pos late	57422		HMDB0011594	44260143		1.2		0.5776	0.5802		1.0076	1.0478	1.2011		83	94		Lipid	Lactosylceramides (LCER)	100015623		3842	946.719
	3091			lactosyl-N-nervonoyl-sphingosine (d18:1/24:1)*	LC/MS pos late	57370					0.99		0.4874	0.5339		1.1212	1.1234	0.986		100	100		Lipid	Lactosylceramides (LCER)	100015620		3778	972.735
	3098		Dihydrosphingomyelins	myristoyl dihydrosphingomyelin (d18:0/14:0)*	LC/MS pos late	57365		HMDB0012085	44260138		1.06		0.3475	0.4699		1.0748	1.1324	1.0633		100	100		Lipid	Dihydrosphingomyelins	100009038		2060	677.559
	3099			palmitoyl dihydrosphingomyelin (d18:0/16:0)*	LC/MS pos late	52434		HMDB0010168	9939965		1.04		0.2061	0.3812		0.9903	1.0202	1.044		100	100		Lipid	Dihydrosphingomyelins	100008954		2290	705.591
	3100			behenoyl dihydrosphingomyelin (d18:0/22:0)*	LC/MS pos late	57331		HMDB0012091	44260132		1.04		0.9407	0.6911		1.1181	1.1313	1.0361		100	100		Lipid	Dihydrosphingomyelins	100009026		3300	789.684
	3101			sphingomyelin (d18:0/18:0, d19:0/17:0)*	LC/MS pos late	57473		HMDB0012087	44260130		0.91		0.0622	0.2321		1.1497	1.0272	0.9056		100	100		Lipid	Dihydrosphingomyelins	100009027		2500	733.622
	3102			sphingomyelin (d18:0/20:0, d16:0/22:0)*	LC/MS pos late	57476					0.96		0.2338	0.4037		1.1744	1.1406	0.9563		100	100		Lipid	Dihydrosphingomyelins	100015786		2850	761.653
	3103		Sphingomyelins	palmitoyl sphingomyelin (d18:1/16:0)	LC/MS pos late	37506		HMDB0010169	9939941		1.02		0.5101	0.5482		1.0054	1.0175	1.0171		100	100		Lipid	Sphingomyelins	100002107	6254-89-3	2168	703.575
	3104			hydroxypalmitoyl sphingomyelin (d18:1/16:0(OH))**	LC/MS pos late	62851					1.1		0.0455	0.2112		1.0058	1.0853	1.0981		100	100		Lipid	Sphingomyelins	100021000		2056	719.57
	3105			stearoyl sphingomyelin (d18:1/18:0)	LC/MS pos late	19503	C00550	HMDB0001348	6453725		0.92		0.0047	0.1067		1.0711	0.9767	0.9186		100	100		Lipid	Sphingomyelins	1538	85187-10-6;85187-10-6	2450	731.606
	3106			behenoyl sphingomyelin (d18:1/22:0)*	LC/MS pos late	48492		HMDB0012103	44260125		1.05		0.7419	0.6386		1.006	1.0231	1.0504		100	100		Lipid	Sphingomyelins	100006294		3250	787.669
	3107			tricosanoyl sphingomyelin (d18:1/23:0)*	LC/MS pos late	52436		HMDB0012105			1.01		0.9388	0.6911		1.029	1.0314	1.0083		100	100		Lipid	Sphingomyelins	100008955		3350	801.684
	3108			lignoceroyl sphingomyelin (d18:1/24:0)	LC/MS pos late	57330					1.01		0.8589	0.6717		1.0049	0.9988	1.0068		100	100		Lipid	Sphingomyelins	100006298	60037-60-7	3437	815.7
	3109			sphingomyelin (d18:2/18:1)*	LC/MS pos late	57474		HMDB0001348	52931155		0.91		0.0225	0.1749		1.0655	0.947	0.9096		100	100		Lipid	Sphingomyelins	100015788		2025	727.575
	3110			sphingomyelin (d18:2/23:1)*	LC/MS pos late	57482					0.95		0.0619	0.2321		1.0259	0.9608	0.9471		100	100		Lipid	Sphingomyelins	100015791		2500	797.653
	3111			sphingomyelin (d18:2/24:2)*	LC/MS pos late	57479					0.98		0.3931	0.4953		0.9842	0.9551	0.9799		100	100		Lipid	Sphingomyelins	100015789		2400	809.653
	3112			sphingomyelin (d17:1/14:0, d16:1/15:0)*	LC/MS pos late	62152					1.1		0.2637	0.4237		1.1752	1.2279	1.0996		100	100		Lipid	Sphingomyelins	100020276		1950	661.528
	3113			sphingomyelin (d18:1/14:0, d16:1/16:0)*	LC/MS pos late	42463		HMDB0012097	11433862		1.03		0.4842	0.5336		1.0053	1.022	1.0253		100	100		Lipid	Sphingomyelins	100004328		1998	675.544
	3114			sphingomyelin (d18:2/14:0, d18:1/14:1)*	LC/MS pos late	47154					1.1		0.1345	0.312		0.9792	1.0351	1.0961		100	100		Lipid	Sphingomyelins	100005985		1860	673.528
	3115			sphingomyelin (d17:1/16:0, d18:1/15:0, d16:1/17:0)*	LC/MS pos late	52433					0.99		0.6515	0.6044		1.0786	1.061	0.9939		100	100		Lipid	Sphingomyelins	100006314	121999-58-4	2082	689.559
	3116			sphingomyelin (d17:2/16:0, d18:2/15:0)*	LC/MS pos late	57483					1.03		0.9608	0.6949		1.2047	1.1906	1.0259		100	100		Lipid	Sphingomyelins	100015793		1875	687.544
	3117			sphingomyelin (d18:2/16:0, d18:1/16:1)*	LC/MS pos late	42459					1		0.9186	0.6851		1.0231	1.0136	1.0032		100	100		Lipid	Sphingomyelins	100004329		2002	701.559
	3118			sphingomyelin (d18:1/17:0, d17:1/18:0, d19:1/16:0)	LC/MS pos late	52615			46891763		0.93		0.0136	0.1501		1.0397	0.961	0.9308		100	100		Lipid	Sphingomyelins	100008920	121999-64-2	2350	717.591
	3119			sphingomyelin (d18:1/18:1, d18:2/18:0)	LC/MS pos late	37529		HMDB0012101	6443882		0.93		0.0281	0.1831		1.0532	0.9653	0.9288		100	100		Lipid	Sphingomyelins	100002106	108392-10-5	2167	729.591
	3120			sphingomyelin (d18:1/19:0, d19:1/18:0)*	LC/MS pos late	57475					0.92		0.0196	0.1648		1.0804	0.9815	0.921		100	100		Lipid	Sphingomyelins	100015787		2550	745.622
	3121			sphingomyelin (d18:1/20:0, d16:1/22:0)*	LC/MS pos late	48490		HMDB0012102	44260124		0.97		0.206	0.3812		1.0434	1.0119	0.9743		100	100		Lipid	Sphingomyelins	100006290		2800	759.638
	3122			sphingomyelin (d18:1/20:1, d18:2/20:0)*	LC/MS pos late	48491					0.96		0.0467	0.2118		1.0207	0.9712	0.9572		100	100		Lipid	Sphingomyelins	100006292	222403-67-0	2450	757.622
	3123			sphingomyelin (d18:1/20:2, d18:2/20:1, d16:1/22:2)*	LC/MS pos late	57481					0.89		0.0218	0.1736		1.0748	0.9512	0.8926		100	100		Lipid	Sphingomyelins	100006293		2200	755.606
	3124			sphingomyelin (d18:1/21:0, d17:1/22:0, d16:1/23:0)*	LC/MS pos late	52495					1.01		0.9575	0.6948		1.0208	1.0202	1.0148		100	100		Lipid	Sphingomyelins	100009025		3000	773.653
	3125			sphingomyelin (d18:2/21:0, d16:2/23:0)*	LC/MS pos late	57480					0.98		0.3073	0.4535		1.0491	1.018	0.98		100	100		Lipid	Sphingomyelins	100015790		2500	771.637
	3126			sphingomyelin (d18:1/22:1, d18:2/22:0, d16:1/24:1)*	LC/MS pos late	48493		HMDB0012104			0.96		0.0795	0.255		0.9713	0.9261	0.9591		100	100		Lipid	Sphingomyelins	100006295		2775	785.653
	3127			sphingomyelin (d18:1/22:2, d18:2/22:1, d16:1/24:2)*	LC/MS pos late	57477					0.93		0.0611	0.2321		1.0771	1.0006	0.9299		100	100		Lipid	Sphingomyelins	100006296		2350	783.637
	3128			sphingomyelin (d18:2/23:0, d18:1/23:1, d17:1/24:1)*	LC/MS pos late	52435			134757653		1		0.8126	0.6553		0.9354	0.9237	1.0003		100	100		Lipid	Sphingomyelins	100008956		3000	799.669
	3129			sphingomyelin (d18:1/24:1, d18:2/24:0)*	LC/MS pos late	47153		HMDB0012107	44260126		1.02		0.8642	0.6733		1.0034	0.9931	1.0217		100	100		Lipid	Sphingomyelins	100005986	94359-13-4	3200	813.684
	3130			sphingomyelin (d18:2/24:1, d18:1/24:2)*	LC/MS pos late	52437			85336023		0.97		0.1252	0.3037		1.0208	0.9868	0.972		100	100		Lipid	Sphingomyelins	100008957		2750	811.669
	3131			sphingomyelin (d18:1/25:0, d19:0/24:1, d20:1/23:0, d19:1/24:0)*	LC/MS pos late	57478					0.9		0.0132	0.1497		1.1947	1.0555	0.899		100	100		Lipid	Sphingomyelins	100015792		3500	829.716
	3134		Ceramide PEs	palmitoyl-sphingosine-phosphoethanolamine (d18:1/16:0)	LC/MS pos late	62984					1		0.7565	0.6429		1.0307	1.015	1.0007		100	100		Lipid	Ceramide PEs	100021162		2207	661.528
	3159		Sphingosines	sphingosine	LC/MS pos late	17747	C00319	HMDB0000252	5280335		1.69		0.5515	0.5718		1.2266	1.6489	1.6937		100	100		Lipid	Sphingosines	297	123-78-4	1393	300.29
	3161			sphingosine 1-phosphate	LC/MS pos late	34445	C06124	HMDB0000277	5283560		1.14		0.9352	0.6908		1.154	1.237	1.1442		100	100		Lipid	Sphingosines	100000626	26993-30-6	1375	380.256
	3167			hexadecasphingosine (d16:1)*	LC/MS pos late	57428			14767871		1.62		0.026	0.1804		0.9048	1.2659	1.6229		72	94		Lipid	Sphingosines	100015723		1289	272.258
	3175		Mevalonate Metabolism	3-hydroxy-3-methylglutarate	LC/MS polar	531	C03761	HMDB0000355	1662;5459993		1.03		0.9901	0.7011		1.0624	1.0454	1.0262		100	100		Lipid	Mevalonate Metabolism	112	503-49-1	2850	161.046
	3191		Sterol	cholesterol	LC/MS pos late	63	C00187	HMDB0000067	6432564;11025495;5997		1.05		0.1228	0.302		0.9807	1.0173	1.0481		100	100		Lipid	Sterol	266	57-88-5	2707	369.352
	3192			cholesterol sulfate	LC/MS polar	35324	C18043	HMDB00653	65076		1.19		0.0147	0.1523		0.9682	1.1382	1.1864		100	100		Lipid	Sterol	100001606	2864-50-8	681	465.304
	3205			7-alpha-hydroxy-3-oxo-4-cholestenoate (7-Hoca)	LC/MS neg	36776	C17337	HMDB0012458	3081085		1.04		0.9834	0.6983		1.0452	1.0187	1.0367		100	100		Lipid	Sterol	100001609	115538-85-7	5288.1	429.301
	3207			3beta,7alpha-dihydroxy-5-cholestenoate	LC/MS neg	36803	C17335	HMDB0012454	3081084		0.92		0.106	0.2849		1.508	1.0884	0.9237		83	78		Lipid	Sterol	100001611	115538-84-6	5275	431.317
	3208			3beta-hydroxy-5-cholestenoate	LC/MS neg	54805	C17333		165511		1.27		0.7903	0.6468		1.104	1.2391	1.2667		100	100		Lipid	Sterol	100006370	6561-58-6	5398	415.322
	3218			4-cholesten-3-one	LC/MS pos late	38125	C00599	HMDB0000921	91477		1.03		0.9629	0.6959		1.0275	1.0264	1.0251		100	100		Lipid	Sterol	100002227	601-57-0	2520	385.346
	3220			beta-sitosterol	LC/MS pos late	27414	C01753	HMDB0000852	222284		1.39		0.5052	0.5451		1.0445	1.085	1.3856		72	89		Lipid	Sterol	100001033	83-46-5	3054	397.383
	3223			campesterol	LC/MS pos late	33997	C01789	HMDB0002869	173183		1.08		0.9269	0.6878		1.1593	1.1204	1.0846		100	83		Lipid	Sterol	100001269	474-62-4	2873	383.367
	3242		Pregnenolone Steroids	pregnenolone sulfate	LC/MS neg	38170	C18044	HMDB0000774	105074		1.27		0.7692	0.6453		0.9805	1.0957	1.2727		94	94		Lipid	Pregnenolone Steroids	100002129	1247-64-9	5100	395.19
	3246			17alpha-hydroxypregnenolone 3-sulfate	LC/MS neg	37482		HMDB00416	152971		1.56		0.8913	0.6831		0.8581	0.8662	1.56		78	83		Lipid	Pregnenolone Steroids	100002128	28901-70-4	4800	411.185
	3247			17alpha-hydroxypregnanolone glucuronide	LC/MS neg	47403					0.93		0.1316	0.3099		1.2131	1.0619	0.929		89	83		Lipid	Pregnenolone Steroids	100005418		5071.9	509.276
	3249			21-hydroxypregnenolone monosulfate (1)	LC/MS neg	37174			174681		1.06		0.106	0.2849		1.1436	0.8659	1.0562		78	83		Lipid	Pregnenolone Steroids	100002003	88378-34-1	4624	411.185
	3250			21-hydroxypregnenolone monosulfate (2)	LC/MS neg	37175			10670474		1.11		0.7472	0.6404		0.6972	0.7394	1.1089		50	44		Lipid	Pregnenolone Steroids	100002004		4711	411.185
	3252			21-hydroxypregnenolone disulfate	LC/MS neg	46115			134595		0.97		0.1882	0.3708		1.034	0.8931	0.9688		94	100		Lipid	Pregnenolone Steroids	100001999	1164-98-3	3935	245.067
	3258			pregnenediol sulfate (C21H34O5S)*	LC/MS neg	32619	C18044	HMDB0000774	105074		1.23		0.6971	0.6225		1.4085	1.3389	1.2258		100	100		Lipid	Pregnenolone Steroids	100002067	1247-64-9	5000	397.205
	3259			pregnenediol disulfate (C21H34O8S2)*	LC/MS neg	32562					0.95		0.172	0.3539		1.0778	0.965	0.9454		100	100		Lipid	Pregnenolone Steroids	100001993		3868	238.077
	3260			pregnenetriol sulfate*	LC/MS neg	62922			129671303		1.07		0.3523	0.4719		1.1426	1.0402	1.0673		94	100		Lipid	Pregnenolone Steroids	100021103		4749	413.2
	3261			pregnenetriol disulfate*	LC/MS neg	62921					0.91		0.0884	0.271		1.0654	0.9362	0.9079		100	100		Lipid	Pregnenolone Steroids	100021104		3504	246.075
	3269		Progestin Steroids	5alpha-pregnan-3beta-ol,20-one sulfate	LC/MS neg	37480					0.93		0.1802	0.3645		4.638	1.0543	0.9279		83	72		Lipid	Progestin Steroids	100002035	7730-00-9	5136	397.205
	3270			5alpha-pregnan-3beta,20beta-diol monosulfate (1)	LC/MS neg	37196		HMDB0240580			0.97		0.2376	0.4057		4.0511	1.0461	0.9654		100	100		Lipid	Progestin Steroids	100002009		5180	399.221
	3273			5alpha-pregnan-3beta,20alpha-diol monosulfate (2)	LC/MS neg	37200					0.89		0.1676	0.3499		4.8189	1.0932	0.8911		100	100		Lipid	Progestin Steroids	100002014		5060	399.221
	3279			5alpha-pregnan-3beta,20alpha-diol disulfate	LC/MS neg	37198		HMDB0094650	118703093		0.82		0.0484	0.2151		6.4322	1.1123	0.824		100	100		Lipid	Progestin Steroids	100001988		3962	239.085
	3280			5alpha-pregnan-diol disulfate	LC/MS neg	46172		HMDB0240582 HMDB0240581	3082277;5127902		1.03		0.3039	0.4519		5.9812	0.7709	1.0318		67	72		Lipid	Progestin Steroids	100002015		4310	239.085
	3282			pregnanediol-3-glucuronide	LC/MS neg	40708		HMDB0010318	123796		1		0.2061	0.3812		2.8286	1.0062	0.996		100	100		Lipid	Progestin Steroids	100003470	1852-49-9	5145	495.296
	3287			pregnanolone/allopregnanolone sulfate	LC/MS neg	48394	C05480	HMDB0240591 HMDB0062782	31402;129699967		1.12		0.57	0.5782		5.6453	1.0593	1.1222		89	83		Lipid	Progestin Steroids	100006173		5160	397.205
	3296		Corticosteroids	corticosterone	LC/MS neg	5983	C02140	HMDB0001547	5753		1.24		0.3787	0.4854		1.1266	0.819	1.2409		72	56		Lipid	Corticosteroids	272	50-22-6	5040	345.207
	3304			cortisol	LC/MS polar	1712	C00735	HMDB0000063	5754		0.92		0.0941	0.2739		3.074	1.1262	0.9176		100	100		Lipid	Corticosteroids	356	50-23-7	832	407.208
	3308			tetrahydrocortisol	LC/MS neg	33992	C05472	HMDB0000949	5864		1					1	1	1		6	0		Lipid	Corticosteroids	100001288	53-02-1	5079	365.233
	3309			tetrahydrocortisol glucuronide	LC/MS neg	64411					1.81		0.9959	0.7032		1.8734	1.2699	1.8076		100	100		Lipid	Corticosteroids	100022013		4666	541.265
	3310			tetrahydrocortisol sulfate (1)	LC/MS neg	62793					0.92		0.1113	0.2918		1.5288	1.2888	0.9243		83	94		Lipid	Corticosteroids	100020848		4276	445.19
	3314			cortisone	LC/MS neg	1769	C00762	HMDB0002802	222786		1.1		0.9727	0.6967		1.038	1.0316	1.1003		94	100		Lipid	Corticosteroids	273	53-06-5	4575	359.186
	3322			tetrahydrocortisone glucuronide (5)	LC/MS neg	64591					0.94		0.1614	0.3427		1.1709	0.9828	0.9431		100	100		Lipid	Corticosteroids	100022127		4684	539.25
	3325			cortolone glucuronide (1)	LC/MS neg	57699					1.07		0.5081	0.5472		1.0153	1.035	1.0733		94	100		Lipid	Corticosteroids	100015971		4600	541.265
	3335		Androgenic Steroids	11-ketoetiocholanolone glucuronide	LC/MS neg	47135					1.23		0.9671	0.6967		1.1981	1.3656	1.229		100	94		Lipid	Androgenic Steroids	100005402	17181-16-7	4280	479.229
	3336			dehydroepiandrosterone sulfate (DHEA-S)	LC/MS neg	32425	C04555	HMDB0001032	12594		1.02		0.8928	0.6831		1.1996	1.2171	1.0235		100	100		Lipid	Androgenic Steroids	100000792	651-48-9	4745	367.158
	3338			16a-hydroxy DHEA 3-sulfate	LC/MS neg	38168		HMDB0062544	20848950		1.03		0.7617	0.6442		1.2739	1.3067	1.0252		100	100		Lipid	Androgenic Steroids	100002126		4240	383.153
	3339			androsterone glucuronide	LC/MS neg	61846	C11135	HMDB0002829	114833		1		0.5338	0.5598		1.0883	1.0104	1.0023		94	94		Lipid	Androgenic Steroids	100002761	1852-43-3	4953	465.249
	3341			epiandrosterone sulfate	LC/MS neg	33973	C04555	HMDB0062657	9929317		0.92		0.1295	0.3065		1.0062	0.9752	0.9246		94	94		Lipid	Androgenic Steroids	100001287	22229-22-7	4855	369.174
	3349			androsterone sulfate	LC/MS neg	31591		HMDB0002759	159663		0.92		0.1037	0.283		0.991	0.9588	0.9217		100	94		Lipid	Androgenic Steroids	100001073	2479-86-9	5022	369.174
	3352			etiocholanolone glucuronide	LC/MS neg	47112		HMDB0004484	270605		1		0.412	0.5033		1.3863	1.2128	0.9971		94	100		Lipid	Androgenic Steroids	100005403	3602-09-03	4915	465.249
	3356			11beta-hydroxyetiocholanolone glucuronide*	LC/MS neg	64418					1.42		0.6457	0.6031		1.1759	1.6135	1.4181		94	89		Lipid	Androgenic Steroids	100020542	17181-15-6	4160	481.244
	3357			5alpha-androstan-3alpha,17alpha-diol monosulfate	LC/MS neg	37183		HMDB0000412			1.12		0.5998	0.5873		0.8691	0.9836	1.1246		89	72		Lipid	Androgenic Steroids	100002008		5208	371.19
	3359			androstenediol (3beta,17beta) monosulfate (1)	LC/MS neg	37211		HMDB0240429	13847309;129670631		1.14		0.289	0.4403		1.0098	1.1205	1.142		94	94		Lipid	Androgenic Steroids	100002028	521-17-5	4535	369.174
	3360			androstenediol (3beta,17beta) monosulfate (2)	LC/MS neg	37210		HMDB0186954 HMDB0240429			0.99		0.4623	0.5249		1.0169	1.0214	0.9899		94	94		Lipid	Androgenic Steroids	100002029		4500	369.174
	3362			androstenediol (3beta,17beta) disulfate (1)	LC/MS neg	37202	C04295	HMDB0240313	87120982		0.95		0.217	0.389		1.0273	0.9806	0.9484		100	100		Lipid	Androgenic Steroids	100001992		3740	224.062
	3363			androstenediol (3beta,17beta) disulfate (2)	LC/MS neg	37203		HMDB0240313	87120982		0.99		0.3643	0.4768		0.9927	0.9456	0.9886		100	100		Lipid	Androgenic Steroids	100001994		4065	224.062
	3366			androstenediol (3alpha, 17alpha) monosulfate (2)	LC/MS neg	37207					1.14		0.9791	0.6983		1.1792	1.2055	1.1386		94	94		Lipid	Androgenic Steroids	100002026		4712	369.174
	3367			androstenediol (3alpha, 17alpha) monosulfate (3)	LC/MS neg	37209					1.02		0.5538	0.573		1.0671	1.1162	1.0233		94	94		Lipid	Androgenic Steroids	100002027		5180	369.174
	3377			5alpha-androstan-3alpha,17beta-diol monosulfate (1)	LC/MS neg	37186			121596226;121596225		1.06		0.826	0.6604		1.0596	1.1437	1.0601		94	94		Lipid	Androgenic Steroids	100002018		4925	371.19
	3378			5alpha-androstan-3alpha,17beta-diol monosulfate (2)	LC/MS neg	37185			121596225		1.08		0.3958	0.4959		2.1097	2.3986	1.0801		89	89		Lipid	Androgenic Steroids	100006005		5080	371.19
	3379			5alpha-androstan-3alpha,17beta-diol disulfate	LC/MS neg	37184		HMDB0094682	56639109		1.02		0.4274	0.5109		1.5927	1.5679	1.0227		78	72		Lipid	Androgenic Steroids	100002017		4275	225.07
	3380			5alpha-androstan-3alpha,17beta-diol 17-glucuronide	LC/MS neg	47132					1.18		0.3059	0.4534		1.5771	1.6324	1.1837		61	78		Lipid	Androgenic Steroids	100005396		4930	467.265
	3384			5alpha-androstan-3beta,17beta-diol monosulfate (2)	LC/MS neg	37192					1.05		0.8811	0.6786		0.9454	1.046	1.0532		89	89		Lipid	Androgenic Steroids	100002024		4685	371.19
	3385			5alpha-androstan-3beta,17beta-diol disulfate	LC/MS neg	37190	C12525	HMDB00493	90186325		0.96		0.208	0.3825		1.1016	1.1358	0.9553		94	94		Lipid	Androgenic Steroids	100001987	571-20-0	3880	225.07
	3388			5alpha-androstan-3beta,17alpha-diol disulfate	LC/MS neg	37187		HMDB0094682	56639109		1.09		0.8925	0.6831		1.1297	1.1212	1.0936		83	78		Lipid	Androgenic Steroids	100002021		4215	225.07
	3392			andro steroid monosulfate C19H28O6S (1)*	LC/MS neg	32827		HMDB0002759	159663		0.91		0.0963	0.2762		1.0967	0.9186	0.9101		94	94		Lipid	Androgenic Steroids	100002152		3871	383.153
	3400			11beta-hydroxyandrosterone glucuronide	LC/MS neg	63251					1.19		0.9521	0.694		1.059	1.0045	1.1915		100	100		Lipid	Androgenic Steroids	100020541		4209	481.244
	3425		Estrogenic Steroids	estrone 3-sulfate	LC/MS neg	18474	C02538	HMDB0001425	3001028		1.02		0.458	0.5226		2.7952	1.6106	1.0183		67	61		Lipid	Estrogenic Steroids	1230	438-67-5	4417.3	349.112
	3452		Primary Bile Acid Metabolism	cholate	LC/MS neg	22842	C00695	HMDB0000619	221493		3.62		0.2348	0.4042		2.4064	4.1762	3.6206		100	100		Lipid	Primary Bile Acid Metabolism	136	81-25-4	5165	407.28
	3453			glycocholate	LC/MS neg	18476	C01921	HMDB0000138	10140		1.43		0.4854	0.5336		1.3369	1.7088	1.4257		100	100		Lipid	Primary Bile Acid Metabolism	342	475-31-0;863-57-0	5163	464.302
	3454			taurocholate	LC/MS neg	18497	C05122	HMDB0000036	46783527;6675		1.85		0.5287	0.5561		2.2544	3.1815	1.8463		100	100		Lipid	Primary Bile Acid Metabolism	1648	145-42-6	5150	514.284
	3455			chenodeoxycholate	LC/MS neg	1563	C02528	HMDB0000518	10133		1.54		0.0592	0.2321		1.2748	1.6961	1.5426		100	100		Lipid	Primary Bile Acid Metabolism	1123	474-24-9;474-25-9	5264	391.285
	3456			chenodeoxycholic acid sulfate (1)	LC/MS neg	63607		HMDB0002522	21252308		1.21		0.9548	0.6944		1.1737	1.0586	1.2123		83	89		Lipid	Primary Bile Acid Metabolism	100021650		4531	235.117
	3460			glycochenodeoxycholate	LC/MS neg	32346	C05466	HMDB0000637	12544		1.62		0.1132	0.2956		1.0662	1.3151	1.622		100	100		Lipid	Primary Bile Acid Metabolism	1628	16564-43-5	5236.1	448.307
	3461			taurochenodeoxycholate	LC/MS neg	18494	C05465	HMDB0000951	387316		1.66		0.7171	0.6307		1.5953	1.5931	1.6575		100	100		Lipid	Primary Bile Acid Metabolism	1629	6009-98-9	5250	498.289
	3465			tauro-beta-muricholate	LC/MS neg	33983		HMDB0000932	121596216;168408;21124703		2.26		0.1916	0.371		1.4371	1.7997	2.2564		83	94		Lipid	Primary Bile Acid Metabolism	100001250	25696-60-0	4774	514.284
	3468			glyco-beta-muricholate**	LC/MS neg	62066					1.68		0.0573	0.2277		1.1428	1.6339	1.6771		94	100		Lipid	Primary Bile Acid Metabolism	100020214		4762	464.302
	3470			cholic acid glucuronide	LC/MS neg	62571		HMDB0002577	21252309		1.53		0.9999	0.7035		1.2973	1.6424	1.5299		89	83		Lipid	Primary Bile Acid Metabolism	100020549		4512	583.312
	3471			glycochenodeoxycholate glucuronide (1)	LC/MS neg	52983		HMDB0002579	44263370		1.23		0.1515	0.33		1.0342	1.1156	1.2346		100	100		Lipid	Primary Bile Acid Metabolism	100009264		4806	311.666
	3473			glycochenodeoxycholate 3-sulfate	LC/MS neg	52974		HMDB0002409 HMDB0002497 HMDB0002496	11954205;21125002;21116917		1.57		0.129	0.3065		1.0137	1.3844	1.57		100	100		Lipid	Primary Bile Acid Metabolism	100006641		4820	263.628
	3474			glycocholate glucuronide (1)	LC/MS neg	52977			44263357		1.5		0.5821	0.5829		1.5268	1.5361	1.5005		61	72		Lipid	Primary Bile Acid Metabolism	100009259		4533	640.334
	3477		Secondary Bile Acid Metabolism	deoxycholate	LC/MS neg	1114	C04483	HMDB0000626	222528;440355		1.64		0.0715	0.2476		0.9753	1.2394	1.6439		100	100		Lipid	Secondary Bile Acid Metabolism	302	83-44-3	5294	391.285
	3480			deoxycholic acid 12-sulfate*	LC/MS neg	63688					1.93		0.1335	0.3104		1.1719	1.4338	1.9299		100	100		Lipid	Secondary Bile Acid Metabolism	100021712		4580	235.117
	3482			deoxycholic acid glucuronide	LC/MS neg	63610					1.29		0.7071	0.6265		1.5818	1.7649	1.2885		100	100		Lipid	Secondary Bile Acid Metabolism	100020550		4800	567.317
	3485			glycodeoxycholate	LC/MS neg	18477	C05464	HMDB00631	3035026		2.28		0.0943	0.2739		1.1126	1.3808	2.2774		89	100		Lipid	Secondary Bile Acid Metabolism	100000436	360-65-6	5281	448.307
	3487			taurodeoxycholate	LC/MS neg	12261	C05463	HMDB0000896	2733768		2.86		0.1958	0.374		1.6068	1.6971	2.864		100	100		Lipid	Secondary Bile Acid Metabolism	1668	207737-97-1	5257.4	498.289
	3488			taurodeoxycholic acid 3-sulfate	LC/MS neg	62889					1.74		0.246	0.4134		1.2253	1.391	1.7394		89	100		Lipid	Secondary Bile Acid Metabolism	100006644		4850	288.62
	3495			lithocholate sulfate (1)	LC/MS neg	62526			451489		1.8		0.8742	0.6769		1.1221	0.9966	1.8008		83	89		Lipid	Secondary Bile Acid Metabolism	100020823		4811	227.12
	3496			lithocholic acid sulfate (2)	LC/MS neg	62527					1.52		0.7879	0.6468		1.3006	0.8094	1.5234		61	56		Lipid	Secondary Bile Acid Metabolism	100020824		5028	227.12
	3497			glycolithocholate	LC/MS neg	31912	C15557	HMDB00698	115245		2.53		0.3883	0.4906		1.4166	1.497	2.5271		78	89		Lipid	Secondary Bile Acid Metabolism	100001064	474-74-8	5357.1	432.312
	3498			glycolithocholate sulfate*	LC/MS neg	32620	C11301	HMDB0002639	72222		1.94		0.2895	0.4403		1.1191	1.2154	1.9373		100	100		Lipid	Secondary Bile Acid Metabolism	100001657	15324-64-8	5011	255.631
	3499			taurolithocholate	LC/MS neg	31889	C02592	HMDB0000722	439763		1.27		0.8343	0.6631		0.9179	1.0022	1.2663		56	56		Lipid	Secondary Bile Acid Metabolism	100001065	516-90-5	5345	482.295
	3500			taurolithocholate 3-sulfate	LC/MS neg	36850	C03642	HMDB0002580	440071		2.22		0.1207	0.3016		1.302	1.3677	2.2194		100	100		Lipid	Secondary Bile Acid Metabolism	100001658	64936-83-0	5027	280.622
	3502			ursodeoxycholate	LC/MS neg	1605	C07880	HMDB0000946	31401		4.47		0.0235	0.1753		3.5559	2.6474	4.4705		89	100		Lipid	Secondary Bile Acid Metabolism	1135	128-13-2	5055	391.285
	3507			isoursodeoxycholate	LC/MS neg	57577	C17662	HMDB0000686	127601		1.58		0.3804	0.4865		4.0911	2.6643	1.581		100	100		Lipid	Secondary Bile Acid Metabolism	100002488	78919-26-3	4809	391.285
	3508			isoursodeoxycholate sulfate (1)	LC/MS neg	63602					1.15		0.5944	0.5858		1.0347	0.6367	1.1492		56	56		Lipid	Secondary Bile Acid Metabolism	100021647		4082	235.117
	3512			glycoursodeoxycholate	LC/MS neg	39379		HMDB0000708	12310288		1.88		0.1719	0.3539		2.5367	2.049	1.8759		100	100		Lipid	Secondary Bile Acid Metabolism	100002911	64480-66-6	5033	448.307
	3515			glycoursodeoxycholic acid sulfate (1)	LC/MS neg	63731					1.55		0.2585	0.4221		2.3422	1.9771	1.5512		94	100		Lipid	Secondary Bile Acid Metabolism	100020819		4309	263.628
	3516			tauroursodeoxycholate	LC/MS neg	39378		HMDB0000874	9848818		1.39		0.6359	0.6019		2.8245	2.4444	1.39		83	78		Lipid	Secondary Bile Acid Metabolism	100002912	14605-22-2	5025	498.289
	3523			hyocholate	LC/MS neg	34093	C17649	HMDB0000760	92805		1.24		0.4521	0.521		1.3356	1.3547	1.2425		94	100		Lipid	Secondary Bile Acid Metabolism	100001279	547-75-1	5046	407.28
	3524			glycohyocholate	LC/MS neg	42574		HMDB0000138	71361462		1.54		0.2358	0.4042		1.0337	1.4701	1.5437		100	100		Lipid	Secondary Bile Acid Metabolism	100004083		5020	464.302
	3533			glycocholenate sulfate*	LC/MS neg	32599					0.8		0.0044	0.1067		1.4193	1.1239	0.8025		100	100		Lipid	Secondary Bile Acid Metabolism	100001989		4750	254.623
	3534			taurocholenate sulfate*	LC/MS neg	32807					0.95		0.1902	0.371		1.1817	1.0126	0.9523		100	100		Lipid	Secondary Bile Acid Metabolism	100001990		4750	279.614
	3537			3b-hydroxy-5-cholenoic acid	LC/MS neg	43507		HMDB0000308	92997		0.91		0.075	0.2515		1.3603	1.082	0.9062		100	100		Lipid	Secondary Bile Acid Metabolism	100004182	5255-17-4	5205	373.275
	3538			glycodeoxycholate 3-sulfate	LC/MS neg	52975			101602538		1.62		0.0264	0.1809		1.0027	1.2063	1.6171		94	100		Lipid	Secondary Bile Acid Metabolism	100006642		4875	263.628
	3539			taurochenodeoxycholic acid 3-sulfate	LC/MS neg	62890		HMDB0002486	52931550		1.58		0.2875	0.4402		1.3472	1.9695	1.5819		94	100		Lipid	Secondary Bile Acid Metabolism	100021093		4809	288.62
	4117	Nucleotide	Purine Metabolism, (Hypo)Xanthine/Inosine containing	inosine	LC/MS neg	1123	C00294	HMDB0000195	6021		0.92		0.1387	0.316		1.1128	0.9409	0.9237		100	100		Nucleotide	Purine Metabolism, (Hypo)Xanthine/Inosine containing	361	58-63-9	1602.1	267.073
	4118			hypoxanthine	LC/MS neg	3127	C00262	HMDB0000157	790;135398638		0.91		0.0874	0.2698		1.2666	1.0183	0.9083		100	100		Nucleotide	Purine Metabolism, (Hypo)Xanthine/Inosine containing	171	68-94-0	1291.2	135.031
	4119			xanthine	LC/MS polar	3147	C00385	HMDB0000292	1188		0.92		0.1043	0.283		1.2461	1.2843	0.9226		100	100		Nucleotide	Purine Metabolism, (Hypo)Xanthine/Inosine containing	1004	69-89-6	2023	151.026
	4121			xanthosine	LC/MS neg	15136	C01762	HMDB0000299	64959		1		0.526	0.5541		1.0869	1.0879	1.0047		100	100		Nucleotide	Purine Metabolism, (Hypo)Xanthine/Inosine containing	100000299	146-80-5	1075	283.068
	4124			N1-methylinosine	LC/MS pos early	48351		HMDB0002721	650095		1.1		0.0224	0.1749		0.9718	1.0457	1.1045		100	100		Nucleotide	Purine Metabolism, (Hypo)Xanthine/Inosine containing	100001409	20245-33-4	1430	283.104
	4129			urate	LC/MS neg	1604	C00366	HMDB0000289	1175		1.01		0.9829	0.6983		1.0244	1.0237	1.0086		100	100		Nucleotide	Purine Metabolism, (Hypo)Xanthine/Inosine containing	1134	69-93-2;120K5305	757.1	167.021
	4131			allantoin	LC/MS polar	1107	C02350 C02348 C01551	HMDB0000462	204;439714;439713		1.03		0.4819	0.5322		0.9588	0.9742	1.0323		100	100		Nucleotide	Purine Metabolism, (Hypo)Xanthine/Inosine containing	1002	97-59-6	1672	157.037
	4137		Purine Metabolism, Adenine containing	adenosine 5'-monophosphate (AMP)	LC/MS pos early	32342	C00020	HMDB0000045	6083		1.79		0.6397	0.6031		1.2197	1.6133	1.7948		100	100		Nucleotide	Purine Metabolism, Adenine containing	209	149022-20-8	1013	348.07
	4140			adenosine 3',5'-cyclic monophosphate (cAMP)	LC/MS neg	2831	C00575	HMDB0000058	6076		0.99		0.4306	0.5121		1.0132	0.9719	0.9862		100	100		Nucleotide	Purine Metabolism, Adenine containing	207	60-92-4	1952.2	328.045
	4151			N1-methyladenosine	LC/MS pos early	15650	C02494	HMDB0003331	27476		1.04		0.1694	0.3509		0.9672	1.0043	1.0426		100	100		Nucleotide	Purine Metabolism, Adenine containing	1242	15763-06-1	2120	282.12
	4152			N6-methyladenosine	LC/MS neg	37114		HMDB0004044	102175		1.07		0.5582	0.5744		1.0013	1.0493	1.0699		100	100		Nucleotide	Purine Metabolism, Adenine containing	213	1867-73-8	2593	148.063
	4162			N6-carbamoylthreonyladenosine	LC/MS neg	35157		HMDB0041623	161466		1.11		0.3203	0.4574		0.9736	1.0143	1.1128		100	100		Nucleotide	Purine Metabolism, Adenine containing	100001415	24719-82-2	2164	411.127
	4172			N6-succinyladenosine	LC/MS neg	48130		HMDB0000912	165243		0.98		0.4706	0.5283		1.0673	1.0196	0.9847		100	100		Nucleotide	Purine Metabolism, Adenine containing	100001664	4542-23-8	940	382.1
	4184		Purine Metabolism, Guanine containing	7-methylguanine	LC/MS pos early	35114	C02242	HMDB0000897	135398679		1.06		0.0535	0.2243		0.9449	0.9979	1.0574		100	100		Nucleotide	Purine Metabolism, Guanine containing	100001456	578-76-7	2175	166.072
	4190			N2,N2-dimethylguanosine	LC/MS pos early	35137		HMDB0004824	135501639		1.06		0.3632	0.4762		0.9879	1.028	1.0573		100	100		Nucleotide	Purine Metabolism, Guanine containing	100001412	2140-67-2	2210	312.13
	4204		Pyrimidine Metabolism, Orotate containing	dihydroorotate	LC/MS polar	601	C00337	HMDB03349	648		0.91		0.0977	0.2778		1.1374	0.9913	0.9076		100	100		Nucleotide	Pyrimidine Metabolism, Orotate containing	923	155-54-4	1910	157.025
	4205			orotate	LC/MS polar	1505	C00295	HMDB0000226	967		1.06		0.9986	0.7032		1.1463	1.2684	1.0625		100	100		Nucleotide	Pyrimidine Metabolism, Orotate containing	445	50887-69-9	1638.1	155.01
	4207			orotidine	LC/MS polar	35172		HMDB0000788	92751		1.05		0.4784	0.5291		1.6782	1.9566	1.054		100	100		Nucleotide	Pyrimidine Metabolism, Orotate containing	100001416	314-50-1	2250	287.052
	4217		Pyrimidine Metabolism, Uracil containing	uridine	LC/MS neg	606	C00299	HMDB0000296	6029		0.98		0.372	0.4796		1.0547	0.9986	0.976		100	100		Nucleotide	Pyrimidine Metabolism, Uracil containing	535	58-96-8	1457.6	243.062
	4218			uracil	LC/MS neg	605	C00106	HMDB0000300	1174		1.06		0.8464	0.6653		1.1099	1.022	1.0569		83	100		Nucleotide	Pyrimidine Metabolism, Uracil containing	825	66-22-8	1086	111.02
	4219			pseudouridine	LC/MS neg	33442	C02067	HMDB0000767	15047		0.96		0.1265	0.3039		1.0554	1.0058	0.9573		100	100		Nucleotide	Pyrimidine Metabolism, Uracil containing	821	1445-07-4	1100	243.062
	4220			5,6-dihydrouridine	LC/MS neg	61833		HMDB0000497	94312		0.99		0.4958	0.537		1.0396	1.0237	0.9873		100	100		Nucleotide	Pyrimidine Metabolism, Uracil containing	100001425	5627-05-04	1119	245.078
	4221			2'-O-methyluridine	LC/MS neg	57655			102212		1.07		0.3683	0.4787		0.9809	1.0273	1.0735		89	94		Nucleotide	Pyrimidine Metabolism, Uracil containing	100010896	2140-76-3	1831	257.078
	4222			5-methyluridine (ribothymidine)	LC/MS neg	35136		HMDB0000884	445408		0.95		0.1486	0.3268		1.032	0.9677	0.9504		100	100		Nucleotide	Pyrimidine Metabolism, Uracil containing	100001446	1463-10-1	1778.1	257.078
	4229			5,6-dihydrouracil	LC/MS neg	1559	C00429	HMDB0000076	649		1.04		0.7257	0.6336		0.9708	1.0093	1.0394		100	100		Nucleotide	Pyrimidine Metabolism, Uracil containing	1125	504-07-4	1120	113.036
	4233			2'-deoxyuridine	LC/MS neg	52602	C00526	HMDB0000012	13712		0.95		0.1941	0.3732		1.0568	0.9054	0.9491		100	100		Nucleotide	Pyrimidine Metabolism, Uracil containing	536	951-78-0	1586	227.067
	4236			3-ureidopropionate	LC/MS pos early	3155	C02642	HMDB0000026	111		1.13		0.5688	0.5776		1.1176	1.0921	1.1348		100	100		Nucleotide	Pyrimidine Metabolism, Uracil containing	1053	462-88-4	875	133.061
	4237			beta-alanine	LC/MS pos early	55	C00099	HMDB0000056	239		1.34		0.7493	0.6404		1.212	1.38	1.3418		100	100		Nucleotide	Pyrimidine Metabolism, Uracil containing	244	56-41-7;107-95-9	1905	90.055
	4239			N-acetyl-beta-alanine	LC/MS neg	37432	C01073	HMDB0061880	76406		1.02		0.8645	0.6733		1.0518	1.0521	1.0209		100	100		Nucleotide	Pyrimidine Metabolism, Uracil containing	100002102	3025-95-4	773	130.051
	4242			3-(3-amino-3-carboxypropyl)uridine*	LC/MS neg	62924			171198		0.99		0.6557	0.6049		1.0605	1.0525	0.9941		100	100		Nucleotide	Pyrimidine Metabolism, Uracil containing	100001426	52745-94-5	1369	344.11
	4249		Pyrimidine Metabolism, Cytidine containing	cytidine	LC/MS neg	514	C00475	HMDB0000089	6175		0.89		0.0718	0.2476		1.017	0.7935	0.8922		78	78		Nucleotide	Pyrimidine Metabolism, Cytidine containing	827	65-46-3	1325	242.078
	4250			cytosine	LC/MS pos early	573	C00380	HMDB0000630	597		2.96		0.012	0.1439		0.8022	1.2877	2.9631		67	94		Nucleotide	Pyrimidine Metabolism, Cytidine containing	881	71-30-7	2060	112.051
	4252			3-methylcytidine	LC/MS pos early	35132		HMDB0240577	14237477		1.02		0.8333	0.6629		1.0523	1.0511	1.02		100	100		Nucleotide	Pyrimidine Metabolism, Cytidine containing	100001466	21028-20-6	2176	258.108
	4254			N4-acetylcytidine	LC/MS neg	35130		HMDB0005923	107461		1.18		0.023	0.1753		0.9654	1.0971	1.1786		100	100		Nucleotide	Pyrimidine Metabolism, Cytidine containing	100001413	3768-18-1	2040	284.089
	4262			2'-O-methylcytidine	LC/MS pos early	57554			150971		1		0.7432	0.6391		0.9835	0.9705	0.9994		100	100		Nucleotide	Pyrimidine Metabolism, Cytidine containing	100010895	2140-72-9	2411	258.108
	4278		Pyrimidine Metabolism, Thymine containing	5,6-dihydrothymine	LC/MS neg	1418	C00906	HMDB0000079	93556		1.04		0.9406	0.6911		1.0543	1.0336	1.0422		100	100		Nucleotide	Pyrimidine Metabolism, Thymine containing	158	696-04-8	1637.8	127.051
	4281			3-aminoisobutyrate	LC/MS pos early	1566	C05145	HMDB0002166	64956		0.87		0.0243	0.1753		1.24	1.0309	0.8686		100	100		Nucleotide	Pyrimidine Metabolism, Thymine containing	1114	10569-72-9;214139-20-5	2190	104.071
	4298	Cofactors and Vitamins	Nicotinate and Nicotinamide Metabolism	quinolinate	LC/MS polar	1899	C03722	HMDB0000232	1066		1.2		0.0546	0.2243		0.9766	1.0955	1.2028		100	100		Cofactors and Vitamins	Nicotinate and Nicotinamide Metabolism	182	89-00-9	3000	166.015
	4302			nicotinamide	LC/MS pos early	594	C00153	HMDB0001406	936		1.59		0.403	0.4976		0.9779	1.2969	1.5914		89	100		Cofactors and Vitamins	Nicotinate and Nicotinamide Metabolism	432	98-92-0	1942	123.055
	4314			1-methylnicotinamide	LC/MS pos early	27665	C02918	HMDB0000699	457		1.21		0.8627	0.6733		1.1182	1.3368	1.213		100	100		Cofactors and Vitamins	Nicotinate and Nicotinamide Metabolism	55	1005-24-9	1940	137.071
	4320			trigonelline (N'-methylnicotinate)	LC/MS pos early	32401	C01004	HMDB0000875	5570		2.88		0.0004	0.0314		0.8106	1.7639	2.8829		100	100		Cofactors and Vitamins	Nicotinate and Nicotinamide Metabolism	100001092	535-83-1	1388	138.055
	4322			N1-Methyl-2-pyridone-5-carboxamide	LC/MS neg	40469	C05842	HMDB0004193	69698		1.08		0.7285	0.6336		1.1132	1.1367	1.0807		100	100		Cofactors and Vitamins	Nicotinate and Nicotinamide Metabolism	100001468	701-44-0	1668	151.051
	4330		Riboflavin Metabolism	flavin adenine dinucleotide (FAD)	LC/MS neg	2134	C00016	HMDB0001248	643975		1.08		0.1902	0.371		0.9963	1.0582	1.0796		100	100		Cofactors and Vitamins	Riboflavin Metabolism	327	146-14-5;84366-81-4	2425	784.15
	4332		Pantothenate and CoA Metabolism	pantoate	LC/MS neg	63061	C00522		5289105		2.22		0.4508	0.5208		1.2201	2.3957	2.2151		100	100		Cofactors and Vitamins	Pantothenate and CoA Metabolism	100002613	470-29-1	1143	147.066
	4333			pantothenate	LC/MS neg	1508	C00864	HMDB0000210	6613		0.82		0.0033	0.1067		1.196	0.9998	0.821		100	100		Cofactors and Vitamins	Pantothenate and CoA Metabolism	1024	137-08-6	1498.7	218.103
	4345		Ascorbate and Aldarate Metabolism	ascorbic acid 2-sulfate	LC/MS polar	63590		HMDB0060649	54676864		0.95		0.2036	0.3812		1.1407	1.0628	0.9525		100	100		Cofactors and Vitamins	Ascorbate and Aldarate Metabolism	100009329		3042	254.982
	4346			ascorbic acid 3-sulfate*	LC/MS polar	63687			11425365		0.91		0.0907	0.2718		1.203	0.9976	0.9084		100	100		Cofactors and Vitamins	Ascorbate and Aldarate Metabolism	100020409		2025	254.981
	4349			2-O-methylascorbic acid	LC/MS polar	63990		HMDB0240294	54726398		0.98		0.3946	0.4958		1.0887	1.0493	0.978		100	100		Cofactors and Vitamins	Ascorbate and Aldarate Metabolism	100003258	17860-87-6	1512	189.04
	4350			threonate	LC/MS polar	27738	C01620	HMDB0000943 HMDB0062620	5460407;151152		0.96		0.1877	0.3708		1.0451	0.9242	0.9619		100	100		Cofactors and Vitamins	Ascorbate and Aldarate Metabolism	100001022	70753-61-6	2384	135.03
	4353			oxalate (ethanedioate)	LC/MS neg	20694	C00209	HMDB0002329	971		0.94		0.1849	0.3684		1.0715	0.9668	0.9441		100	100		Cofactors and Vitamins	Ascorbate and Aldarate Metabolism	100000841	144-62-7	603	88.988
	4354			gulonate*	LC/MS polar	46957	C00800	HMDB0003290	152304		1.1		0.0483	0.2151		1.0026	1.0799	1.0962		100	100		Cofactors and Vitamins	Ascorbate and Aldarate Metabolism	100001586	20246-53-1	2750	195.051
	4356		Tocopherol Metabolism	alpha-CMBHC glucuronide	LC/MS neg	63926					0.99		0.1919	0.371		1.0228	0.8894	0.9911		94	72		Cofactors and Vitamins	Tocopherol Metabolism	100005977		3664	495.224
	4357			alpha-tocopherol	LC/MS pos late	1561	C02477	HMDB0001893	86472		1.02		0.5828	0.583		1.0219	1.035	1.0211		100	100		Cofactors and Vitamins	Tocopherol Metabolism	1105	59-02-9;10191-41-0	2522	430.378
	4365			gamma-CEHC	LC/MS neg	44876		HMDB0001931	133098		1.18		0.5354	0.5607		1.1954	1.2552	1.1808		100	100		Cofactors and Vitamins	Tocopherol Metabolism	100002094	178167-75-4	3843	263.129
	4366			gamma-CEHC glucuronide*	LC/MS neg	42381			121596235		1.2		0.6292	0.5994		1.3143	1.4462	1.1978		94	100		Cofactors and Vitamins	Tocopherol Metabolism	100004243		2500	439.161
	4367			alpha-CEHC glucuronide*	LC/MS neg	39346		HMDB0062445	134819285		1.05		0.5684	0.5776		1.072	0.9476	1.0529		61	56		Cofactors and Vitamins	Tocopherol Metabolism	100003101	477200-36-5	2616	453.177
	4368			alpha-CEHC sulfate	LC/MS neg	47666					1.17		0.3119	0.4545		1.3817	1.0497	1.1718		78	72		Cofactors and Vitamins	Tocopherol Metabolism	100005972		3090	357.101
	4373			delta-CEHC	LC/MS neg	62287			35027084		1.43		0.2123	0.3857		1.0401	1.3191	1.429		94	94		Cofactors and Vitamins	Tocopherol Metabolism	100020416	84599-16-6	3422	249.113
	4374			delta-CEHC glucuronide	LC/MS neg	62286					1.64		0.5871	0.5835		0.9444	1.2063	1.636		78	83		Cofactors and Vitamins	Tocopherol Metabolism	100020483		2116	425.145
	4379			gamma-tocopherol/beta-tocopherol	LC/MS pos late	52473	C14152 C02483	HMDB0006335 HMDB0001492			1.21		0.0761	0.2527		1.0049	1.1791	1.206		100	100		Cofactors and Vitamins	Tocopherol Metabolism	100008998		2384	416.364
	4404		Hemoglobin and Porphyrin Metabolism	heme	LC/MS pos late	41754	C00032	HMDB0003178	26945		2.04		0.1106	0.2914		0.753	1.3213	2.0379		72	78		Cofactors and Vitamins	Hemoglobin and Porphyrin Metabolism	100001386	14875-96-8	1124	616.177
	4405			bilirubin (Z,Z)	LC/MS pos late	43807	C00486	HMDB0000054	5280352		0.83		0.0063	0.1182		1.2256	0.9681	0.831		100	100		Cofactors and Vitamins	Hemoglobin and Porphyrin Metabolism	1090	635-65-4	1840	585.271
	4406			bilirubin (E,E)*	LC/MS neg	32586			129320511		0.63		0.0001	0.0117		1.5572	0.8911	0.626		100	100		Cofactors and Vitamins	Hemoglobin and Porphyrin Metabolism	100001950		4294	583.256
	4407			bilirubin (E,Z or Z,E)*	LC/MS pos late	47886	C00486	HMDB0000488	5799469		0.81		0.0034	0.1067		1.2116	0.9495	0.8094		100	100		Cofactors and Vitamins	Hemoglobin and Porphyrin Metabolism	100001951		1265	585.271
	4408			biliverdin	LC/MS pos late	2137	C00500	HMDB0001008	5280353		0.78		0.0043	0.1067		1.3264	0.9672	0.776		100	100		Cofactors and Vitamins	Hemoglobin and Porphyrin Metabolism	250	55482-27-4;55482-27-4	1016	583.255
	4409			I-urobilinogen	LC/MS neg	32426	C05789	HMDB0004157	9548718		1.68		0.5156	0.55		2.3746	5.095	1.6805		72	78		Cofactors and Vitamins	Hemoglobin and Porphyrin Metabolism	100001226	14684-37-8	4190	591.319
	4411			L-urobilin	LC/MS pos late	40173	C05793	HMDB0004159	5280818		0.67		0.0049	0.1067		1.0237	0.4311	0.6652		61	28		Cofactors and Vitamins	Hemoglobin and Porphyrin Metabolism	100002568	34217-90-8	901	595.349
	4426		Vitamin A Metabolism	retinol (Vitamin A)	LC/MS pos late	1806	C00473	HMDB0000305	445354		1.02		0.5221	0.5525		0.9923	1.0031	1.0204		100	100		Cofactors and Vitamins	Vitamin A Metabolism	498	68-26-8	1636	269.226
	4428			carotene diol (1)	LC/MS pos late	57635					1.02		0.9516	0.694		1.0951	1.1219	1.0164		100	100		Cofactors and Vitamins	Vitamin A Metabolism	100015966		1720	568.428
	4429			carotene diol (2)	LC/MS pos late	57636					0.9		0.063	0.2321		1.3146	1.0696	0.8993		100	100		Cofactors and Vitamins	Vitamin A Metabolism	100015967		1904	568.428
	4430			carotene diol (3)	LC/MS pos late	57637					1.2		0.2483	0.4134		1.0536	1.1908	1.1994		100	100		Cofactors and Vitamins	Vitamin A Metabolism	100015968		1948	568.428
	4432			beta-cryptoxanthin	LC/MS pos late	57591	C08591	HMDB0033844	5281235		1.52		0.4643	0.526		1.4005	1.6549	1.5208		100	100		Cofactors and Vitamins	Vitamin A Metabolism	100001977	472-70-8	2560	552.433
	4434			retinal	LC/MS pos late	40807	C00376	HMDB0001358	638015		1.05		0.9069	0.6851		1.0338	1.0427	1.0458		100	100		Cofactors and Vitamins	Vitamin A Metabolism	100004088		1666	285.221
	4448		Vitamin B6 Metabolism	pyridoxate	LC/MS neg	31555	C00847	HMDB0000017	6723		1.9		0.7622	0.6442		2.7114	5.5269	1.9029		100	100		Cofactors and Vitamins	Vitamin B6 Metabolism	100001121	82-82-6	2185	182.046
	4459	Xenobiotics	Benzoate Metabolism	hippurate	LC/MS neg	15753	C01586	HMDB0000714	464		1.84		0.4772	0.5291		1.0543	1.3165	1.8362		100	100		Xenobiotics	Benzoate Metabolism	100000014	495-69-2	2106.9	178.051
	4463			2-hydroxyhippurate (salicylurate)	LC/MS neg	18281	C07588	HMDB0000840	10253		37.05		0.0922	0.2728		8.662	18.2555	37.048		100	100		Xenobiotics	Benzoate Metabolism	1869	487-54-7	2184	194.046
	4465			3-hydroxyhippurate	LC/MS neg	39600		HMDB0006116	450268		3.83		0.0213	0.1712		1.3617	3.0592	3.8296		100	100		Xenobiotics	Benzoate Metabolism	100002122	1637-75-8	1687	194.046
	4466			3-hydroxyhippurate sulfate	LC/MS neg	62530			186339		2.79		0.0384	0.2035		0.6483	1.6311	2.7921		67	83		Xenobiotics	Benzoate Metabolism	100020410		1047	274.003
	4467			4-hydroxyhippurate	LC/MS neg	35527		HMDB0013678	151012		1.52		0.3688	0.4787		1.0377	1.225	1.5156		100	100		Xenobiotics	Benzoate Metabolism	100001423	2482-25-9	1475	194.046
	4473			benzoate	LC/MS neg	15778	C00180	HMDB0001870	243		1.11		0.6624	0.6084		1.04	1.0276	1.1092		100	100		Xenobiotics	Benzoate Metabolism	100000008	65-85-0	1750	121.029
	4495			catechol sulfate	LC/MS neg	35320		HMDB0059724	3083879		1.79		0.0418	0.2077		1.0852	1.4324	1.7889		100	100		Xenobiotics	Benzoate Metabolism	100001605	4918-96-1	1906	188.986
	4497			4-methylguaiacol sulfate	LC/MS neg	48418					1.4		0.4561	0.5226		2.1737	4.0227	1.4034		100	100		Xenobiotics	Benzoate Metabolism	100006105	756760-43-7	2978	217.018
	4498			guaiacol sulfate	LC/MS neg	46111		HMDB0060013	22473		2		0.0122	0.1439		0.8325	1.1926	1.9953		100	100		Xenobiotics	Benzoate Metabolism	100004208		2344	203.002
	4499			3-methyl catechol sulfate (1)	LC/MS neg	46165			118431379		4.07		0.0191	0.1648		1.0726	1.5027	4.0678		100	100		Xenobiotics	Benzoate Metabolism	100004112		2790	203.002
	4500			3-methyl catechol sulfate (2)	LC/MS neg	46164					8.54		0.032	0.1946		1.0152	1.5302	8.5401		78	94		Xenobiotics	Benzoate Metabolism	100004110		2860	203.002
	4501			4-ethylcatechol sulfate	LC/MS neg	63072					5.03		0.0356	0.1977		1.3115	2.0662	5.0333		100	100		Xenobiotics	Benzoate Metabolism	100020536		3379	217.018
	4502			4-methylcatechol sulfate	LC/MS neg	46146		HMDB0240459	54104170		1.22		0.5768	0.5801		1.2485	1.4614	1.22		100	100		Xenobiotics	Benzoate Metabolism	100004111		2665	203.002
	4503			4-allylcatechol sulfate	LC/MS neg	63597					2.08		0.7698	0.6453		2.4003	2.1129	2.084		100	100		Xenobiotics	Benzoate Metabolism	100020578		3571	229.018
	4510			methyl-4-hydroxybenzoate	LC/MS neg	34386	D01400	HMDB0032572	7456		2.4		0.1222	0.302		30.3338	0.2247	2.3976		39	33		Xenobiotics	Benzoate Metabolism	100001252	99-76-3	3671	151.04
	4514			4-acetylphenol sulfate	LC/MS neg	44620			4684006		2.11		0.0494	0.2161		1.1871	1.7507	2.1123		100	100		Xenobiotics	Benzoate Metabolism	100000711		2375	215.002
	4517			2-ethylphenylsulfate	LC/MS neg	36847					1.41		0.5197	0.5517		2.0993	0.9365	1.4052		44	67		Xenobiotics	Benzoate Metabolism	100001809		3416	201.023
	4520			4-ethylphenylsulfate	LC/MS neg	36099	C13637	HMDB0062551	20822574		1.84		0.0566	0.2277		1.7711	3.5148	1.8389		100	100		Xenobiotics	Benzoate Metabolism	100001756	123-07-9	3580	201.023
	4522			4-vinylphenol sulfate	LC/MS neg	36098	C05627	HMDB0062775	6426766		2.43		0.3048	0.4525		1.205	1.8828	2.4287		100	100		Xenobiotics	Benzoate Metabolism	100001755	2628-17-3	3320	199.007
	4527			4-vinylcatechol sulfate	LC/MS neg	64579					4.56		0.02	0.1648		5.4406	7.5105	4.5627		100	100		Xenobiotics	Benzoate Metabolism	100021208		3060	215.002
	4538			3-methoxycatechol sulfate (1)	LC/MS neg	48763			129892430		4		0.1535	0.3304		1.4112	1.1683	4.0029		100	100		Xenobiotics	Benzoate Metabolism	100006375		2163	218.997
	4539			3-methoxycatechol sulfate (2)	LC/MS neg	48752					2.32		0.0314	0.1946		0.8967	1.5766	2.3199		100	100		Xenobiotics	Benzoate Metabolism	100006376		2200	218.997
	4541			methyl-4-hydroxybenzoate sulfate	LC/MS neg	48429		HMDB0041646	10657183		5.83		0.7254	0.6336		2.5379	1.6923	5.8282		100	100		Xenobiotics	Benzoate Metabolism	100006116		2873	230.997
	4543			propyl 4-hydroxybenzoate sulfate	LC/MS neg	48460		HMDB0135261	131838881		10.73		0.774	0.6463		1.6422	2.6191	10.7295		78	94		Xenobiotics	Benzoate Metabolism	100006264	162338-10-5	3971	259.028
	4549			p-cresol sulfate	LC/MS neg	36103		HMDB0011635	4615423		1.03		0.2714	0.4267		1.2249	1.0948	1.0288		100	100		Xenobiotics	Benzoate Metabolism	100001315	3233-57-7	2890	187.007
	4556			o-cresol sulfate	LC/MS neg	36845		HMDB0011635	11615528		3.11		0.4418	0.5187		1.512	1.5317	3.1099		100	100		Xenobiotics	Benzoate Metabolism	100001806		2796	187.007
	4565			3-(3-hydroxyphenyl)propionate sulfate	LC/MS neg	45415		HMDB0094710	187488		2.48		0.0808	0.2569		0.8015	1.8478	2.4821		67	72		Xenobiotics	Benzoate Metabolism	100005391	86321-32-6	1294	245.013
	4568			3-(3-hydroxyphenyl)propionate	LC/MS neg	35635	C11457	HMDB0000375	91		4.94		0.0084	0.1335		0.8473	2.2854	4.9416		72	83		Xenobiotics	Benzoate Metabolism	100001624	621-54-5	1980	165.056
	4570			3-(4-hydroxyphenyl)propionate	LC/MS neg	39587	C01744	HMDB0002199	10394		1.88		0.2789	0.4324		0.7419	1.0885	1.8771		44	50		Xenobiotics	Benzoate Metabolism	100002914	501-97-3	1670	165.056
	4571			3-phenylpropionate (hydrocinnamate)	LC/MS neg	15749	C05629	HMDB0000764	107		1.21		0.7499	0.6404		1.0705	1.1217	1.2064		100	89		Xenobiotics	Benzoate Metabolism	100000010	501-52-0	2860	149.061
	4581			2-methoxyhydroquinone sulfate (1)	LC/MS neg	64049					8.64		0.003	0.1067		0.7277	1.7036	8.6383		94	100		Xenobiotics	Benzoate Metabolism	100021839		1505	218.997
	4582			2-methoxyhydroquinone sulfate (2)	LC/MS neg	64050					4.69		0.0016	0.082		0.7306	1.5698	4.69		78	100		Xenobiotics	Benzoate Metabolism	100021840		1619	218.997
	4587		Xanthine Metabolism	caffeine	LC/MS pos early	569	C07481	HMDB0001847	2519		10.49		0.0049	0.1067		0.6664	1.3816	10.4927		100	100		Xenobiotics	Xanthine Metabolism	849	58-08-2	2106	195.088
	4588			paraxanthine	LC/MS neg	18254	C13747	HMDB0001860	4687		3.35		0.014	0.1501		0.8383	1.5817	3.3505		100	100		Xenobiotics	Xanthine Metabolism	100000453	611-59-6	2279	179.057
	4589			theobromine	LC/MS pos early	18392	C07480	HMDB0002825	5429		2.98		0.0761	0.2527		1.0377	1.5982	2.9775		100	100		Xenobiotics	Xanthine Metabolism	100000445	83-67-0	1600	181.072
	4590			theophylline	LC/MS neg	18394	C07130	HMDB0001889	2153		1.9		0.0065	0.1182		0.8075	1.2657	1.9002		100	100		Xenobiotics	Xanthine Metabolism	100000437	58-55-9	2356.9	179.057
	4591			1-methylurate	LC/MS polar	34395	C16359	HMDB0003099	69726		1.75		0.115	0.2976		0.9855	1.4484	1.7452		100	100		Xenobiotics	Xanthine Metabolism	100001400	708-79-2	1900	181.037
	4593			1,3-dimethylurate	LC/MS neg	32391		HMDB0001857	70346		1.53		0.4267	0.5107		1.0258	1.2857	1.5323		89	94		Xenobiotics	Xanthine Metabolism	100001106	944-73-0	1671.4	195.052
	4594			1,7-dimethylurate	LC/MS neg	34400	C16356	HMDB0011103	91611		1.94		0.0283	0.1832		0.8106	1.2347	1.939		100	100		Xenobiotics	Xanthine Metabolism	100001399	33868-03-0	1578.6	195.052
	4595			3,7-dimethylurate	LC/MS neg	34399	C16360	HMDB0001982	83126		1.61		0.5037	0.5442		0.8117	1.0821	1.6062		72	78		Xenobiotics	Xanthine Metabolism	100001398	13087-49-5	1418	195.052
	4596			1,3,7-trimethylurate	LC/MS neg	34404	C16361	HMDB0002123	79437		7.02		0.006	0.1159		0.786	1.5293	7.0186		100	100		Xenobiotics	Xanthine Metabolism	100001397	5415-44-1	1985	209.068
	4597			1-methylxanthine	LC/MS neg	34389	C16358	HMDB0010738	80220		1.87		0.122	0.302		1.1291	1.681	1.8723		100	100		Xenobiotics	Xanthine Metabolism	100001405	6136-37-4	1568.8	165.042
	4598			3-methylxanthine	LC/MS neg	32445	C16357	HMDB0001886	70639		2.49		0.2048	0.3812		1.146	1.5577	2.49		100	100		Xenobiotics	Xanthine Metabolism	100001108	1076-22-8	1700	165.042
	4599			7-methylxanthine	LC/MS pos early	34390	C16353	HMDB0001991	68374		2.55		0.27	0.4259		1.1639	1.583	2.5513		100	100		Xenobiotics	Xanthine Metabolism	100001396	552-62-5	1350	167.056
	4600			5-acetylamino-6-amino-3-methyluracil	LC/MS polar	34424	C16366	HMDB0004400	88299		1.37		0.167	0.3498		1.1324	1.3994	1.3743		100	100		Xenobiotics	Xanthine Metabolism	100001403	1196153-01-1	1710	197.068
	4601			5-acetylamino-6-formylamino-3-methyluracil	LC/MS polar	34401	C16365	HMDB0011105	108214		1.7		0.0629	0.2321		1.1228	1.5887	1.6963		100	100		Xenobiotics	Xanthine Metabolism	100001402	85438-96-6	1424	225.063
	4607		Tobacco Metabolite	cotinine	LC/MS pos early	553		HMDB0001046	408		0.9		0.1153	0.2976		0.1978	0.1266	0.9013		22	11		Xenobiotics	Tobacco Metabolite	848	486-56-6	2213	177.102
	4609			cotinine N-oxide	LC/MS pos early	38662		HMDB0001411	9815514		1.02		0.8768	0.6769		0.8264	0.8363	1.0175		17	6		Xenobiotics	Tobacco Metabolite	100002719	36508-80-2	1377	193.097
	4621			2-hydroxyfluorene sulfate	LC/MS neg	62528					1.04		0.1234	0.3026		1.6278	1.0538	1.0435		78	61		Xenobiotics	Tobacco Metabolite	100020585		4372	261.023
	4627		Food Component/Plant	ethyl maltol sulfate	LC/MS neg	62314					1					1	1	1		0	6		Xenobiotics	Food Component/Plant	100006255		2010	218.997
	4633			2-piperidinone	LC/MS pos early	43400		HMDB0011749	12665		1.11		0.3536	0.4719		1.8836	1.6802	1.1064		100	100		Xenobiotics	Food Component/Plant	100004295	675-20-7	1675	100.076
	4679			sucralose	LC/MS neg	36649	C12285	HMDB0031554	71485		1.22		0.6456	0.6031		1.3753	0.5966	1.2168		28	28		Xenobiotics	Food Component/Plant	100001789	56038-13-2	3140	395.007
	4713			ginkgolic acid C15:1	LC/MS polar	64200	C10794		5281858		1.56		0.2094	0.3825		0.4397	0.6849	1.5576		6	11		Xenobiotics	Food Component/Plant	100021252	22910-60-7	677	345.244
	4769			2,3-dihydroxyisovalerate	LC/MS polar	38276	C04039	HMDB0012141	677		2.78		0.2122	0.3857		1.5304	1.8413	2.7779		100	100		Xenobiotics	Food Component/Plant	100002417	1756-18-9	1050	133.051
	4770			2,3-dihydroxypyridine	LC/MS pos early	21132			28115		3.79		0.0426	0.2077		0.7356	1.1965	3.7858		56	89		Xenobiotics	Food Component/Plant	100000861	16867-04-2	1420	112.039
	4774			2,8-quinolinediol sulfate	LC/MS neg	48691					1.55		0.5767	0.5801		1.3233	1.3802	1.5501		78	83		Xenobiotics	Food Component/Plant	100004321		2612	239.997
	4777			2-isopropylmalate	LC/MS polar	15667	C02504	HMDB0000402	77		7.2		0.4127	0.5036		1.6045	2.4857	7.203		78	94		Xenobiotics	Food Component/Plant	100000409	3237-44-3	2605	175.061
	4778			2-oxindole-3-acetate	LC/MS pos early	40479		HMDB0035514	3080590		1.62		0.4061	0.5001		1.6489	1.8152	1.6163		72	72		Xenobiotics	Food Component/Plant	100003109	2971-31-5	2378	192.066
	4782			3-formylindole	LC/MS polar	62863	C08493	HMDB29737	10256		1.18		0.0371	0.2012		1.0092	1.1507	1.1754		100	100		Xenobiotics	Food Component/Plant	100020219	487-89-8	782	144.045
	4790			3-hydroxyindolin-2-one sulfate	LC/MS neg	48419					1.12		0.8061	0.6529		1.0955	1.2253	1.1198		89	89		Xenobiotics	Food Component/Plant	100006103		2082	227.997
	4802			gluconate	LC/MS polar	587	C00257	HMDB0000625	3085666;10690		0.96		0.2352	0.4042		1.1244	1.0479	0.9605		100	100		Xenobiotics	Food Component/Plant	338	527-07-1	2922	195.051
	4809			4-acetylcatechol sulfate (1)	LC/MS neg	62798					4.33		0.0111	0.1439		1.0021	2.0491	4.3339		100	94		Xenobiotics	Food Component/Plant	100020853		1774	230.997
	4813			alliin	LC/MS pos early	41494	C08265	HMDB0033592	87310		2.34		0.6236	0.5994		1.2049	2.909	2.3354		72	83		Xenobiotics	Food Component/Plant	100003473	556-27-4	1470	178.053
	4814			N-acetylalliin	LC/MS pos early	45404					2.32		0.4	0.4959		1.3678	1.5083	2.3197		78	78		Xenobiotics	Food Component/Plant	100005367		1348	220.064
	4831			dihydrocaffeate sulfate (2)	LC/MS polar	62524					11.27		0.014	0.1501		0.8539	2.2489	11.2745		83	94		Xenobiotics	Food Component/Plant	100020822		1328	261.007
	4850			cinnamoylglycine	LC/MS neg	38637		HMDB0011621	709625		1.15		0.2648	0.4237		2.0592	1.5982	1.148		100	94		Xenobiotics	Food Component/Plant	100002253	16534-24-0	3127	204.067
	4876			dihydroferulate	LC/MS neg	40481		HMDB0062121	14340		5.73		0.0048	0.1067		1.1361	2.4665	5.7293		67	94		Xenobiotics	Food Component/Plant	100003432	1135-23-5	1928	195.066
	4877			dihydroferulic acid sulfate	LC/MS neg	62857		HMDB0041724	187489		5.84		0.0236	0.1753		0.9696	1.4843	5.8447		56	94		Xenobiotics	Food Component/Plant	100020272		1310	275.023
	4890			ergothioneine	LC/MS pos early	37459	C05570	HMDB0003045	5351619		0.96		0.2618	0.4236		2.0745	1.6136	0.9645		100	100		Xenobiotics	Food Component/Plant	100002154	58511-63-0	850	230.096
	4892			erythritol	LC/MS polar	20699	C00503	HMDB0002994	222285		1.58		0.1731	0.3547		0.992	1.4683	1.5784		100	100		Xenobiotics	Food Component/Plant	100000846	149-32-6	1491	167.056
	4894			3-ethylcatechol sulfate (1)	LC/MS neg	62796					1.96		0.1534	0.3304		1.3418	1.3947	1.9615		100	100		Xenobiotics	Food Component/Plant	100020851		3422	217.018
	4895			3-ethylcatechol sulfate (2)	LC/MS neg	62797					4.27		0.1442	0.3209		0.8437	0.9787	4.2714		61	89		Xenobiotics	Food Component/Plant	100020852		3555	217.018
	4898			ferulic acid 4-sulfate	LC/MS neg	47114		HMDB0029200	6305574		11.03		0.0123	0.1439		1.2886	1.6496	11.0306		78	100		Xenobiotics	Food Component/Plant	100005389	86321-29-1	1200	273.007
	4902			quinate	LC/MS polar	18335	C00296	HMDB0003072	6508		2.76		0.0235	0.1753		0.883	1.348	2.7556		100	100		Xenobiotics	Food Component/Plant	100000442	77-95-2	2432.9	191.056
	4903			feruloylquinate (1)	LC/MS neg	63399					6.23		0.0361	0.1982		0.6068	1.8881	6.2345		50	72		Xenobiotics	Food Component/Plant	100021485		2166	367.103
	4904			feruloylquinate (2)	LC/MS neg	63400					9.24		0.0453	0.2112		0.7996	2.2439	9.2399		50	78		Xenobiotics	Food Component/Plant	100021486		2229	367.103
	4906			feruloylquinate (4)	LC/MS neg	63402					9.6		0.0387	0.2038		0.9189	2.1985	9.5968		56	83		Xenobiotics	Food Component/Plant	100021488		2546	367.103
	4907			feruloylquinate (5)	LC/MS neg	63403	C02572	HMDB0030669	9799386		5.61		0.077	0.2527		0.4994	1.2935	5.6064		39	61		Xenobiotics	Food Component/Plant	100021489		2655	367.103
	4918			glucoheptose	LC/MS polar	20705			76599		0.93		0.2554	0.42		2.1146	0.8982	0.9274		28	17		Xenobiotics	Food Component/Plant	100000852	62475-58-5	2573	209.067
	4930			homostachydrine*	LC/MS pos early	33009	C08283	HMDB0033433	441447		1.32		0.6482	0.6031		1.1819	1.0675	1.3155		100	100		Xenobiotics	Food Component/Plant	100001550	1195-94-4	1750	158.118
	4956			mannonate*	LC/MS polar	62864			3246006		0.96		0.2032	0.3812		1.0552	0.9739	0.9561		100	100		Xenobiotics	Food Component/Plant	100003695	642-99-9	2736	195.051
	4960			methyl indole-3-acetate	LC/MS pos early	1584		HMDB0029738	74706		1.06		0.2453	0.4134		1.1475	1.0747	1.0556		94	94		Xenobiotics	Food Component/Plant	1104	1912-33-0	3380	190.086
	4964			N-(2-furoyl)glycine	LC/MS neg	31536		HMDB0000439	21863		18.69		0.0035	0.1067		1.29	3.1715	18.6931		100	100		Xenobiotics	Food Component/Plant	100001086	5657-19-2;5657-19-2	1525	168.03
	4966			N-oxalyl glycine (NOG)	LC/MS polar	57776			3080614		1.35		0.1295	0.3065		1.033	1.2145	1.3514		100	100		Xenobiotics	Food Component/Plant	100015923		3292	146.009
	4996			phytanate	LC/MS neg	598	C01607	HMDB0000801	26840		1.82		0.1046	0.283		1.0073	1.6949	1.8206		100	100		Xenobiotics	Food Component/Plant	466	14721-66-5	5908	311.296
	5002			piperine	LC/MS pos late	33935	C03882	HMDB0029377	638024		1.76		0.2973	0.4459		1.487	1.3844	1.762		100	100		Xenobiotics	Food Component/Plant	100001267	94-62-2	1168	286.144
	5005			glucuronide of piperine metabolite C17H21NO3 (3)*	LC/MS neg	62290					1.49		0.3684	0.4787		0.9631	1.2729	1.4858		100	94		Xenobiotics	Food Component/Plant	100020491		3951	462.177
	5006			glucuronide of piperine metabolite C17H21NO3 (4)*	LC/MS neg	62291					1.47		0.841	0.6653		1.0505	1.3228	1.4687		100	100		Xenobiotics	Food Component/Plant	100020492		3992	462.177
	5007			glucuronide of piperine metabolite C17H21NO3 (5)*	LC/MS neg	62292					1.35		0.7807	0.6468		1.098	1.3303	1.3509		100	94		Xenobiotics	Food Component/Plant	100020493		4039	462.177
	5014			sulfate of piperine metabolite C16H19NO3 (2)*	LC/MS neg	62295					1.5		0.4951	0.537		1.0573	1.1463	1.5004		100	100		Xenobiotics	Food Component/Plant	100020496		4112	352.086
	5015			sulfate of piperine metabolite C16H19NO3 (3)*	LC/MS neg	62296					1.5		0.475	0.5291		1.0977	1.1572	1.5028		100	100		Xenobiotics	Food Component/Plant	100020497		4200	352.086
	5020			sulfate of piperine metabolite C18H21NO3 (1)*	LC/MS neg	62297					1.41		0.9152	0.6851		0.9564	1.1226	1.4069		100	94		Xenobiotics	Food Component/Plant	100020502		4481	378.102
	5022			sulfate of piperine metabolite C18H21NO3 (3)*	LC/MS neg	62299					1.23		0.8067	0.6529		0.9833	1.0061	1.2273		100	89		Xenobiotics	Food Component/Plant	100020504		4630	378.102
	5038			saccharin	LC/MS neg	21151	C12283	HMDB0029723	5143		18.6		0.1286	0.3065		2.5535	30.482	18.6038		67	67		Xenobiotics	Food Component/Plant	100000870	81-07-2	2000	181.992
	5040			acesulfame	LC/MS neg	48569		HMDB0033585	36573		22.36		0.7587	0.6432		2.6039	0.8906	22.357		39	33		Xenobiotics	Food Component/Plant	100006203	55589-62-3	1581	161.987
	5041			S-allylcysteine	LC/MS pos early	43239		HMDB0034323	98280		2.31		0.3365	0.4613		1.5776	1.7691	2.3092		100	100		Xenobiotics	Food Component/Plant	100004509	21593-77-1	2690	162.058
	5060			stachydrine	LC/MS pos early	34384	C10172	HMDB0004827	115244		4.19		0.1823	0.3655		1.2519	1.8002	4.1904		100	100		Xenobiotics	Food Component/Plant	100001296	4136-37-2	1440	144.102
	5070			tartarate	LC/MS neg	15336	C00552 C00898 C02107	HMDB0062642 HMDB0000956	444305;875		5.22		0.3996	0.4959		1.5303	2.7336	5.2163		56	72		Xenobiotics	Food Component/Plant	100000295	87-69-4;6106-24-7	615.3	149.009
	5071			theanine	LC/MS pos early	22206	C01047	HMDB0034365	439378		1.03		0.8389	0.6645		0.4647	0.4574	1.029		11	17		Xenobiotics	Food Component/Plant	100000784	3081-61-6	2180	175.108
	5072			N-acetyltheanine	LC/MS neg	62711					1.17		0.8232	0.6599		0.6711	0.6924	1.1666		11	17		Xenobiotics	Food Component/Plant	100020514		1496	215.104
	5074			thymol sulfate	LC/MS neg	36095	C09908	HMDB0062720	12456386		2.06		0.4571	0.5226		10.0628	5.2953	2.0578		100	100		Xenobiotics	Food Component/Plant	100001757	89-83-8	4410	229.054
	5085			4-allylphenol sulfate	LC/MS neg	37181			66633409		1.38		0.4151	0.5052		1.3023	1.2057	1.3814		100	100		Xenobiotics	Food Component/Plant	100001868		3805	213.023
	5086			ethyl alpha-glucopyranoside	LC/MS neg	63152		HMDB0029968	11127487		2.9		0.2707	0.4262		1.7068	3.8411	2.9041		100	100		Xenobiotics	Food Component/Plant	100015965	34625-23-5	1576	207.087
	5087			methyl glucopyranoside (alpha + beta)	LC/MS neg	46144		HMDB0029965	445238;3036743;2108		1.32		0.8019	0.6501		1.6273	1.5066	1.3151		100	100		Xenobiotics	Food Component/Plant	100005864		1070	193.072
	5113			4-vinylguaiacol sulfate	LC/MS neg	48442		HMDB0127980	53803570		10.39		0.0528	0.2238		1.746	1.9011	10.3877		94	100		Xenobiotics	Food Component/Plant	100006126		3354	229.018
	5114			pyrraline	LC/MS neg	48428	C21013	HMDB0033143	14274616		1.94		0.1599	0.3418		1.3787	1.4459	1.9439		100	100		Xenobiotics	Food Component/Plant	100001767	74509-14-1	2304	253.119
	5116			umbelliferone sulfate	LC/MS neg	48674		HMDB0240565	129659		18.68		0.3747	0.4819		4.8617	6.1176	18.6764		100	100		Xenobiotics	Food Component/Plant	100006282	69526-88-1	2440	240.981
	5119			eugenol sulfate	LC/MS neg	48715		HMDB0135245	180632		4.62		0.493	0.5363		8.4731	2.13	4.6219		100	89		Xenobiotics	Food Component/Plant	100006171	95480-60-7	3782	243.033
	5126			2-keto-3-deoxy-gluconate	LC/MS polar	48141	C00204	HMDB0001353	161227		1.03		0.9473	0.6926		1.1208	1.1593	1.0336		100	100		Xenobiotics	Food Component/Plant	100005946	17510-99-5	1900	177.04
	5128			isoeugenol sulfate	LC/MS neg	48997			122198202		1.22		0.259	0.4221		1.5373	0.8013	1.2152		78	78		Xenobiotics	Food Component/Plant	100006089		3893	243.033
	5137			syringol sulfate	LC/MS neg	48454					2.3		0.9987	0.7032		3.8092	2.6317	2.3024		56	72		Xenobiotics	Food Component/Plant	100006256	52904-67-3	2395	233.013
	5148			trans-3,4-methyleneheptanoate	LC/MS neg	53026					1.12		0.4314	0.5123		1.1239	1.1005	1.1246		94	94		Xenobiotics	Food Component/Plant	100006651		3807	141.092
	5199			(2,4 or 2,5)-dimethylphenol sulfate	LC/MS neg	62533					1.76		0.9106	0.6851		3.1994	1.6886	1.7625		94	94		Xenobiotics	Food Component/Plant	100020519		3474	201.023
	5200			caffeic acid sulfate	LC/MS polar	53254		HMDB0041708	21668705		20.47		0.018	0.1648		1.5306	1.6847	20.4659		89	100		Xenobiotics	Food Component/Plant	100009337		1307	258.992
	5203			tartronate (hydroxymalonate)	LC/MS neg	20693	C02287	HMDB0035227	45		1.08		0.3718	0.4796		0.9944	0.9052	1.081		100	100		Xenobiotics	Food Component/Plant	100000840	80-69-3	610	118.999
	5211			3-indoleglyoxylic acid	LC/MS neg	63583			73863		1.36		0.0331	0.1948		0.9056	1.093	1.3562		94	100		Xenobiotics	Food Component/Plant	100020372	1477-49-2	2140	188.035
	5213			methyl vanillate sulfate	LC/MS neg	63857					5.04		0.1514	0.33		0.8601	1.723	5.0412		72	83		Xenobiotics	Food Component/Plant	100020622		2933	261.007
	5215			vanillic acid glycine	LC/MS neg	63853		HMDB0060026	3083688		5.68		0.0341	0.1948		1.3752	4.1843	5.6753		100	100		Xenobiotics	Food Component/Plant	100021363		1682	224.056
	5221			ethyl beta-glucopyranoside	LC/MS neg	64131		HMDB0029968	121667		1.88		0.2675	0.4244		1.6284	1.495	1.885		100	100		Xenobiotics	Food Component/Plant	100020377		1519	207.087
	5246			2-acetamidophenol sulfate	LC/MS neg	48580			181671		3.74		0.288	0.4402		1.0736	3.1498	3.7359		89	94		Xenobiotics	Food Component/Plant	100006190	40712-60-5	2251	230.013
	5247			2-aminophenol sulfate	LC/MS neg	43266		HMDB0061116	181670		2.66		0.1418	0.3185		1.2616	2.6267	2.6616		100	100		Xenobiotics	Food Component/Plant	100004322		1677	188.002
	5294		Bacterial/Fungal	lactobacillic acid	LC/MS neg	63048			656761		1.78		0.9699	0.6967		1.2243	1.3996	1.7799		100	100		Xenobiotics	Bacterial/Fungal	100021065	503-06-0	5822	295.264
	5324			1H-indole-7-acetic acid	LC/MS neg	57783			18356439		1.11		0.7076	0.6265		0.707	0.7265	1.1052		56	61		Xenobiotics	Bacterial/Fungal	100004601	39689-63-9	2862	174.056
	5325			N-methylpipecolate	LC/MS pos early	47101			11286529		1.64		0.4727	0.5283		1.4405	1.3688	1.6356		100	100		Xenobiotics	Bacterial/Fungal	100005383	41447-17-0	1932	144.102
	5371		Drug - Analgesics, Anesthetics	4-acetamidophenol	LC/MS neg	12032	C06804	HMDB0001859	1983		4.82		0.0526	0.2238		0.3	0.543	4.8185		22	56		Xenobiotics	Drug - Analgesics, Anesthetics	1383	103-90-2	2173.7	150.056
	5373			3-(N-acetyl-L-cystein-S-yl) acetaminophen	LC/MS neg	45721			83967		12.61		0.0774	0.2527		0.3035	0.4514	12.6054		33	44		Xenobiotics	Drug - Analgesics, Anesthetics	2048	52372-86-8	2094	311.071
	5374			4-acetaminophen sulfate	LC/MS neg	37475	C06804	HMDB0059911	83939		558.03		0.3821	0.4873		9.2306	15.7699	558.028		78	61		Xenobiotics	Drug - Analgesics, Anesthetics	2049	10066-90-7;32113-41-0	1792	230.013
	5375			4-acetamidophenylglucuronide	LC/MS neg	15736		HMDB0010316	83944;4022661		61.7		0.1008	0.2821		0.3193	0.4862	61.7017		39	44		Xenobiotics	Drug - Analgesics, Anesthetics	100000043	120595-80-4	1400	326.088
	5376			2-hydroxyacetaminophen sulfate*	LC/MS neg	33173		HMDB0062547	86290013		3.8		0.1171	0.2976		0.2955	0.4607	3.8		28	44		Xenobiotics	Drug - Analgesics, Anesthetics	100001791		1674	246.008
	5377			2-methoxyacetaminophen sulfate*	LC/MS neg	47031		HMDB0062550	86290014		18.9		0.0642	0.2348		0.2829	0.5086	18.8987		33	44		Xenobiotics	Drug - Analgesics, Anesthetics	100001793		1949	260.023
	5378			2-methoxyacetaminophen glucuronide*	LC/MS neg	33161		HMDB0240215	121596203		26.73		0.0842	0.2624		0.2597	0.4285	26.7252		39	44		Xenobiotics	Drug - Analgesics, Anesthetics	100001795		1633	356.099
	5379			3-(cystein-S-yl)acetaminophen*	LC/MS pos early	34365		HMDB0240217	171264		1.15		0.3128	0.4549		0.5893	0.6652	1.1513		22	39		Xenobiotics	Drug - Analgesics, Anesthetics	100001797		2420	271.075
	5383			3-(methylthio)acetaminophen sulfate*	LC/MS neg	62567					1.36		0.1654	0.3486		0.5918	0.8303	1.3608		28	39		Xenobiotics	Drug - Analgesics, Anesthetics	100020827		2265	276.001
	5387			naproxen	LC/MS neg	12122	C01517	HMDB0001923	156391		1.09		0.3313	0.4574		0.5653	0.6136	1.0855		6	6		Xenobiotics	Drug - Analgesics, Anesthetics	1384	22204-53-1	4155	229.087
	5389			desmethylnaproxen	LC/MS neg	46331		HMDB0013989	162920		1.06		0.3313	0.4574		0.6471	0.6863	1.0606		6	6		Xenobiotics	Drug - Analgesics, Anesthetics	100001787	52079-10-4	3045	215.071
	5390			desmethylnaproxen sulfate	LC/MS neg	46106			184679		1.05		0.3313	0.4574		0.697	0.7307	1.0483		6	6		Xenobiotics	Drug - Analgesics, Anesthetics	100001788		2250	295.028
	5391			ibuprofen	LC/MS neg	17799	C01588	HMDB0001925	3672		1.88		0.568	0.5776		0.73	0.1703	1.8763		11	11		Xenobiotics	Drug - Analgesics, Anesthetics	1487	15687-27-1	4925	205.123
	5392			2-hydroxyibuprofen	LC/MS neg	43330		HMDB0060920	10443535		5.66		0.6264	0.5994		2.9738	0.5822	5.6604		22	17		Xenobiotics	Drug - Analgesics, Anesthetics	100004169	51146-55-5	3462	221.118
	5394			carboxyibuprofen	LC/MS neg	43333		HMDB0060564	10444113		0.98		0.4229	0.5085		1.1266	0.674	0.9777		11	6		Xenobiotics	Drug - Analgesics, Anesthetics	100004171	15935-54-3	1920	235.098
	5396			ibuprofen acyl glucuronide	LC/MS neg	38366		HMDB0010343	163959		1.5		0.5611	0.5744		0.5882	0.2046	1.5036		11	11		Xenobiotics	Drug - Analgesics, Anesthetics	100002406	115075-59-7	4976	381.155
	5401			salicyluric glucuronide*	LC/MS neg	33384		HMDB0240252	121596205		13.83		0.131	0.3093		1.8567	3.7168	13.8349		83	83		Xenobiotics	Drug - Analgesics, Anesthetics	100001332		1463	370.078
	5414			meloxicam	LC/MS pos late	64093	C08169 D00969	HMDB0014952	54677470		0.95		0.3313	0.4574		0.5279	0.0923	0.9507		11	6		Xenobiotics	Drug - Analgesics, Anesthetics	100020907	71125-38-7	1038	352.042
	5418			lidocaine	LC/MS pos early	35661	D00358	HMDB0014426	3676		0.87		0.0889	0.271		0.3704	0.2106	0.8665		22	0		Xenobiotics	Drug - Analgesics, Anesthetics	100001538	137-58-6	3250	235.18
	5434			O-desmethyltramadol glucuronide	LC/MS neg	52357		HMDB0060856	29919005		1					1	1	1		0	6		Xenobiotics	Drug - Analgesics, Anesthetics	100006383	383891-39-2	2790	424.198
	5493		Drug - Antibiotic	doxycycline	LC/MS neg	39273	D00307	HMDB0014399	54671203		1					1	1	1		0	6		Xenobiotics	Drug - Antibiotic	100003009	24390-14-5	3790	443.146
	5547		Drug - Antiviral	oseltamivir carboxylate (Ro-64-0802/02)	LC/MS neg	40447	D08306 C08092 DG00665	HMDB0014343	65028;449381		1					1	1	1		6	0		Xenobiotics	Drug - Antiviral	100003431	187227-45-8	2925	283.166
	5588		Drug - Antiinflammatory, Immunosuppressant	prednisolone	LC/MS neg	54742	C07369 D00472	HMDB0014998	5755		1					1	1	1		6	0		Xenobiotics	Drug - Antiinflammatory, Immunosuppressant	100009252		4701	359.186
	5638		Drug - Cardiovascular	metoprolol	LC/MS pos early	18037	D02358	HMDB0001932	4171		9.89		0.3477	0.4699		1.7456	2.1855	9.8943		50	83		Xenobiotics	Drug - Cardiovascular	2028	56392-17-7	3312	268.191
	5639			metoprolol acid metabolite*	LC/MS pos early	34109			62936		6.57		0.188	0.3708		1.0469	1.1621	6.5729		72	83		Xenobiotics	Drug - Cardiovascular	100001385	56392-14-4	2950	268.154
	5640			alpha-hydroxymetoprolol	LC/MS pos early	54738		HMDB0060994	114962		2.31		0.4475	0.5189		0.9038	0.9668	2.3059		61	72		Xenobiotics	Drug - Cardiovascular	100006385	56392-16-6	2900	284.186
	5644			atenolol	LC/MS pos early	38658	D00235	HMDB0001924	2249		1					1	1	1		6	0		Xenobiotics	Drug - Cardiovascular	100002726	29122-68-7	2668	267.17
	5646			diltiazem	LC/MS pos late	42981	D07845	HMDB0014487	39186		1.09		0.3313	0.4574		0.5623	0.6109	1.0865		6	6		Xenobiotics	Drug - Cardiovascular	100004015	33286-22-5	888	415.169
	5652			4-hydroxycoumarin	LC/MS neg	37445	C20414		54682930		2.56		0.6264	0.5994		1.7473	1.7954	2.5614		89	94		Xenobiotics	Drug - Cardiovascular	100002049	1076-38-6	2470	161.024
	5656			warfarin	LC/MS neg	43335	D08682 DG00149 C01541	HMDB0001935	54678486		1					1	1	1		6	0		Xenobiotics	Drug - Cardiovascular	100004175	5543-57-7	3790	307.098
	5662			rivaroxaban	LC/MS neg	52958			9875401		1					1	1	1		0	6		Xenobiotics	Drug - Cardiovascular	100008950	366789-02-8	4425	434.058
	5671			furosemide	LC/MS neg	43009	D00331	HMDB0001933	3440		3.26		0.4353	0.5152		0.1041	0.2375	3.2557		6	17		Xenobiotics	Drug - Cardiovascular	100004241	54-31-9	3515	329
	5681			hydrochlorothiazide	LC/MS neg	39625	C07041	HMDB0001928	3639		0.96		0.3313	0.4574		0.4697	0.4034	0.9585		11	0		Xenobiotics	Drug - Cardiovascular	100002734	58-93-5	2046	295.957
	5697			Benazeprilat	LC/MS neg	64098	D03077	HMDB0060582	5463984		1					1	1	1		6	0		Xenobiotics	Drug - Cardiovascular	100020684		3282	395.161
	5703			tadalafil	LC/MS neg	52950		HMDB0014958	110635		1.04		0.3313	0.4574		0.7597	0.7864	1.0351		6	6		Xenobiotics	Drug - Cardiovascular	100008974	171596-29-5	4898	388.13
	5742		Drug - Gastrointestinal	omeprazole	LC/MS pos late	38600	C07324	HMDB0001913	4594		1					1	1	1		0	6		Xenobiotics	Drug - Gastrointestinal	100002725	73590-58-6	717	346.122
	5746			dexlansoprazole	LC/MS neg	57668	D08903		9578005		0.95		0.3313	0.4574		0.1883	0.0868	0.947		11	0		Xenobiotics	Drug - Gastrointestinal	100015794	138530-94-6	4874	368.069
	5774		Drug - Metabolic	atorvastatin (lipitor)	LC/MS neg	38619	D07474 D00887 D02258	HMDB0005006	60822		1					1	1	1		0	6		Xenobiotics	Drug - Metabolic	100002802	134523-03-8	5101	557.246
	5776			atorvastatin lactone	LC/MS pos late	47878			6483036		1					1	1	1		0	6		Xenobiotics	Drug - Metabolic	100005940	125995-03-1	1190	541.25
	5797			allopurinol	LC/MS neg	43534	D00224	HMDB0014581	135401907		1.04		0.3313	0.4574		0.7213	0.7523	1.0429		6	6		Xenobiotics	Drug - Metabolic	100004518	315-30-0	1530	135.031
	5798			allopurinol riboside	LC/MS neg	38321		HMDB0000481	135407110		1.16		0.3313	0.4574		0.4119	0.4772	1.1587		6	6		Xenobiotics	Drug - Metabolic	100002454	16220-07-8	1660	267.073
	5799			oxypurinol	LC/MS polar	41726	D02365	HMDB0000786	135398752		1.01		0.3313	0.4574		0.0572	0.0686	1.0114		6	11		Xenobiotics	Drug - Metabolic	100002489	2465-59-0	1656	151.026
	5827		Drug - Neurological	lamotrigine	LC/MS pos early	54762	D00354	HMDB0014695	3878		0.99		0.3313	0.4574		0.9515	0.9454	0.9943		6	6		Xenobiotics	Drug - Neurological	100009390		3379	256.015
	5887		Drug - Psychoactive	quetiapine	LC/MS pos late	39787	C07397 D08456 DG00899	HMDB0005021	5002		0.97		0.3313	0.4574		0.6864	0.6472	0.971		6	6		Xenobiotics	Drug - Psychoactive	100002809	111974-69-7	874	384.174
	5889			N-desalkylquetiapine*	LC/MS pos late	62484			11369918		1.01		0.3313	0.4574		0.8972	0.9086	1.0127		6	6		Xenobiotics	Drug - Psychoactive	100020805		874	296.122
	5897			THC carboxylic acid	LC/MS neg	61836			107885		1.1		0.3313	0.4574		0.5315	0.5835	1.0979		6	6		Xenobiotics	Drug - Psychoactive	100016048		5263	343.191
	5898			THC carboxylic acid glucuronide	LC/MS neg	61848					1.01		0.3313	0.4574		0.892	0.904	1.0134		6	6		Xenobiotics	Drug - Psychoactive	100016049		5224	519.224
	5918			midazolam	LC/MS pos late	64122	C07524 D00550	HMDB0014821	4192		0.97		0.1624	0.344		0.9349	0.9011	0.9719		22	0		Xenobiotics	Drug - Psychoactive	100020946	59467-70-8	899	326.085
	5931		Drug - Respiratory	cetirizine	LC/MS pos late	54745	C07778	HMDB0005032	2678		1					1	1	1		6	0		Xenobiotics	Drug - Respiratory	100009034	83881-51-0	1052	389.163
	5956		Drug - Topical Agents	salicylate	LC/MS neg	1515	C00805	HMDB0001895	338		49.25		0.1258	0.3037		8.8673	18.6458	49.2468		100	100		Xenobiotics	Drug - Topical Agents	501	69-72-7	2195	137.024
	5958			2,6-dihydroxybenzoic acid	LC/MS neg	63042		HMDB0013676	9338		1.44		0.0144	0.1523		0.8822	1.2146	1.4397		100	100		Xenobiotics	Drug - Topical Agents	100020837	303-07-1	2575	153.019
	5962			hydroquinone sulfate	LC/MS neg	35322	C00530	HMDB0240263	161220		1.93		0.3712	0.4796		1.0522	1.1469	1.9283		100	100		Xenobiotics	Drug - Topical Agents	100001604	123-31-9	1395	188.986
	6083		Chemical	sulfate*	LC/MS neg	46960	C00059	HMDB01448	5152822		0.97		0.2693	0.4256		1.0092	0.9643	0.9705		100	100		Xenobiotics	Chemical	100002528	14808-79-8	616	96.9601
	6086			O-sulfo-L-tyrosine	LC/MS neg	45413			514186		0.97		0.3102	0.4544		1.124	1.0676	0.9704		100	100		Xenobiotics	Chemical	100005384		990	260.023
	6090			ethyl glucuronide	LC/MS neg	39603		HMDB0010325	18392195		5.05		0.9202	0.6851		1.6569	2.668	5.0502		89	83		Xenobiotics	Chemical	100002849	17685-04-0	793	221.067
	6104			3-acetylphenol sulfate	LC/MS neg	48693					4.4		0.0161	0.1563		1.1748	2.0877	4.4005		100	100		Xenobiotics	Chemical	100004326		2477	215.002
	6149			dimethyl sulfone	LC/MS pos early	43424	C11142	HMDB0004983	6213		1.69		0.1436	0.3202		1.032	1.1076	1.6947		94	94		Xenobiotics	Chemical	100004284	67-71-0	832	95.0161
	6151			ectoine	LC/MS pos early	35651	C06231		126041		1.42		0.9488	0.6932		1.2437	1.6614	1.4221		100	100		Xenobiotics	Chemical	100001635	96702-03-3	1980	143.082
	6152			EDTA	LC/MS neg	22163	C00284	HMDB0015109	6049		1.2		0.0362	0.1982		0.9815	1.1538	1.2005		100	100		Xenobiotics	Chemical	100001002	60-00-4	643	291.083
	6161			iminodiacetate (IDA)	LC/MS pos early	21025	C19911	HMDB0011753	8897		1.4		0.2199	0.3905		0.9877	1.2874	1.3996		100	100		Xenobiotics	Chemical	100000900	142-73-4	830	134.045
	6172			2-naphthol sulfate	LC/MS neg	62520			74428		1.23		0.3413	0.4645		1.7069	1.4259	1.2298		100	100		Xenobiotics	Chemical	100020515		3658	223.007
	6174			2,4-di-tert-butylphenol	LC/MS neg	64328					1.9		0.0384	0.2035		0.948	1.6605	1.8975		100	100		Xenobiotics	Chemical	100021918	96-76-4	5749	205.16
	6187			perfluorooctanesulfonate (PFOS)	LC/MS polar	57564	C18142	HMDB0059586	74483		0.82		5.7422e-08	4.517e-05		1.3895	1.1196	0.8162		100	100		Xenobiotics	Chemical	100010955	1763-23-1	662	498.93
	6196			succinimide	LC/MS neg	41888	C07273		11439		1.37		0.9599	0.6948		1.0899	1.1293	1.3705		94	89		Xenobiotics	Chemical	100003696	123-56-8	1270	98.0247
	6210			4-hydroxychlorothalonil	LC/MS neg	48441			34217		0.9		0.0701	0.246		1.2858	1.0458	0.9013		100	100		Xenobiotics	Chemical	100006082	28343-61-5	4427	244.908
	6215			1,2,3-benzenetriol sulfate (2)	LC/MS neg	48762		HMDB0060018 HMDB0060016	54110629;92013662		8.72		0.1729	0.3547		2.5816	1.6818	8.7218		100	100		Xenobiotics	Chemical	100006374		1709	204.981
	6217			2-methoxyresorcinol sulfate	LC/MS neg	48445					6.49		0.2739	0.4298		2.3361	1.3555	6.4913		78	100		Xenobiotics	Chemical	100006184	1446269-78-8	1863	218.997
	6218			3-hydroxypyridine sulfate	LC/MS neg	48448					6.64		0.0082	0.1333		0.9832	1.7544	6.6385		100	100		Xenobiotics	Chemical	100006098	1955-23-3	1595.5	173.987
	6219			3-hydroxypyridine glucuronide	LC/MS neg	63236					9.99		0.02	0.1648		0.7474	1.5904	9.9925		61	89		Xenobiotics	Chemical	100020591		1080	270.062
	6223			1,2,3-benzenetriol sulfate (1)	LC/MS neg	48761					3.69		0.8446	0.6653		2.5636	1.1	3.6888		44	78		Xenobiotics	Chemical	100006373		1453	204.981
	6232			6-hydroxyindole sulfate	LC/MS neg	48698		HMDB0000682	122198196		1.03		0.3987	0.4959		1.2986	1.1958	1.0252		100	100		Xenobiotics	Chemical	100006260		2498	212.002
	6236			thioproline	LC/MS pos early	53231			93176		1.03		0.7497	0.6404		1.0218	1.0372	1.0292		100	100		Xenobiotics	Chemical	100009232	34592-47-4	1250	134.027
	6238			perfluorooctanoate (PFOA)	LC/MS polar	62071		HMDB0059587	9554		0.77		9.6903e-08	4.517e-05		1.2406	0.9259	0.7658		100	100		Xenobiotics	Chemical	100020208		685	412.966
	6249			5-hydroxy-2-methylpyridine sulfate	LC/MS neg	63230					35.57		0.0403	0.2055		1.2405	1.7403	35.5682		78	100		Xenobiotics	Chemical	100020973		2074	188.002
	6251			3-hydroxy-2-methylpyridine sulfate	LC/MS neg	63227					29.55		0.0067	0.1197		1.1189	2.3958	29.5533		94	100		Xenobiotics	Chemical	100020975		1849	188.002
	6256			3,5-dichloro-2,6-dihydroxybenzoic acid	LC/MS polar	63589			24721632		0.79		5.2188e-07	0.0002		1.1143	0.8655	0.7851		100	100		Xenobiotics	Chemical	100021324		693	220.941
	6257			3-bromo-5-chloro-2,6-dihydroxybenzoic acid*	LC/MS neg	63681			134581543		0.93		0.1157	0.2976		1.0847	0.9752	0.9272		100	100		Xenobiotics	Chemical	100021707		4505	264.891
	6258			dibutyl sulfosuccinate	LC/MS neg	63841			423891		10.22		0.192	0.371		0.9837	8.6143	10.2208		100	100		Xenobiotics	Chemical	100021538	5144-51-4	3557	309.101
	6263			4-chlorobenzoic acid	LC/MS neg	63988	C02370		6318		1.01		0.4663	0.5269		0.9995	1.0106	1.0134		100	100		Xenobiotics	Chemical	100021784	74-11-3	3015	154.991
	6367	Partially Characterized Molecules	Partially Characterized Molecules	glucuronide of C10H18O2 (1)*	LC/MS neg	61881					2.18		0.5083	0.5472		1.9281	5.6187	2.1842		56	67		Partially Characterized Molecules	Partially Characterized Molecules	100019990		2728	345.156
	6373			glucuronide of C10H18O2 (7)*	LC/MS neg	61887					3.13		0.1368	0.3135		1.9438	10.1465	3.1279		89	94		Partially Characterized Molecules	Partially Characterized Molecules	100020014		3790	345.156
	6374			glucuronide of C10H18O2 (8)*	LC/MS neg	61888					2.58		0.1198	0.3002		1.145	6.3073	2.5758		50	50		Partially Characterized Molecules	Partially Characterized Molecules	100020015		3865	345.156
	6385			glucuronide of C12H22O4 (1)*	LC/MS neg	61874					5.48		0.078	0.2527		0.7652	1.2115	5.4839		78	94		Partially Characterized Molecules	Partially Characterized Molecules	100019984		2590	405.177
	6386			glucuronide of C12H22O4 (2)*	LC/MS neg	61875					2.13		0.158	0.3394		0.7266	1.0182	2.1265		67	89		Partially Characterized Molecules	Partially Characterized Molecules	100019985		2700	405.177
	6390			glucuronide of C14H26O4 (1)*	LC/MS neg	61876					3.64		0.1326	0.3103		0.9681	1.4511	3.6407		67	89		Partially Characterized Molecules	Partially Characterized Molecules	100019986		3200	433.208
	6395			glutamine conjugate of C6H10O2 (1)*	LC/MS neg	63657					0.84		0.0297	0.1861		1.3278	0.9965	0.8359		100	100		Partially Characterized Molecules	Partially Characterized Molecules	100020261		2404	241.119
	6396			glutamine conjugate of C6H10O2 (2)*	LC/MS neg	63660					0.9		0.1099	0.2904		1.5152	1.1127	0.9009		100	100		Partially Characterized Molecules	Partially Characterized Molecules	100020262		2526	241.119
	6397			glutamine conjugate of C7H12O2*	LC/MS neg	63658					0.87		0.0545	0.2243		1.6328	0.9737	0.8723		100	100		Partially Characterized Molecules	Partially Characterized Molecules	100020259		3053	255.135
	6413			glycine conjugate of C10H12O2*	LC/MS neg	62145					1.51		0.1981	0.3754		0.9959	1.2422	1.5079		100	100		Partially Characterized Molecules	Partially Characterized Molecules	100020253		4005	220.098
	6414			glycine conjugate of C10H14O2 (1)*	LC/MS neg	62146					1.37		0.0551	0.2251		1.0308	1.2548	1.3673		100	100		Partially Characterized Molecules	Partially Characterized Molecules	100020254		4335	222.114
	6418			metabolonic lactone sulfate	LC/MS neg	63153					0.96		0.3079	0.4535		1.5068	1.4541	0.9641		100	100		Partially Characterized Molecules	Partially Characterized Molecules	100021331		4802	427.216
	6419			pentose acid*	LC/MS polar	63264	C00803	HMDB0000892	7991		1.57		0.0408	0.2055		1.2121	1.5126	1.5711		100	100		Partially Characterized Molecules	Partially Characterized Molecules	100021467		2180	165.04
	6424			carnitine of C10H14O2 (5)*	LC/MS neg	63650					1.25		0.078	0.2527		1.1165	1.2619	1.2486		100	100		Partially Characterized Molecules	Partially Characterized Molecules	100021678		4521	370.187
	6426			branched-chain, straight-chain, or cyclopropyl 10:1 fatty acid (1)*	LC/MS neg	63615					1.32		0.8969	0.6831		1.4266	1.5445	1.323		100	100		Partially Characterized Molecules	Partially Characterized Molecules	100021666		4805	169.123
	6427			branched-chain, straight-chain, or cyclopropyl 10:1 fatty acid (2)*	LC/MS neg	63616					1.07		0.8577	0.6717		1.1186	1.1609	1.0725		100	100		Partially Characterized Molecules	Partially Characterized Molecules	100021667		4853	169.123
	6429			branched-chain, straight-chain, or cyclopropyl 12:1 fatty acid*	LC/MS neg	63683					1.22		0.3238	0.4574		1.4608	1.1245	1.2167		100	100		Partially Characterized Molecules	Partially Characterized Molecules	100021709		5261	197.155
	6431			GlcNAc sulfate conjugate of C21H34O2 steroid**	LC/MS neg	63699					1.2		0.8549	0.6703		0.9694	0.9332	1.2002		78	83		Partially Characterized Molecules	Partially Characterized Molecules	100021726		4336.7	299.639
	6439			bilirubin degradation product, C16H18N2O5 (1)**	LC/MS neg	64403					0.81		0.0056	0.1135		1.3121	1.0329	0.8085		100	100		Partially Characterized Molecules	Partially Characterized Molecules	100022003		3098	317.114
	6440			bilirubin degradation product, C16H18N2O5 (2)**	LC/MS neg	64404					0.82		0.0069	0.1212		1.2893	1.0333	0.8181		100	100		Partially Characterized Molecules	Partially Characterized Molecules	100022004		3204	317.114
	6441			bilirubin degradation product, C17H18N2O4 (1)**	LC/MS neg	64409					0.83		0.008	0.133		1.273	1.0166	0.8269		100	100		Partially Characterized Molecules	Partially Characterized Molecules	100022005		4633	313.119
	6442			bilirubin degradation product, C17H18N2O4 (2)**	LC/MS neg	64407					0.85		0.0189	0.1648		1.3565	1.096	0.8472		100	100		Partially Characterized Molecules	Partially Characterized Molecules	100022006		4793	313.119
	6443			bilirubin degradation product, C17H18N2O4 (3)**	LC/MS neg	64408					0.88		0.0499	0.2165		1.4051	1.1712	0.8782		100	100		Partially Characterized Molecules	Partially Characterized Molecules	100022007		4906	313.119
	6444			bilirubin degradation product, C17H20N2O5 (1)**	LC/MS neg	64405					0.9		0.0749	0.2515		1.2032	1.0387	0.8982		100	100		Partially Characterized Molecules	Partially Characterized Molecules	100022008		3756	331.13
	6445			bilirubin degradation product, C17H20N2O5 (2)**	LC/MS neg	64406					0.9		0.0802	0.256		1.2123	1.051	0.9014		100	100		Partially Characterized Molecules	Partially Characterized Molecules	100022009		3890	331.13
	6446			bilirubin degradation product, C16H18N2O5 (3)**	LC/MS neg	64414					0.81		0.0056	0.1135		1.2855	1.0084	0.8104		100	100		Partially Characterized Molecules	Partially Characterized Molecules	100022014		3354	317.114
	6447			bilirubin degradation product, C16H18N2O5 (4)**	LC/MS neg	64415					0.78		0.0031	0.1067		1.3575	1.0119	0.78		100	100		Partially Characterized Molecules	Partially Characterized Molecules	100022015		3428	317.114
	6448			glutamine_degradant*	LC/MS pos early	46225		HMDB0062558	134508		1.06		0.9134	0.6851		1.3223	1.3677	1.0644		100	100		Partially Characterized Molecules	Partially Characterized Molecules	100001540	2353-44-8	1900	129.066
		N/A	N/A	X - 07765	LC/MS neg	46590					8.3		0.0447	0.2112		1.1319	1.8365	8.2978		100	100		N/A	N/A
				X - 10458	LC/MS neg	47478					1.1		0.9176	0.6851		1.0397	1.0249	1.0976		100	100		N/A	N/A
				X - 11299	LC/MS neg	46592					1.7		0.9307	0.6888		1.5121	1.252	1.704		100	100		N/A	N/A
				X - 11308	LC/MS neg	46390					0.82		0.0001	0.0117		1.1789	0.9622	0.8189		100	100		N/A	N/A
				X - 11315	LC/MS neg	49592					0.94		0.032	0.1946		1.0575	0.9956	0.935		100	100		N/A	N/A
				X - 11372	LC/MS neg	46594					0.78		0.0011	0.0767		1.3208	0.9754	0.7779		100	100		N/A	N/A
				X - 11378	LC/MS neg	46595					0.93		0.1114	0.2918		1.1859	1.0708	0.9291		100	100		N/A	N/A
				X - 11381	LC/MS neg	46347					0.94		0.0673	0.2413		1.0399	0.9685	0.937		100	100		N/A	N/A
				X - 11444	LC/MS neg	46460					1.6		0.9396	0.6911		1.2994	1.1167	1.5983		100	100		N/A	N/A
				X - 11470	LC/MS neg	46601					1.2		0.6166	0.5952		1.1247	0.9524	1.2016		94	100		N/A	N/A
				X - 11478	LC/MS neg	46602					1.11		0.5257	0.5541		1.1616	1.2108	1.1133		100	100		N/A	N/A
				X - 11483	LC/MS neg	47650					1.54		0.9967	0.7032		1.3927	1.1133	1.5407		100	100		N/A	N/A
				X - 11632	LC/MS neg	47493					1.08		0.7593	0.6432		0.9784	1.0337	1.0833		100	100		N/A	N/A
				X - 11787	LC/MS neg	33132					0.98		0.4444	0.5189		1.0196	0.9871	0.9846		100	100		N/A	N/A
				X - 11795	LC/MS pos early	33140					1.62		0.2525	0.4172		1.0713	1.506	1.6163		100	100		N/A	N/A
				X - 11843	LC/MS neg	46466					1.29		0.6883	0.6188		10.4238	6.041	1.2941		100	100		N/A	N/A
				X - 11847	LC/MS neg	46488					8.38		0.0398	0.2048		3.8309	3.7315	8.377		89	94		N/A	N/A
				X - 11849	LC/MS neg	46607					4.79		0.0645	0.2348		2.095	2.2148	4.7894		89	94		N/A	N/A
				X - 11850	LC/MS neg	46507					1.43		0.7909	0.6468		10.4992	6.3859	1.4299		100	100		N/A	N/A
				X - 11852	LC/MS neg	46521					3.16		0.5739	0.5801		3.3828	7.5072	3.1639		100	100		N/A	N/A
				X - 11858	LC/MS neg	47654					14.28		0.0574	0.2277		2.8697	4.3785	14.2849		78	89		N/A	N/A
				X - 11861	LC/MS neg	47655					1.7		0.019	0.1648		0.8512	1.1735	1.6991		89	94		N/A	N/A
				X - 11880	LC/MS neg	46608					0.88		0.0455	0.2112		1.2454	1.046	0.8786		100	100		N/A	N/A
				X - 11979	LC/MS neg	47508					1.11		0.3184	0.4574		1.0093	1.0537	1.114		100	100		N/A	N/A
				X - 12007	LC/MS neg	46610					3.12		0.0744	0.2513		1.3295	1.3026	3.1216		100	100		N/A	N/A
				X - 12013	LC/MS neg	46611					1.12		0.4379	0.5162		9.3792	4.7213	1.1205		94	100		N/A	N/A
				X - 12015	LC/MS neg	47390					1.03		0.5745	0.5801		1.1119	1.1305	1.0338		100	100		N/A	N/A
				X - 12026	LC/MS neg	47905					1.03		0.886	0.681		1.1406	1.1211	1.0297		100	100		N/A	N/A
				X - 12027	LC/MS neg	47510					1.36		0.7671	0.6451		1.8516	1.0984	1.3553		78	89		N/A	N/A
				X - 12100	LC/MS pos early	47687					1.1		0.1077	0.2869		1.0211	1.1072	1.1005		100	100		N/A	N/A
				X - 12101	LC/MS pos early	47642					1.1		0.4744	0.529		1.5541	1.188	1.0979		94	100		N/A	N/A
				X - 12104	LC/MS neg	52597					1.09		0.6794	0.6155		1.1056	1.019	1.086		100	100		N/A	N/A
				X - 12111	LC/MS neg	52797					7.49		0.2305	0.4015		0.8772	1.6554	7.4903		67	83		N/A	N/A
				X - 12112	LC/MS pos early	47690					1.12		0.2826	0.4352		1.3326	1.4079	1.1236		100	100		N/A	N/A
				X - 12117	LC/MS pos early	47695					1.14		0.0322	0.1946		1.0427	1.1613	1.1376		100	100		N/A	N/A
				X - 12126	LC/MS neg	46966					0.79		0.0106	0.1439		1.33	1.1393	0.7919		94	89		N/A	N/A
				X - 12127	LC/MS pos early	47702					1.21		0.9204	0.6851		1.0454	1.2651	1.2116		94	83		N/A	N/A
				X - 12193	LC/MS neg	46985					1.38		0.263	0.4236		1.0305	1.2406	1.3812		94	100		N/A	N/A
				X - 12199	LC/MS pos early	47706					2.92		0.0435	0.2094		0.7702	1.2246	2.9169		78	89		N/A	N/A
				X - 12216	LC/MS neg	46613					1.12		0.304	0.4519		1.4043	1.1755	1.1217		100	100		N/A	N/A
				X - 12221	LC/MS neg	47911					3.67		0.0271	0.182		0.9309	1.4144	3.6733		89	100		N/A	N/A
				X - 12261	LC/MS neg	47657					0.95		0.2177	0.3896		0.9767	0.5739	0.9494		44	50		N/A	N/A
				X - 12283	LC/MS pos early	47708					1.01		0.4707	0.5283		0.9511	0.8415	1.0118		72	61		N/A	N/A
				X - 12306	LC/MS neg	47917					1.83		0.1261	0.3037		1.3593	1.3519	1.8292		61	72		N/A	N/A
				X - 12407	LC/MS neg	46615					8.83		0.0903	0.2718		1.7574	1.9108	8.8295		89	100		N/A	N/A
				X - 12410	LC/MS neg	47921					0.96		0.1328	0.3103		1.7289	1.2659	0.9601		100	100		N/A	N/A
				X - 12411	LC/MS neg	46616					1.29		0.6621	0.6084		1.1957	1.3582	1.2926		100	100		N/A	N/A
				X - 12456	LC/MS neg	47639					0.96		0.2314	0.4017		1.5154	1.4768	0.9562		100	100		N/A	N/A
				X - 12462	LC/MS pos early	46620					1.01		0.781	0.6468		1.0095	0.9959	1.0053		100	100		N/A	N/A
				X - 12544	LC/MS neg	46510					1.27		0.248	0.4134		4.5953	6.9715	1.2717		94	100		N/A	N/A
				X - 12680	LC/MS pos early	47437					2.47		0.0018	0.082		0.7862	1.4243	2.4666		100	100		N/A	N/A
				X - 12701	LC/MS neg	46962					5.1		0.0139	0.1501		0.9752	1.2475	5.0992		94	100		N/A	N/A
				X - 12707	LC/MS neg	47929					1.03		0.9596	0.6948		1.0934	1.1304	1.0302		100	100		N/A	N/A
				X - 12708	LC/MS neg	47930					1.23		0.2337	0.4037		1.0681	1.1541	1.2267		100	100		N/A	N/A
				X - 12713	LC/MS neg	47932					1.16		0.2624	0.4236		1.0887	1.2136	1.1576		100	100		N/A	N/A
				X - 12714	LC/MS neg	46318					2.88		0.041	0.2055		1.0866	1.4681	2.8828		94	100		N/A	N/A
				X - 12718	LC/MS neg	46973					1.23		0.8125	0.6553		1.2854	1.4227	1.2268		100	100		N/A	N/A
				X - 12726	LC/MS neg	47936					2.01		0.0719	0.2476		1.1614	1.3162	2.009		83	94		N/A	N/A
				X - 12729	LC/MS neg	46623					1.8		0.5594	0.5744		1.5333	1.9298	1.7951		100	100		N/A	N/A
				X - 12730	LC/MS neg	47937					16.16		0.0084	0.1335		0.9628	1.6697	16.1551		72	100		N/A	N/A
				X - 12731	LC/MS neg	47938					2.05		0.0681	0.2423		1.5604	1.7222	2.0493		94	100		N/A	N/A
				X - 12738	LC/MS neg	47940					16.11		0.0089	0.1346		1.052	2.0485	16.1096		67	94		N/A	N/A
				X - 12740	LC/MS neg	46627					4.42		0.5957	0.5859		4.4835	4.7062	4.4164		94	78		N/A	N/A
				X - 12798	LC/MS pos early	46624					0.96		0.2506	0.4157		1.0699	1.048	0.9604		100	100		N/A	N/A
				X - 12812	LC/MS neg	46986					3.54		0.1293	0.3065		1.226	2.3572	3.5356		94	100		N/A	N/A
				X - 12815	LC/MS neg	47942					6.26		0.4058	0.5001		0.7424	2.7517	6.2592		39	33		N/A	N/A
				X - 12816	LC/MS neg	46630					1.61		0.7374	0.6375		0.8007	0.9001	1.6063		78	78		N/A	N/A
				X - 12818	LC/MS neg	47943					4.11		0.0037	0.1067		0.8	1.6188	4.1132		89	100		N/A	N/A
				X - 12822	LC/MS neg	46997					1.1		0.7645	0.6448		1.1828	1.3236	1.0981		100	100		N/A	N/A
				X - 12830	LC/MS neg	47662					2.06		0.8212	0.6594		1.6871	1.5545	2.057		78	72		N/A	N/A
				X - 12839	LC/MS neg	47014					0.73		0.0044	0.1067		1.4027	0.8619	0.7334		89	94		N/A	N/A
				X - 12844	LC/MS neg	46633					0.9		0.0503	0.2172		1.2162	1.0361	0.9027		100	100		N/A	N/A
				X - 12847	LC/MS neg	46364					0.97		0.0958	0.2755		1.812	1.0362	0.9686		100	100		N/A	N/A
				X - 12849	LC/MS neg	46636					2.49		0.8005	0.6495		1.894	1.4875	2.4863		100	94		N/A	N/A
				X - 12851	LC/MS neg	46639					0.9		0.1076	0.2869		3.3142	2.1755	0.9046		72	83		N/A	N/A
				X - 12906	LC/MS neg	47955					1.02		0.7029	0.6259		1.1755	1.1234	1.0238		100	100		N/A	N/A
				X - 13007	LC/MS neg	47203					1.06		0.5556	0.5742		1.0751	0.9579	1.0633		100	100		N/A	N/A
				X - 13431	LC/MS pos late	47788					1.6		0.0202	0.1648		0.9662	1.2427	1.601		100	100		N/A	N/A
				X - 13507	LC/MS pos early	47439					1.44		0.4513	0.5208		1.1082	1.365	1.4403		78	83		N/A	N/A
				X - 13553	LC/MS neg	47959					1.13		0.0276	0.1831		1.0745	1.2331	1.1313		100	100		N/A	N/A
				X - 13658	LC/MS neg	47664					0.86		0.0109	0.1439		1.0644	0.8063	0.856		72	72		N/A	N/A
				X - 13684	LC/MS pos early	47790					0.9		0.1033	0.283		1.448	1.1216	0.9042		100	100		N/A	N/A
				X - 13688	LC/MS neg	47960					1.05		0.7301	0.6344		1.0364	0.9858	1.0525		100	100		N/A	N/A
				X - 13695	LC/MS neg	47962					4.26		0.0043	0.1067		0.9345	1.4752	4.2599		78	100		N/A	N/A
				X - 13723	LC/MS neg	47965					4.18		0.0255	0.18		0.885	1.3715	4.1808		72	94		N/A	N/A
				X - 13726	LC/MS neg	47967					1.31		0.4905	0.5348		1.1915	2.1938	1.3054		72	61		N/A	N/A
				X - 13728	LC/MS neg	46645					2.39		0.4304	0.5121		1.2448	1.5319	2.3907		100	100		N/A	N/A
				X - 13729	LC/MS neg	47971					1.19		0.6859	0.6184		1.3959	1.425	1.1888		100	100		N/A	N/A
				X - 13844	LC/MS neg	47977					3.17		0.0024	0.1015		0.9004	1.9188	3.1651		100	100		N/A	N/A
				X - 13846	LC/MS neg	47978					2.89		0.0324	0.1946		1.0633	2.7434	2.893		72	94		N/A	N/A
				X - 13866	LC/MS neg	46417					2.41		0.0622	0.2321		1.16	2.4819	2.4143		100	100		N/A	N/A
				X - 14056	LC/MS pos early	46632					0.91		0.0986	0.2786		1.119	0.9633	0.9137		100	100		N/A	N/A
				X - 14904	LC/MS neg	47204					1.2		0.7461	0.6404		1.0919	0.9449	1.1998		89	100		N/A	N/A
				X - 14939	LC/MS neg	46657					0.99		0.477	0.5291		1.1556	1.12	0.9897		100	100		N/A	N/A
				X - 15220	LC/MS neg	46658					1.07		0.6376	0.6027		1.1786	1.146	1.0712		100	100		N/A	N/A
				X - 15245	LC/MS neg	46661					4.33		0.1257	0.3037		0.9196	0.8095	4.3326		83	61		N/A	N/A
				X - 15461	LC/MS pos early	46283					1.05		0.9189	0.6851		1.0559	1.065	1.0528		100	100		N/A	N/A
				X - 15486	LC/MS neg	46266					1.19		0.5291	0.5561		1.0854	1.1358	1.1877		100	100		N/A	N/A
				X - 15503	LC/MS neg	46977					1.13		0.3072	0.4535		1.0263	1.1349	1.1312		100	100		N/A	N/A
				X - 15674	LC/MS neg	46665					1.02		0.2657	0.4238		1.0133	0.9106	1.0212		100	94		N/A	N/A
				X - 15728	LC/MS neg	46666					1.14		0.4614	0.5249		2.0735	1.4921	1.1382		100	100		N/A	N/A
				X - 16087	LC/MS neg	47988					1.13		0.685	0.6184		1.2994	1.2965	1.1314		100	100		N/A	N/A
				X - 16124	LC/MS neg	46461					4.28		0.6237	0.5994		24.788	34.6873	4.2784		89	83		N/A	N/A
				X - 16397	LC/MS pos early	47802					1.24		0.706	0.6265		1.0369	1.0102	1.2403		100	100		N/A	N/A
				X - 16576	LC/MS neg	46673					0.99		0.4141	0.5047		1.2376	1.1124	0.9928		100	100		N/A	N/A
				X - 16580	LC/MS pos early	47804					0.96		0.1865	0.3698		1.1321	0.968	0.9592		100	100		N/A	N/A
				X - 16649	LC/MS neg	47992					1.43		0.7835	0.6468		0.613	1.0563	1.4302		33	28		N/A	N/A
				X - 16935	LC/MS neg	46681					0.84		5.6493e-05	0.0088		1.1269	0.9282	0.8408		100	100		N/A	N/A
				X - 16964	LC/MS neg	46685					0.93		0.0257	0.1802		1.0558	0.9715	0.9324		100	100		N/A	N/A
				X - 17010	LC/MS neg	47993					3.12		0.0043	0.1067		0.807	1.8416	3.1227		100	100		N/A	N/A
				X - 17146	LC/MS neg	46691					104.34		0.3588	0.4749		0.5192	2.683	104.339		56	67		N/A	N/A
				X - 17325	LC/MS neg	46672					3.05		0.5196	0.5517		1.0694	1.4927	3.0521		94	100		N/A	N/A
				X - 17335	LC/MS pos late	47820					0.98		0.3996	0.4959		0.9866	0.9071	0.9808		94	100		N/A	N/A
				X - 17343	LC/MS neg	47995					3.88		0.4457	0.5189		5.6654	5.0841	3.8821		67	72		N/A	N/A
				X - 17346	LC/MS neg	47997					2.51		0.0826	0.2601		0.906	1.4194	2.5072		100	100		N/A	N/A
				X - 17348	LC/MS neg	46989					3.33		0.4762	0.5291		1.8769	1.1288	3.3345		72	78		N/A	N/A
				X - 17349	LC/MS neg	47999					6.78		0.0856	0.2651		0.8587	2.1547	6.7836		50	78		N/A	N/A
				X - 17351	LC/MS neg	48001					0.96		0.2304	0.4015		0.8586	0.7389	0.9567		78	89		N/A	N/A
				X - 17354	LC/MS neg	47009					2.67		0.081	0.2569		0.4996	1.0386	2.6678		56	67		N/A	N/A
				X - 17357	LC/MS neg	48009					1.03		0.6569	0.6049		1.029	0.9997	1.0317		94	100		N/A	N/A
				X - 17367	LC/MS neg	46994					2.76		0.49	0.5348		0.9502	1.4631	2.7628		89	78		N/A	N/A
				X - 17398	LC/MS neg	48051					1.57		0.23	0.4015		1.6274	2.0423	1.5731		33	50		N/A	N/A
				X - 17438	LC/MS neg	46705					1.1		0.4505	0.5208		1.369	1.055	1.0995		100	100		N/A	N/A
				X - 17612	LC/MS neg	48052					1.07		0.4722	0.5283		1.0799	0.9174	1.0733		78	78		N/A	N/A
				X - 17653	LC/MS neg	46707					0.96		0.261	0.4236		1.2012	1.0555	0.9627		100	100		N/A	N/A
				X - 17654	LC/MS neg	46709					0.84		0.0001	0.0117		1.1975	0.9966	0.84		100	100		N/A	N/A
				X - 17655	LC/MS neg	48019					20.06		0.3647	0.4768		1.9686	10.0787	20.0615		44	39		N/A	N/A
				X - 17676	LC/MS neg	46970					1.56		0.0015	0.0811		0.9441	1.3654	1.5627		100	100		N/A	N/A
				X - 17682	LC/MS neg	48024					1.14		0.7266	0.6336		0.9907	1.0623	1.1395		83	100		N/A	N/A
				X - 17685	LC/MS neg	48025					7.77		0.1099	0.2904		1.4429	1.1388	7.7682		94	100		N/A	N/A
				X - 17690	LC/MS neg	46710					2.06		0.3132	0.4549		4.1592	1.9549	2.0631		100	100		N/A	N/A
				X - 17765	LC/MS neg	48055					6.66		0.2182	0.3896		0.8998	1.4673	6.6588		72	89		N/A	N/A
				X - 18240	LC/MS neg	48041					5.98		0.1415	0.3185		0.9299	1.8115	5.9771		61	83		N/A	N/A
				X - 18345	LC/MS neg	47342					2.27		0.5232	0.553		1.6002	2.9934	2.2711		94	94		N/A	N/A
				X - 18838	LC/MS neg	48046					1.03		0.9578	0.6948		0.9435	0.9262	1.0253		61	67		N/A	N/A
				X - 18886	LC/MS neg	48047					1.17		0.1097	0.2904		0.9318	1.0131	1.1683		100	100		N/A	N/A
				X - 18887	LC/MS neg	47301					1.38		0.1995	0.3772		1.124	1.3569	1.3783		100	100		N/A	N/A
				X - 18888	LC/MS neg	48048					1.34		0.1797	0.3642		0.9407	1.166	1.3394		100	100		N/A	N/A
				X - 18901	LC/MS neg	46690					1.27		0.8653	0.6734		1.5929	1.5597	1.2742		100	100		N/A	N/A
				X - 18913	LC/MS neg	46695					1.73		0.0889	0.271		0.9515	1.2861	1.7324		100	100		N/A	N/A
				X - 18921	LC/MS neg	47671					1.12		0.7927	0.6468		1.1744	1.2201	1.1248		100	100		N/A	N/A
				X - 18922	LC/MS neg	46700					1.09		0.2834	0.4352		1.0258	1.0819	1.0946		100	100		N/A	N/A
				X - 18935	LC/MS neg	48049					0.84		0.0261	0.1804		1.2106	1.0563	0.8386		83	78		N/A	N/A
				X - 19141	LC/MS neg	46701					1.2		0.0665	0.2395		0.947	1.1288	1.1971		100	100		N/A	N/A
				X - 19299	LC/MS neg	47673					16.01		0.6255	0.5994		3.4094	7.9487	16.0135		94	83		N/A	N/A
				X - 19438	LC/MS neg	46261					1.18		0.4203	0.5085		1.104	0.9325	1.184		100	100		N/A	N/A
				X - 21258	LC/MS neg	46259					1.65		0.2933	0.4438		0.9454	1.3552	1.6534		100	100		N/A	N/A
				X - 21286	LC/MS neg	46295					1.11		0.8858	0.681		1.2574	1.3055	1.1124		100	100		N/A	N/A
				X - 21310	LC/MS neg	46354					1		0.4891	0.5346		0.9728	0.9329	1.0046		100	100		N/A	N/A
				X - 21312	LC/MS neg	46356					1.72		0.3655	0.4772		1.3338	1.6933	1.7198		94	83		N/A	N/A
				X - 21319	LC/MS neg	46363					0.95		0.2326	0.403		1.1426	1.0337	0.9509		100	100		N/A	N/A
				X - 21339	LC/MS neg	46384					0.79		1.1613e-06	0.0003		1.2253	0.9675	0.791		100	100		N/A	N/A
				X - 21342	LC/MS neg	46387					1.05		0.6429	0.6031		1.0208	1.0617	1.0499		100	100		N/A	N/A
				X - 21351	LC/MS neg	46396					1.22		0.0326	0.1946		1.0001	1.2051	1.2175		100	100		N/A	N/A
				X - 21353	LC/MS neg	46398					0.99		0.2962	0.4459		1.1323	1.0351	0.9914		100	100		N/A	N/A
				X - 21364	LC/MS neg	46409					0.91		0.0427	0.2077		1.0106	0.8954	0.91		94	94		N/A	N/A
				X - 21383	LC/MS neg	46428					1.3		0.4348	0.5152		1.274	1.3662	1.3049		100	100		N/A	N/A
				X - 21441	LC/MS neg	46486					0.91		0.071	0.2476		1.0561	0.9306	0.9149		94	94		N/A	N/A
				X - 21442	LC/MS neg	46487					2.24		0.013	0.1493		1.011	1.6905	2.2439		100	100		N/A	N/A
				X - 21467	LC/MS neg	46512					0.9		0.0452	0.2112		1.0486	0.922	0.8986		100	100		N/A	N/A
				X - 21470	LC/MS neg	46515					1.05		0.2986	0.4468		1.0248	0.9059	1.0466		89	94		N/A	N/A
				X - 21471	LC/MS neg	46516					0.94		0.1657	0.3486		1.22	1.1481	0.9376		100	100		N/A	N/A
				X - 21607	LC/MS neg	46674					1.06		0.6041	0.5891		1.1066	1.168	1.0572		100	100		N/A	N/A
				X - 21661	LC/MS neg	46730					3.22		0.139	0.316		2.3128	3.5805	3.2166		67	67		N/A	N/A
				X - 21733	LC/MS neg	46902					1.04		0.3334	0.4578		1.5404	1.1909	1.0367		83	83		N/A	N/A
				X - 21736	LC/MS neg	46905					1.17		0.7864	0.6468		1.1179	1.2557	1.1712		100	100		N/A	N/A
				X - 21740	LC/MS neg	46909					0.99		0.4879	0.5339		1.0272	0.998	0.9895		100	100		N/A	N/A
				X - 21742	LC/MS neg	46911					3.41		0.748	0.6404		0.8437	1.1373	3.4144		61	39		N/A	N/A
				X - 21752	LC/MS neg	46923					1.3		0.1894	0.371		2.402	1.9917	1.2975		83	83		N/A	N/A
				X - 21788	LC/MS neg	46964					1.26		0.1521	0.33		0.8977	1.0382	1.2592		100	100		N/A	N/A
				X - 21796	LC/MS neg	46972					0.98		0.4218	0.5085		1.0004	0.9718	0.9842		100	100		N/A	N/A
				X - 21803	LC/MS neg	46980					6.52		0.4179	0.5073		27.2316	1.8593	6.5196		50	67		N/A	N/A
				X - 21807	LC/MS neg	46984					3.09		0.002	0.0877		0.9437	1.4405	3.0905		83	100		N/A	N/A
				X - 21815	LC/MS neg	46992					1.2		0.1635	0.3457		2.8146	2.1803	1.203		83	89		N/A	N/A
				X - 21816	LC/MS neg	46993					2.56		0.15	0.329		0.7916	1.8431	2.5589		78	78		N/A	N/A
				X - 21821	LC/MS neg	46998					1.02		0.5371	0.5612		0.8922	0.8109	1.0158		78	83		N/A	N/A
				X - 21834	LC/MS neg	47011					1.42		0.9957	0.7032		1.2874	1.6056	1.4184		94	94		N/A	N/A
				X - 21838	LC/MS neg	47015					1.98		0.5189	0.5517		0.254	0.2324	1.9832		11	17		N/A	N/A
				X - 21842	LC/MS neg	47019					1.09		0.3036	0.4519		1.2138	0.8624	1.0934		72	56		N/A	N/A
				X - 21845	LC/MS neg	47022					1.41		0.8669	0.674		1.0707	1.0236	1.4077		72	67		N/A	N/A
				X - 21851	LC/MS neg	47028					1.08		0.4267	0.5107		0.9925	0.8741	1.0802		83	89		N/A	N/A
				X - 22143	LC/MS neg	47389					0.95		0.221	0.3916		1.2897	1.1451	0.9494		100	100		N/A	N/A
				X - 22162	LC/MS pos early	47417					0.98		0.3101	0.4544		1.1449	1.1017	0.9763		100	100		N/A	N/A
				X - 22508	LC/MS neg	47772					1.14		0.9976	0.7032		1.1613	1.2926	1.1429		94	83		N/A	N/A
				X - 22509	LC/MS neg	47773					2.96		0.0702	0.246		0.8439	1.8081	2.9569		50	67		N/A	N/A
				X - 22520	LC/MS neg	47784					0.97		0.1465	0.3243		1.1634	0.8766	0.9728		78	72		N/A	N/A
				X - 22771	LC/MS neg	48076					0.97		0.2471	0.4134		1.0532	1.0016	0.968		100	100		N/A	N/A
				X - 22776	LC/MS neg	48081					1.2		0.0159	0.1563		0.9617	1.1477	1.1965		100	100		N/A	N/A
				X - 23157	LC/MS neg	48771					2.12		0.3827	0.4873		1.62	1.3329	2.1186		56	67		N/A	N/A
				X - 23276	LC/MS neg	48972					2.29		2.0251e-06	0.0004		0.7399	1.5084	2.2867		100	100		N/A	N/A
				X - 23587	LC/MS pos early	49463					1.4		0.9985	0.7032		1.9814	2.7275	1.3976		100	94		N/A	N/A
				X - 23593	LC/MS pos early	49469					1.09		0.5892	0.584		1.0715	1.1075	1.0885		100	100		N/A	N/A
				X - 23636	LC/MS pos early	49512					1.17		0.0853	0.2651		0.9216	1.0562	1.1687		100	100		N/A	N/A
				X - 23639	LC/MS pos early	49515					1.08		0.7076	0.6265		1.1306	1.1014	1.0778		100	100		N/A	N/A
				X - 23641	LC/MS pos late	49517					1.99		0.0364	0.1982		0.875	1.2113	1.9918		78	94		N/A	N/A
				X - 23644	LC/MS pos early	49521					2.53		0.2644	0.4237		1.8695	3.7677	2.5274		100	100		N/A	N/A
				X - 23648	LC/MS pos early	49525					1.37		0.8154	0.657		1.4075	1.1898	1.3675		94	94		N/A	N/A
				X - 23654	LC/MS pos early	49531					1.01		0.6474	0.6031		1.0643	1.0353	1.0093		100	100		N/A	N/A
				X - 23655	LC/MS pos early	49532					6.11		0.0238	0.1753		0.8439	1.6155	6.1067		78	94		N/A	N/A
				X - 23659	LC/MS pos early	49536					1.11		0.9325	0.6894		0.9953	1.0226	1.1089		89	89		N/A	N/A
				X - 23665	LC/MS pos early	49542					1.07		0.3219	0.4574		1.2242	0.995	1.0709		100	100		N/A	N/A
				X - 23666	LC/MS pos early	49543					1.03		0.8745	0.6769		0.982	0.966	1.0307		100	94		N/A	N/A
				X - 23678	LC/MS pos late	49555					0.94		0.1861	0.3698		1.0021	0.8802	0.9409		89	89		N/A	N/A
				X - 23680	LC/MS pos late	49557					1.29		0.1212	0.3019		1.0662	1.2739	1.2927		100	100		N/A	N/A
				X - 23739	LC/MS pos early	49637					1.1		0.5854	0.5831		0.9784	1.0025	1.1009		100	100		N/A	N/A
				X - 23782	LC/MS pos late	49681					1.04		0.3557	0.4724		1.2055	1.0491	1.0385		100	100		N/A	N/A
				X - 23787	LC/MS neg	49688					1.04		0.6453	0.6031		0.9666	1.0032	1.0392		94	94		N/A	N/A
				X - 23974	LC/MS neg	49883					1.15		0.1322	0.3103		1.0414	1.1344	1.1465		100	100		N/A	N/A
				X - 23997	LC/MS pos early	52025					1.03		0.1926	0.3711		1.0743	0.8938	1.0321		100	100		N/A	N/A
				X - 24243	LC/MS pos early	52286					1.05		0.0687	0.2433		1.8829	1.3649	1.0496		100	83		N/A	N/A
				X - 24295	LC/MS neg	52483					0.95		0.1424	0.319		1.1623	1.0177	0.95		100	100		N/A	N/A
				X - 24307	LC/MS neg	52502					1.62		0.1411	0.3185		1.226	1.8595	1.6176		100	100		N/A	N/A
				X - 24328	LC/MS neg	52524					1		0.6381	0.6027		1.0546	1.0348	1.0008		100	100		N/A	N/A
				X - 24334	LC/MS neg	52530					0.7		0.0003	0.0261		1.3308	0.8999	0.7036		100	100		N/A	N/A
				X - 24337	LC/MS neg	52533					1.07		0.683	0.6175		1.1128	1.1708	1.0664		100	100		N/A	N/A
				X - 24344	LC/MS neg	52540					3.26		0.1921	0.371		1.5926	1.122	3.2554		78	89		N/A	N/A
				X - 24352	LC/MS neg	52548					1.47		0.7274	0.6336		2.3459	1.0334	1.4707		72	83		N/A	N/A
				X - 24418	LC/MS neg	52647					0.99		0.276	0.4317		1.0499	0.8588	0.9871		83	94		N/A	N/A
				X - 24425	LC/MS pos early	52655					1.14		0.7313	0.6348		0.9871	1.0355	1.1437		83	83		N/A	N/A
				X - 24489	LC/MS neg	52808					22.23		0.4104	0.5027		1.5548	7.4703	22.2318		6	33		N/A	N/A
				X - 24494	LC/MS neg	52813					1.44		0.7952	0.6473		1.1852	1.102	1.4376		94	100		N/A	N/A
				X - 24541	LC/MS neg	52862					4.2		0.0896	0.2718		0.6531	1.4687	4.2047		50	67		N/A	N/A
				X - 24544	LC/MS neg	52865					1.12		0.7937	0.6468		1.126	1.0723	1.1215		94	94		N/A	N/A
				X - 24545	LC/MS neg	52866					2		0.6543	0.6049		0.948	1.1221	2.0027		83	89		N/A	N/A
				X - 24546	LC/MS neg	52867					0.84		0.029	0.1861		1.0674	0.8888	0.8393		83	72		N/A	N/A
				X - 24549	LC/MS neg	52870					1.25		0.0538	0.2243		0.9339	1.1129	1.2524		100	100		N/A	N/A
				X - 24556	LC/MS neg	52877					1.2		0.5123	0.5488		0.978	1.0789	1.1985		100	100		N/A	N/A
				X - 24565	LC/MS neg	52886					4.03		0.9532	0.6943		3.1513	2.5394	4.033		89	78		N/A	N/A
				X - 24571	LC/MS neg	52892					22.02		0.4991	0.5398		5.0466	10.5445	22.0247		61	83		N/A	N/A
				X - 24576	LC/MS neg	52897					8.74		0.0115	0.1439		0.2662	2.1189	8.7369		17	56		N/A	N/A
				X - 24588	LC/MS neg	52909					1.11		0.7682	0.6452		1.0654	1.0773	1.1111		100	100		N/A	N/A
				X - 24669	LC/MS neg	53097					0.98		0.2093	0.3825		1.1029	0.9418	0.9838		94	83		N/A	N/A
				X - 24757	LC/MS neg	54695					3.05		0.3621	0.4755		1.1108	1.7783	3.0531		100	94		N/A	N/A
				X - 24762	LC/MS neg	54700					1.14		0.4687	0.5281		1.0265	1.1935	1.145		94	100		N/A	N/A
				X - 24811	LC/MS pos early	54839					3.04		0.0113	0.1439		0.754	1.4574	3.0417		89	100		N/A	N/A
				X - 24812	LC/MS pos early	54840					0.91		0.0925	0.2728		1.2703	1.0339	0.9111		100	100		N/A	N/A
				X - 24947	LC/MS neg	57714					0.96		0.1969	0.3754		1.2379	1.1083	0.9558		94	94		N/A	N/A
				X - 24949	LC/MS neg	57716					1.09		0.9309	0.6888		1.0478	1.0014	1.0943		100	100		N/A	N/A
				X - 24951	LC/MS neg	57718					0.81		0.0138	0.1501		1.3506	0.9323	0.814		100	100		N/A	N/A
				X - 24953	LC/MS neg	57720					1.03		0.587	0.5835		0.9986	0.9469	1.0251		100	100		N/A	N/A
				X - 24970	LC/MS pos early	57754					1.13		0.4468	0.5189		0.7616	0.803	1.1293		100	94		N/A	N/A
				X - 25172	LC/MS pos early	62151					1.43		0.3937	0.4953		1.202	1.5393	1.432		100	100		N/A	N/A
				X - 25265	LC/MS pos early	62494					1.33		0.8946	0.6831		0.8224	0.8383	1.3314		100	100		N/A	N/A
				X - 25271	LC/MS pos early	62500					4.37		0.8999	0.6848		3.1788	2.5526	4.3705		100	100		N/A	N/A
				X - 25279	LC/MS neg	62521					1.88		0.2264	0.3983		2.2493	1.3109	1.88		78	67		N/A	N/A
				X - 25343	LC/MS pos early	62636					1.11		0.7822	0.6468		1.0714	1.0698	1.1089		100	100		N/A	N/A
				X - 25371	LC/MS neg	62664					0.98		0.3781	0.4854		1.0648	1.0236	0.9779		100	100		N/A	N/A
				X - 25419	LC/MS pos early	62716					1.12		0.4294	0.5119		2.5146	2.721	1.1214		100	94		N/A	N/A
				X - 25420	LC/MS pos early	62717					1.08		0.4859	0.5336		1.2736	1.1362	1.0772		100	100		N/A	N/A
				X - 25422	LC/MS pos early	62719					1.16		0.9255	0.6875		1.3464	1.482	1.1599		100	100		N/A	N/A
				X - 25433	LC/MS neg	62749					1.04		0.5202	0.5517		1.359	1.2682	1.0414		100	100		N/A	N/A
				X - 25503	LC/MS neg	62937					1.36		0.1178	0.2976		0.5237	0.6892	1.3633		22	22		N/A	N/A
				X - 25519	LC/MS pos early	62963					1.3		0.0468	0.2118		0.9858	1.1693	1.2985		100	100		N/A	N/A
				X - 25520	LC/MS pos early	62964					0.95		0.124	0.3026		1.2068	0.9268	0.9535		100	94		N/A	N/A
				X - 25523	LC/MS neg	62967					9.84		0.2389	0.4061		0.1919	1.3288	9.8399		11	22		N/A	N/A
				X - 25656	LC/MS pos early	63332					15.24		0.0476	0.2134		0.635	8.0946	15.2379		50	72		N/A	N/A
				X - 25800	LC/MS neg	63572					3.68		0.8282	0.6616		1.2939	1.1865	3.6793		33	39		N/A	N/A
				X - 25802	LC/MS neg	63574					2.03		0.824	0.66		0.8787	2.8888	2.0305		78	56		N/A	N/A
				X - 25805	LC/MS neg	63577					4.88		0.8381	0.6644		1.1086	0.9918	4.8787		28	28		N/A	N/A
				X - 25810	LC/MS pos early	63592					0.84		0.0181	0.1648		2.0926	1.4794	0.8407		100	100		N/A	N/A
				X - 25828	LC/MS pos early	63634					1.04		0.9905	0.7011		1.0654	1.0565	1.0417		100	100		N/A	N/A
				X - 25957	LC/MS pos early	63908					1.31		0.2969	0.4459		0.9135	1.0737	1.3137		100	100		N/A	N/A
				X - 26054	LC/MS neg	64267					0.91		0.0337	0.1948		1.1738	1.0369	0.9133		100	100		N/A	N/A
				X - 26062	LC/MS neg	64337					4.63		0.0028	0.1067		5.3627	8.4488	4.6305		78	83		N/A	N/A
				X - 26106	LC/MS pos late	64395					1.03		0.4915	0.5353		1.1628	1.0879	1.0303		94	100		N/A	N/A
				X - 26107	LC/MS pos late	64396					0.98		0.3725	0.4796		1.0593	1.0073	0.9754		100	100		N/A	N/A
				X - 26108	LC/MS pos late	64397					1.05		0.7839	0.6468		1.0043	1.0012	1.0522		100	100		N/A	N/A
				X - 26109	LC/MS neg	64399					0.99		0.3884	0.4906		1.4835	1.5099	0.9881		100	100		N/A	N/A
				X - 26111	LC/MS neg	64401					1.39		0.9229	0.6861		1.1462	1.0689	1.3948		100	100		N/A	N/A
				X - 26119	LC/MS neg	64440					0.85		0.0146	0.1523		1.143	0.9248	0.8495		100	100		N/A	N/A
